# Supplementary material
Source: publisher figshare collection journal article supplement (https://sage.figshare.com/ndownloader/files/20045750)
Supplement: Supplementary file 1 [file 20045750]

speaker	age	group	lang	type	token	duration	F1	F2	F3
AMM	36	fr	fr	UH	0	0	0	0	0
AMM	36	fr	fr	UH	0	0	0	0	0
AMM	36	fr	fr	UH	0	0	0	0	0
AMM	36	fr	fr	UH	0	0	0	0	0
AMM	36	fr	fr	UH	0	0	0	0	0
AMM	36	fr	fr	UH	0	0	0	0	0
AMM	36	fr	fr	UH	0	0	0	0	0
AMM	36	fr	fr	UH	0	0	0	0	0
AMM	36	fr	fr	UH	0	0	0	0	0
AMM	36	fr	fr	UH	0	0	0	0	0
AMM	36	fr	fr	UH	0	0	0	0	0
AMM	36	fr	fr	UH	0	0	0	0	0
AMM	36	fr	fr	UH	0	0	0	0	0
AMM	36	fr	fr	UH	0	0	0	0	0
AMM	36	fr	fr	UH	0	0	0	0	0
AMM	36	fr	fr	UH	0	0	0	0	0
AMM	36	fr	fr	UH	0	0	0	0	0
AMM	36	fr	fr	UH	0	0	0	0	0
AMM	36	fr	fr	UH	0	0	0	0	0
AMM	36	fr	fr	UH	0	0	0	0	0
AMM	36	fr	fr	UH	0	0	0	0	0
AMM	36	fr	fr	UH	0	0	0	0	0
AMM	36	fr	fr	UH	0	0	0	0	0
AMM	36	fr	fr	UH	0	0	0	0	0
AMM	36	fr	fr	UH	0	0	0	0	0
AMM	36	fr	fr	UH	0	0	0	0	0
AMM	36	fr	fr	UH	0	0	0	0	0
AMM	36	fr	fr	UH	0	0	0	0	0
AMM	36	fr	fr	UH	0	0	0	0	0
AMM	36	fr	fr	UH	0	0	0	0	0
AMM	36	fr	fr	UH	0	0	0	0	0
AMM	36	fr	fr	UH	0	0	0	0	0
AMM	36	fr	fr	UH	1	0.4184580498866214	690.67053340839675	1927.7320438622046	2861.776864838511
AMM	36	fr	fr	UH	2	0.9260544217687076	630.7951438849843	1728.4072764000312	2785.798172869709
AMM	36	fr	fr	UH	3	0.4380272108843538	535.2220649688417	1874.2793942997628	2784.346999417083
AMM	36	fr	fr	UH	4	0.3237414965986395	631.3492376636067	1866.667853560725	2723.446010839834
AMM	36	fr	fr	UH	5	0.4046938775510204	476.1079315996392	1220.2184464399895	2555.3104240409643
AMM	36	fr	fr	UH	6	0.2748072562358277	474.5877501298774	1867.5550605085946	2710.527766318062
AMM	36	fr	fr	UH	7	0.4156689342403629	512.1807955288056	1813.8490253185873	2716.0151358141406
AMM	36	fr	fr	UH	8	0.21448979591836734	613.6477025653267	1951.6968821730625	2718.7785030230048
AMM	36	fr	fr	UH	9	0.2391609977324263	567.1482236986044	1740.8716942094775	2583.4193336665217
AMM	36	fr	fr	UH	10	0.2935827664399093	621.968605426838	1859.9833884549616	2543.301568599644
AMM	36	fr	fr	UH	11	0.1897052154195011	661.7273121064625	1782.1951504595604	2752.371301198769
AMM	36	fr	fr	UH	12	0.25269841269841264	526.6800959489686	1912.721009723837	2849.961159198763
AMM	36	fr	fr	UH	13	0.4118367346938776	749.3715044785707	1928.3332650690963	2784.4485974661998
AMM	36	fr	fr	UH	14	0.25056689342403626	694.9228999039289	2005.9916371049635	2758.8646588837173
AMM	36	fr	fr	UH	15	0.7743083900226757	678.4626361290437	1862.3061117900045	2714.068051993879
AMM	36	fr	fr	UH	16	0.30988662131519273	565.8868073269005	1454.2777057612398	2690.694929118318
AMM	36	fr	fr	UH	17	0.3570975056689343	443.8855603494256	1492.3794911447983	2639.682371301985
AMM	36	fr	fr	UH	18	0.08405895691609977	526.9783961642349	1772.9359029698487	2721.339510984602
AMM	36	fr	fr	UH	19	1.6668253968253968	546.9125615930966	1903.6594063217158	2772.1299891152116
AMM	36	fr	fr	UH	20	0.428639455782313	569.2839632792394	1790.9427710743798	2711.2112121096393
AMM	36	fr	fr	UH	21	0.16229024943310658	448.5505699302835	1379.9979419382603	2598.1492226776127
AMM	36	fr	fr	UH	22	0.29732426303854875	582.9478753823537	1713.610557120575	2679.9846584083252
AMM	36	fr	fr	UH	23	0.0764172335600907	478.84419637917955	1487.52725003681	2802.481500571076
AMM	36	fr	fr	UH	24	0.5025170068027212	676.9885260070289	1591.9720665922914	2656.644726894742
AMM	36	fr	fr	UH	25	0.8355782312925171	605.8937185759348	1606.4077415951213	2659.1943736173835
AMM	36	fr	fr	UH	26	0.33122448979591834	459.86927814003116	1614.5973485413663	2683.407219423957
AMM	36	fr	fr	UH	27	0.18444444444444444	573.460244848112	1863.2301914993172	2617.618130827379
AMM	36	fr	fr	UH	28	0.5877097505668935	604.985019145628	1732.1640453820773	2845.0994053310596
AMM	36	fr	fr	UH	29	1.4496598639455782	517.7168192841194	1562.7889892495036	2694.0843572511576
AMM	36	fr	fr	UH	30	0.808639455782313	548.3181835844787	1735.859112616347	2760.759789770711
AMM	36	fr	fr	UH	31	0.3030612244897959	642.3022208208276	1429.5160376043082	2672.430303487763
AMM	36	fr	fr	UH	32	1.2404308390022676	679.3295471736651	1767.7814467444414	2755.3270039654526
AMM	36	fr	fr	UH	33	0.32564625850340134	479.86358321829925	1641.854909458933	2667.9369298093507
AMM	36	fr	fr	UH	34	0.31637188208616784	713.9986426541427	1709.4101633966382	2724.288493140756
AMM	36	fr	fr	UH	35	0.12773242630385487	544.1562458068688	1647.9472661742727	2689.194793583142
AMM	36	fr	fr	UH	36	0.24532879818594103	593.9457880876565	1589.007656020273	2990.445227867181
AMM	36	fr	fr	UH	37	0.182562358276644	639.4600743438083	1256.1402657274489	2706.2736822844186
AMM	36	fr	fr	UH	38	0.8813151927437642	527.2530683994298	1694.9297328776493	2671.2649618923433
AMM	36	fr	fr	UH	39	0.19054421768707483	535.9632345079413	1699.3165166785006	2754.9888284189124
AMM	36	fr	fr	UH	40	0.18585034013605442	670.5295221594641	1472.5951539320974	2737.653145855515
AMM	36	fr	fr	UH	41	0.42303854875283453	583.4131999194433	1645.8957119444945	2604.3923589303286
AMM	36	fr	fr	UH	42	0.4670748299319728	546.38159014236	1661.1461238236811	2981.1956998586575
AMM	36	fr	fr	UH	43	0.9800680272108845	584.4647075730552	1678.567364089125	2824.409419157805
AMM	36	fr	fr	UH	44	0.20879818594104307	613.7860433845632	1437.4676206481454	2674.8604550607897
AMM	36	fr	fr	UH	45	0	0	0	0
AMM	36	fr	fr	UH	46	0.6164852607709751	662.8662196861411	1708.897645856789	2525.1405191108747
AMM	36	fr	fr	UH	47	0.5633786848072563	498.7718362604807	1594.9812167224995	2564.959993482028
AMM	36	fr	fr	UH	48	0.2618367346938776	475.24482518583756	1629.9868323883768	2761.4523233052296
AMM	36	fr	fr	UH	49	0.25888888888888884	714.0985347414493	1635.6117598217522	2587.8050271729157
AMM	36	fr	fr	UH	50	0.5138775510204082	592.5995310010919	1644.3704797831074	2926.137647833122
AMM	36	fr	fr	UH	51	0.3943764172335601	780.4509539493357	1839.491031129909	2906.4403423888193
AMM	36	fr	fr	UH	52	0.7159410430839003	613.6845529473459	1716.4628786045557	2700.836741481071
AMM	36	fr	fr	UH	53	0.4219047619047619	706.450919652889	1801.9762226687355	2616.8744540898724
AMM	36	fr	fr	UH	54	0.49360544217687075	627.2413474151931	1819.3644001080813	2643.5767713276327
AMM	36	fr	fr	UH	55	0.7257596371882087	652.5686637643693	1806.348902613508	2750.494635555752
AMM	36	fr	fr	UH	56	0.3370068027210884	749.3421919367594	1816.45681904863	2766.7260168447933
AMM	36	fr	fr	UH	57	0.09115646258503401	586.2069939239085	1875.6621986104349	2761.1114706301573
AMM	36	fr	fr	UH	58	0.8429251700680273	539.2972258829417	1716.2082990036827	2644.0426151070797
AMM	36	fr	fr	UH	59	0.5518367346938776	533.8012162369416	1710.2244038797517	2737.579827725087
AMM	36	fr	fr	UH	60	0.39507936507936503	665.8454718672075	1610.2367346035041	2777.579914430533
AMM	36	fr	fr	UH	61	0.26585034013605446	627.6620572655586	1774.5678072466426	2718.5347089204834
AMM	36	fr	fr	UH	62	0.8291836734693878	631.4724164653004	1541.6123026328935	2798.467122397103
AMM	36	fr	fr	UH	63	0.46267573696145126	645.7737261965499	1542.5921798260033	2756.8147821676394
AMM	36	fr	fr	UH	64	0.5331972789115647	529.5843176396913	1598.4972384789107	2719.340463891965
AMM	36	fr	fr	UH	65	0.474421768707483	576.5048234530675	1789.975434786142	2503.1615490042477
AMM	36	fr	fr	UH	66	0.41145124716553294	663.4825951611992	1736.1683963069463	2747.1516191894075
AMM	36	fr	fr	UH	67	0.7760090702947846	578.2890525330498	1382.982757822615	2693.3024818230147
AMM	36	fr	fr	UH	68	0.35990929705215424	597.4661441983304	1605.1757795992207	2574.729188061681
AMM	36	fr	fr	UH	69	0.8002267573696146	463.8700748565342	1787.5776414794495	2819.978023403316
AMM	36	fr	fr	UH	70	0	0	0	0
AMM	36	fr	fr	UH	71	0.2421995464852608	691.5242073730149	1692.1140411184574	2778.0632212458613
AMM	36	fr	fr	UH	72	0.567687074829932	577.3174684403486	1695.174878906772	2616.0568823042686
AMM	36	fr	fr	UH	73	0.47941043083900226	471.3808710843406	1841.456441675723	2618.6170851441125
AMM	36	fr	fr	UH	74	0.2621995464852608	367.8123864174075	1721.1170766994633	2885.2675664633225
AMM	36	fr	fr	UH	75	0.2700226757369615	578.4165161940713	1733.8435728925963	2747.380824254507
AMM	36	fr	fr	UH	76	0.19560090702947844	489.8674382399634	1945.5622104422503	2585.967088876254
AMM	36	fr	fr	UH	77	0.1347392290249433	489.33497994768044	1712.6081623603707	2607.4256276977235
AMM	36	fr	fr	UH	78	0.18401360544217685	548.236265434502	1458.765456650802	2570.395799997157
AMM	36	fr	fr	UH	79	0.2495238095238095	543.7792083297313	1593.7801212195438	2558.42729515115
AMM	36	fr	fr	UH	80	0.09165532879818594	683.4278341571386	1703.710358815496	2701.2584123482093
AMM	36	fr	fr	UH	81	0.1400907029478458	532.7501586389528	1437.679124150856	2584.3238922112887
AMM	36	fr	fr	UH	82	0.2727891156462585	592.5311060427177	1580.3192304219326	2642.3441568369512
AMM	36	fr	fr	UH	83	0.23136054421768706	581.3054480048438	1843.7331509378391	2685.938066521954
AMM	36	fr	fr	UH	84	0.7544897959183674	758.2832032441916	1553.699402554873	2718.356201519421
AMM	36	fr	fr	UH	85	0.14435374149659863	690.833774351091	1575.5381551485857	2875.7133092452004
AMM	36	fr	fr	UH	86	0.20750566893424036	639.1105943631536	1611.9898777539506	2666.4133311840674
AMM	36	fr	fr	UH	87	0.35045351473922903	563.2974535172701	1679.0386589296534	2613.595989683064
AMM	36	fr	fr	UH	88	0.7738321995464853	516.7318165087233	1631.3791271013502	2572.7165967281912
AMM	36	fr	fr	UH	89	0.5111111111111112	575.6094150485071	1729.4583485705655	2635.5874159901055
AMM	36	fr	fr	UH	90	0.37222222222222223	552.9913307307709	1598.4120736780076	2594.362020063815
AMM	36	fr	fr	UH	91	0.15870748299319729	506.4024843832663	1645.6861988111941	2671.9531723489035
AMM	36	fr	fr	UH	92	0.23303854875283445	669.1839340842056	1766.7876747687396	2736.499784235053
AMM	36	fr	fr	UH	93	0.8086167800453515	594.8260364001759	1540.2337350454986	2722.982305923166
AMM	36	fr	fr	UH	94	0.5272108843537415	529.9655677958514	1688.5753190599085	2614.3419357201574
AMM	36	fr	fr	UH	95	0.1322675736961451	544.7098639715313	1594.9806531351555	2687.5437431800324
AMM	36	fr	fr	UH	96	0.6570748299319729	569.7092584389915	1800.942617549795	2652.853834320704
AMM	36	fr	fr	UH	97	0.29532879818594104	511.6379944889053	1694.0739329272378	2606.447068361939
AMM	36	fr	fr	UH	98	0.3602947845804989	502.35644338256463	1658.1322531394271	2516.5895096510394
AMM	36	fr	fr	UH	99	0.44673469387755105	651.2353424742608	1847.0161733692257	2715.6351485702216
AMM	36	fr	fr	UM	0	0	0	0	0
AMM	36	fr	fr	UM	0	0	0	0	0
AMM	36	fr	fr	UM	1	0	0	0	0
AMM	36	fr	fr	UM	2	0.24775510204081633	608.5505473619339	1878.0551454194863	2815.632703762357
AMM	36	fr	fr	UM	3	0.279297052154195	698.5059001874838	1899.9772734622113	2736.7955623515613
AMM	36	fr	fr	UM	4	0.252562358276644	620.1591182567586	1961.456785614602	2779.449003778943
AMM	36	fr	fr	UM	5	0.0754421768707483	569.6303838683677	1763.570034583981	2727.7173045595173
AMM	36	fr	fr	UM	6	0.17442176870748297	608.2566873891619	1904.348974505348	2830.301428602613
AMM	36	fr	fr	UM	7	0.20596371882086165	573.5555017365597	1754.3122745743453	2707.84406987328
AMM	36	fr	fr	UM	8	0.27870748299319725	737.884257597002	1807.485260873683	2681.5055128545487
AMM	36	fr	fr	UM	9	0.5631519274376418	683.0740122046634	1697.646750282584	2746.0313317424093
AMM	36	fr	fr	UM	10	0.3268934240362812	613.6165174056215	1863.9774856244428	2611.251070370175
AMM	36	fr	fr	UM	11	0.6280725623582767	702.8211274610187	1808.9893844386875	2752.7489908652547
AMM	36	fr	fr	UM	12	0.875827664399093	573.41935047354	1654.760195083072	2731.4735600207055
AMM	36	fr	fr	UM	13	0.22390022675736962	597.7666691219308	1822.1344698994008	2840.554771238504
AMM	36	fr	fr	UM	14	0.1689795918367347	585.6551604624651	1881.8560298336606	2737.0937463154914
AMM	36	fr	fr	UM	15	0.3136054421768707	687.1270247381137	1627.401680877646	2935.6628848178675
AMM	36	fr	fr	UM	16	0.2507709750566893	700.8144775315425	2027.1688381274605	2753.2934761597144
AMM	36	fr	fr	UM	17	0.2739002267573696	707.0531703069129	1620.3496446288477	3060.3779018048654
AMM	36	fr	fr	UM	18	0.19600907029478457	660.3851155221005	1865.0803616568496	2653.488626967201
AMS	24	fr	fr	UH	0	0	0	0	0
AMS	24	fr	fr	UH	0	0	0	0	0
AMS	24	fr	fr	UH	0	0	0	0	0
AMS	24	fr	fr	UH	0	0	0	0	0
AMS	24	fr	fr	UH	0	0	0	0	0
AMS	24	fr	fr	UH	0	0	0	0	0
AMS	24	fr	fr	UH	0	0	0	0	0
AMS	24	fr	fr	UH	0	0	0	0	0
AMS	24	fr	fr	UH	0	0	0	0	0
AMS	24	fr	fr	UH	0	0	0	0	0
AMS	24	fr	fr	UH	0	0	0	0	0
AMS	24	fr	fr	UH	0	0	0	0	0
AMS	24	fr	fr	UH	0	0	0	0	0
AMS	24	fr	fr	UH	0	0	0	0	0
AMS	24	fr	fr	UH	0	0	0	0	0
AMS	24	fr	fr	UH	0	0	0	0	0
AMS	24	fr	fr	UH	0	0	0	0	0
AMS	24	fr	fr	UH	0	0	0	0	0
AMS	24	fr	fr	UH	0	0	0	0	0
AMS	24	fr	fr	UH	0	0	0	0	0
AMS	24	fr	fr	UH	0	0	0	0	0
AMS	24	fr	fr	UH	0	0	0	0	0
AMS	24	fr	fr	UH	0	0	0	0	0
AMS	24	fr	fr	UH	0	0	0	0	0
AMS	24	fr	fr	UH	0	0	0	0	0
AMS	24	fr	fr	UH	0	0	0	0	0
AMS	24	fr	fr	UH	0	0	0	0	0
AMS	24	fr	fr	UH	0	0	0	0	0
AMS	24	fr	fr	UH	0	0	0	0	0
AMS	24	fr	fr	UH	0	0	0	0	0
AMS	24	fr	fr	UH	0	0	0	0	0
AMS	24	fr	fr	UH	1	0	0	0	0
AMS	24	fr	fr	UH	2	0.16843537414965984	364.6072187761149	1713.1254092403835	2774.425729834565
AMS	24	fr	fr	UH	3	0.6225850340136054	402.7569435383774	1727.4229233964631	2779.888983610097
AMS	24	fr	fr	UH	4	0	0	0	0
AMS	24	fr	fr	UH	5	0.2494331065759637	541.7109526280749	1383.2284082712138	2761.2270211990067
AMS	24	fr	fr	UH	6	0.14682539682539683	609.2436256284059	1659.7748984730886	2852.851701035596
AMS	24	fr	fr	UH	7	0.6641269841269841	449.33949202456654	1781.4246079495372	2488.640240232292
AMS	24	fr	fr	UH	8	0.26392290249433104	610.3724193900296	1695.3541193321894	2912.9314704110966
AMS	24	fr	fr	UH	9	0.4701133786848073	487.7892540020597	1678.1327856622047	2489.8994941636765
AMS	24	fr	fr	UH	10	0.17639455782312927	563.2197684238347	1701.8102695408302	2503.977600520926
AMS	24	fr	fr	UH	100	0.20167800453514736	459.8303892950339	1767.13533351691	2449.8279973859426
AMS	24	fr	fr	UH	101	0.22362811791383222	517.1582174807293	1881.2118625958574	2804.349923331739
AMS	24	fr	fr	UH	102	0.21253968253968256	515.0473587945661	1765.6633918090367	2631.3154939144965
AMS	24	fr	fr	UH	103	0.34582766439909296	431.1746944540679	1745.1982178802464	2747.4770579990586
AMS	24	fr	fr	UH	104	0.89859410430839	618.3612672445574	1628.561746604821	2927.511327601216
AMS	24	fr	fr	UH	105	0.19061224489795917	526.1306477324306	1836.8490568542452	2879.5668169020937
AMS	24	fr	fr	UH	106	0.4074149659863946	528.2617333560611	1875.6786939620044	2891.184710888004
AMS	24	fr	fr	UH	107	0.358843537414966	568.2540937875427	1752.9342026986317	2984.4239903786984
AMS	24	fr	fr	UH	108	1.0199773242630386	513.620671033347	1693.8689953676687	2834.792845829414
AMS	24	fr	fr	UH	109	0.41739229024943314	547.3800151978363	1646.0600260310912	2534.974161514737
AMS	24	fr	fr	UH	11	0.14612244897959184	377.7075017995559	1283.2643358696782	2566.4255003931085
AMS	24	fr	fr	UH	110	0.5636281179138323	513.246946586152	1711.335876891414	2877.6176483637905
AMS	24	fr	fr	UH	111	0.2291609977324263	757.3114144224679	1798.9172068631692	3045.203667625087
AMS	24	fr	fr	UH	112	0.44789115646258504	634.1578499870378	1651.743947008314	2878.0101311974336
AMS	24	fr	fr	UH	113	0.2952834467120181	509.3515853035995	1829.1601928838893	2987.5818668229736
AMS	24	fr	fr	UH	114	0.6347165532879819	531.148285419187	1588.9125986710885	2538.206714504432
AMS	24	fr	fr	UH	115	0.977437641723356	502.7764485644706	1606.5910721215891	2691.537828014653
AMS	24	fr	fr	UH	116	0.11013605442176871	380.3289961603182	1691.9304132425743	2699.6580187479594
AMS	24	fr	fr	UH	117	0.07800453514739228	546.3272472458787	1780.1140935042297	2459.002102807457
AMS	24	fr	fr	UH	1171	0.23807256235827665	613.0727232161755	1681.06435899738	2668.3786823836886
AMS	24	fr	fr	UH	118	0.5168027210884354	592.4794524915784	1606.6624473875368	2746.2561572633545
AMS	24	fr	fr	UH	119	0.1902267573696145	645.9252932149834	1620.8791460277516	2713.87538918579
AMS	24	fr	fr	UH	12	0.13136054421768706	428.40488171136565	1603.9352649093505	2695.1435839761334
AMS	24	fr	fr	UH	120	0.252562358276644	554.064326018742	1802.2199405244269	2699.7927087028042
AMS	24	fr	fr	UH	121	0.4519274376417234	518.0580503465792	1587.366608025367	2758.9679691936362
AMS	24	fr	fr	UH	122	0.38317460317460317	460.5231487459116	1539.707966131618	2712.513252738433
AMS	24	fr	fr	UH	123	0.24882086167800452	671.662317502373	1856.5126556903583	2761.14557090023
AMS	24	fr	fr	UH	124	0.37802721088435376	467.0129563081824	1644.9537202187228	2721.266547698656
AMS	24	fr	fr	UH	125	0.7500453514739229	583.760929653706	1524.2483797950633	2502.4321652285366
AMS	24	fr	fr	UH	126	0.23519274376417235	426.1353307740652	1582.2860005488735	2572.5775080295375
AMS	24	fr	fr	UH	127	0.43018140589569165	567.702649602891	1597.5699893995256	2655.9996618117466
AMS	24	fr	fr	UH	128	0.3439682539682539	507.26767540069557	1651.416622537783	2627.878544700451
AMS	24	fr	fr	UH	129	0.2731746031746032	639.8550999806621	1555.3857237235718	2561.018717678101
AMS	24	fr	fr	UH	13	0.09038548752834466	533.2634442469445	1294.3580869896032	2661.356298522325
AMS	24	fr	fr	UH	130	0.43514739229024946	572.2989877063828	1697.3730359609435	2570.8051496339663
AMS	24	fr	fr	UH	131	0.28609977324263036	654.5007299981555	1603.821758115711	2966.1467092701896
AMS	24	fr	fr	UH	132	0.3100907029478458	623.2385135730905	1586.5436037594093	2753.1869560242376
AMS	24	fr	fr	UH	133	0.2457142857142857	688.058055565953	1745.4461206623016	2847.124083844782
AMS	24	fr	fr	UH	134	0.6705895691609978	572.1149685382	1798.9143345680725	2716.5769237675804
AMS	24	fr	fr	UH	135	0.8685034013605443	594.2120950411005	1678.2759482317163	2700.460128290768
AMS	24	fr	fr	UH	136	0.7211791383219955	554.6720767914435	1495.611347235173	2798.112048239474
AMS	24	fr	fr	UH	137	0.48809523809523814	595.5214443642493	1726.0866237959526	2754.067787775528
AMS	24	fr	fr	UH	138	0.32680272108843533	513.6883998456561	1767.9552310706208	2501.2926131411677
AMS	24	fr	fr	UH	139	0.1464172335600907	546.4209507098208	1785.8550891180614	2538.612845435975
AMS	24	fr	fr	UH	14	0.30963718820861674	604.6557360218998	1769.6041882981522	2795.799302824119
AMS	24	fr	fr	UH	140	1.0848526077097504	621.2183824471069	1740.9488063462925	2821.413659918018
AMS	24	fr	fr	UH	142	0.3066439909297052	587.7268494009563	1751.4645392987031	2780.97352909176
AMS	24	fr	fr	UH	143	0.29142857142857137	684.4094015801577	1766.4617644602356	2825.234796385099
AMS	24	fr	fr	UH	144	0.5006802721088436	702.4585180960833	1815.2721278459865	2819.2049652562823
AMS	24	fr	fr	UH	145	0.4388208616780046	601.0694851946241	1941.756670133784	2873.6173270278305
AMS	24	fr	fr	UH	146	0.21786848072562356	593.9675322751233	1793.001759084166	2705.216754823839
AMS	24	fr	fr	UH	147	0.5185260770975056	571.758069558958	1728.2158960426364	2811.848088349782
AMS	24	fr	fr	UH	148	0.45140589569161005	682.1570093495634	1613.5378592093339	2683.9028835357553
AMS	24	fr	fr	UH	149	0	0	0	0
AMS	24	fr	fr	UH	15	0.9029478458049888	574.8351239465219	1475.4674595203703	2655.578761048611
AMS	24	fr	fr	UH	150	0.22344671201814056	478.92253434006545	1800.505947113902	2564.0356517127075
AMS	24	fr	fr	UH	151	0.21997732426303854	420.8656533101689	1575.9988098773415	2935.660837083231
AMS	24	fr	fr	UH	152	0.2006802721088435	505.77569937203725	1655.5449339598845	2649.607027354643
AMS	24	fr	fr	UH	153	0.2456235827664399	516.6804694102343	1674.902917644139	2697.195863190464
AMS	24	fr	fr	UH	154	0.3466666666666667	534.8240973443632	1603.1425074128097	2476.3959351031226
AMS	24	fr	fr	UH	155	0.30217687074829935	516.0226028004427	1835.9499047344893	2959.6915363826492
AMS	24	fr	fr	UH	156	0.24081632653061222	637.8124676191233	1622.8009045902008	2998.926636624683
AMS	24	fr	fr	UH	157	0.13653061224489796	474.64951958871177	2000.4353331572727	2571.905172870975
AMS	24	fr	fr	UH	158	0	0	0	0
AMS	24	fr	fr	UH	159	0.22503401360544215	578.0910627609824	1808.754834671969	2833.782470669092
AMS	24	fr	fr	UH	16	0.22428571428571428	544.9800565862395	1431.2825215827306	2568.3794216192164
AMS	24	fr	fr	UH	160	0.15825396825396823	507.46031666991416	1371.8439205834818	2499.6748055786657
AMS	24	fr	fr	UH	161	0.20356009070294787	631.094042324845	1507.9225387968308	2958.353922348064
AMS	24	fr	fr	UH	162	0.23496598639455782	472.579803636871	1575.5187457542836	2512.4302238608184
AMS	24	fr	fr	UH	163	0.37197278911564624	440.2141747901538	1691.467920206845	2579.1583299040212
AMS	24	fr	fr	UH	164	0.5287981859410431	565.5195716277253	1578.946450343125	2615.1473218223073
AMS	24	fr	fr	UH	1641	0.14233560090702949	503.22231588230744	1551.4304484940942	2659.0189237143427
AMS	24	fr	fr	UH	165	0.9503174603174603	484.56306370109684	1669.508557014445	2728.685800666346
AMS	24	fr	fr	UH	166	1.072063492063492	568.8523920363797	1808.2288188265031	2775.377452946341
AMS	24	fr	fr	UH	167	0.2570975056689342	460.83359712921873	1826.3826277651046	2599.9639772892792
AMS	24	fr	fr	UH	168	0.4007936507936508	591.0217950600259	1769.0382778225642	2812.3663407122804
AMS	24	fr	fr	UH	169	0.42818594104308394	676.7550319213144	1618.430171542998	2910.9614398631184
AMS	24	fr	fr	UH	17	0.2687301587301587	339.7193884127029	1575.938322648092	2712.0839367272997
AMS	24	fr	fr	UH	170	0.15453514739229027	554.9293251739878	1668.6982825096238	3050.464488256001
AMS	24	fr	fr	UH	171	0.654421768707483	609.5733569005348	1697.9130942021452	2559.5723954380587
AMS	24	fr	fr	UH	172	0.3425850340136054	536.8761124842446	1622.0035647513723	3161.693042762207
AMS	24	fr	fr	UH	173	0.6186167800453515	635.5414551240347	1651.3905314170072	2639.100488702122
AMS	24	fr	fr	UH	174	0	0	0	0
AMS	24	fr	fr	UH	175	0.15811791383219956	631.1423130363588	1876.3777177737306	2875.1158481939565
AMS	24	fr	fr	UH	176	0.21616780045351472	439.5736102031482	1631.371061600148	2541.034403178398
AMS	24	fr	fr	UH	177	0.2219954648526077	607.4173161242004	1706.380148741901	2611.0588026447267
AMS	24	fr	fr	UH	178	0.40265306122448985	621.3209259626265	1670.8379763714913	2666.1690879117896
AMS	24	fr	fr	UH	179	0.3434920634920635	429.98785431973295	1481.532298400534	2496.930480240968
AMS	24	fr	fr	UH	18	0.6782993197278911	595.6964084791207	1906.7517508738424	2578.3131380279106
AMS	24	fr	fr	UH	180	0.14956916099773243	654.9819414748424	1685.8062117979814	2761.6358434907324
AMS	24	fr	fr	UH	181	0.2468253968253968	620.5588181309336	1608.1019021300517	2861.3828725632525
AMS	24	fr	fr	UH	19	0.3772789115646259	475.07518985027843	1736.02888329303	2518.8557165803804
AMS	24	fr	fr	UH	20	0	0	0	0
AMS	24	fr	fr	UH	21	0	0	0	0
AMS	24	fr	fr	UH	22	0.1363718820861678	484.8570495137951	1565.0881144221337	2618.2469273421593
AMS	24	fr	fr	UH	23	0.20873015873015874	571.2723166403296	1507.8813823516316	2705.8736094856495
AMS	24	fr	fr	UH	24	1.2959410430839002	386.9575480111214	1719.9049303260063	2495.9869149055385
AMS	24	fr	fr	UH	25	0.14793650793650792	485.0117577813577	1690.5807462965206	2606.0610299599775
AMS	24	fr	fr	UH	26	0.48038548752834465	451.9590215213542	1563.5589853683528	2441.870309950077
AMS	24	fr	fr	UH	27	0.3256009070294784	581.9348842271077	1687.1811620633732	2750.542693446318
AMS	24	fr	fr	UH	28	0.27136054421768707	546.6187564243239	1597.0119366714573	2670.4757595602764
AMS	24	fr	fr	UH	29	0.2606802721088435	585.9263970997422	1658.9473140791333	2740.591679811463
AMS	24	fr	fr	UH	30	0.6813605442176871	414.6834810424224	1627.6220867592313	2596.3268690673713
AMS	24	fr	fr	UH	31	0.221156462585034	397.03227863694195	1661.1509340065954	2697.116092014309
AMS	24	fr	fr	UH	32	0.18102040816326528	678.4905685488228	1688.6241351662204	2706.101026979352
AMS	24	fr	fr	UH	33	0.7833560090702948	428.1897538444084	1546.7106803701445	2511.493584768377
AMS	24	fr	fr	UH	34	0.24852607709750565	440.4732895806427	1731.7265575345457	2510.6599565762417
AMS	24	fr	fr	UH	35	0	0	0	0
AMS	24	fr	fr	UH	36	0.7642403628117914	439.4947248994051	1656.9379593272129	2654.441470926907
AMS	24	fr	fr	UH	37	0.21900226757369615	555.0358667146635	1692.4226405559757	2860.833408421848
AMS	24	fr	fr	UH	38	0.2572108843537415	633.6696389115864	1641.775574834287	2798.250322381925
AMS	24	fr	fr	UH	39	0.23970521541950116	591.7323254374418	1899.165430285137	2819.1351909714804
AMS	24	fr	fr	UH	40	0.2578231292517007	522.3685751548978	1720.5392851269853	2778.9402522514874
AMS	24	fr	fr	UH	41	0.7087528344671202	518.567283289548	1708.9869425986933	2650.8289688852956
AMS	24	fr	fr	UH	42	0.557936507936508	514.5894322494036	1710.3196600923247	2383.154507309632
AMS	24	fr	fr	UH	43	0.8353061224489796	573.5287828686033	1569.880844158616	2744.7615253390286
AMS	24	fr	fr	UH	44	0.2853514739229025	618.6954354092786	1674.9233231897276	2703.2770865559673
AMS	24	fr	fr	UH	45	0.4465759637188209	604.2225391572651	1809.461411491886	2563.2088517724264
AMS	24	fr	fr	UH	46	0.8917687074829932	591.4327483059878	1538.749417055397	2615.0795067631498
AMS	24	fr	fr	UH	47	0.6535827664399093	492.0352881827123	1573.153132981589	2605.0713563643653
AMS	24	fr	fr	UH	48	0.2353061224489796	469.4873993679393	1794.605134953837	2661.581982635141
AMS	24	fr	fr	UH	49	0.657687074829932	512.0361525674839	1989.8428551146135	2779.3088929737764
AMS	24	fr	fr	UH	50	0.44789115646258504	544.9124689553857	1568.7485631048312	2497.4136176956126
AMS	24	fr	fr	UH	51	0.10736961451247165	457.24036173845127	1546.1625934152853	2295.289990054641
AMS	24	fr	fr	UH	52	0.736031746031746	649.7275876835307	1761.4023035102748	2959.6786099519504
AMS	24	fr	fr	UH	53	0.18095238095238095	439.1001197087463	1775.3185786918336	2511.8527123194835
AMS	24	fr	fr	UH	54	0.17387755102040817	535.0084873279663	1704.4421071763713	2751.144106619561
AMS	24	fr	fr	UH	55	0.3993424036281179	669.5414618737149	1767.8146514786865	2634.2474248431554
AMS	24	fr	fr	UH	56	0.15183673469387757	523.3556739734715	1982.0709468580105	2871.168288221166
AMS	24	fr	fr	UH	57	0.3182086167800453	812.8041837481205	1628.2413888811327	2985.9485188988756
AMS	24	fr	fr	UH	58	0.32405895691609976	709.2556429613496	1780.3352049422094	2863.1731073455376
AMS	24	fr	fr	UH	59	0.6495918367346939	621.777512966144	1806.1850530104018	2840.0606537978324
AMS	24	fr	fr	UH	60	0.22537414965986394	644.7008078128608	1865.3092578960366	2711.58329270367
AMS	24	fr	fr	UH	61	0.2696371882086168	451.3081637326127	1610.5418637092603	2404.712838592827
AMS	24	fr	fr	UH	62	0.11244897959183672	607.6585601435735	1725.357646630458	2619.2448781680996
AMS	24	fr	fr	UH	63	0.25451247165532875	568.8676117029763	1579.043549739495	2701.451115540488
AMS	24	fr	fr	UH	64	0.29145124716553283	516.898538408554	1773.7215642477418	2575.2209860383396
AMS	24	fr	fr	UH	65	0.27845804988662126	407.7949043801729	1724.1742355224778	2565.521728750237
AMS	24	fr	fr	UH	66	0.2897732426303855	453.49480448480415	1637.734552859966	2888.8662988876686
AMS	24	fr	fr	UH	67	0.22346938775510203	558.6193940048787	1510.72578715884	2563.3281441313325
AMS	24	fr	fr	UH	68	0.1738548752834467	569.6014641838194	1716.4125217944156	2763.5916887811786
AMS	24	fr	fr	UH	69	0.21639455782312925	482.6064166696713	1856.1795334495155	2433.9933762995097
AMS	24	fr	fr	UH	70	0.32721088435374146	312.3925678772183	1601.5728517064967	2857.8387315895598
AMS	24	fr	fr	UH	71	0.4143990929705216	533.5900620050929	1557.6964080702612	2622.0547943763804
AMS	24	fr	fr	UH	72	0.2453514739229025	567.3984590206022	1422.8325591783796	2663.232388777844
AMS	24	fr	fr	UH	73	0.30011337868480725	499.00281297700303	1548.2246331529705	2575.567795570081
AMS	24	fr	fr	UH	74	0.33789115646258505	619.9646904168776	1821.6126448551292	3102.612624245761
AMS	24	fr	fr	UH	75	0.20603174603174604	459.02978245662644	1624.832098476174	2670.3617566503854
AMS	24	fr	fr	UH	76	0.38070294784580494	523.0020816164911	1667.5912779650675	2530.922498847717
AMS	24	fr	fr	UH	77	0.4311791383219955	379.74909069708633	1888.603164972119	2454.8096092340393
AMS	24	fr	fr	UH	78	0.3017913832199547	668.2747335630922	1779.0293025840956	2688.573643538213
AMS	24	fr	fr	UH	79	0.20977324263038546	629.8549752451258	1835.9927580868655	2893.166557936572
AMS	24	fr	fr	UH	80	0.19172335600907028	406.61082196812487	1728.682430283317	2618.191486603005
AMS	24	fr	fr	UH	81	0.28870748299319726	593.0351661427459	1839.9452041008253	2839.224924828282
AMS	24	fr	fr	UH	82	0.40920634920634924	556.8363885108333	1912.8611190748484	2680.5829882019825
AMS	24	fr	fr	UH	83	0.28718820861678007	630.2816119313079	1945.0577858700317	2946.0085828099764
AMS	24	fr	fr	UH	84	0.6691156462585034	476.5958079271359	1775.958149883205	2927.677315007554
AMS	24	fr	fr	UH	85	0.3400907029478458	433.3646861000203	1500.4741263026576	2643.6107251156145
AMS	24	fr	fr	UH	86	0.48052154195011343	611.0072250013939	1769.0880624868832	2571.919135957609
AMS	24	fr	fr	UH	87	0.1952607709750567	466.7687138113284	1902.7664733695203	2873.0635414902717
AMS	24	fr	fr	UH	88	0.2554421768707483	556.5050198565787	1751.4145596732078	2713.343465796916
AMS	24	fr	fr	UH	89	0.4095238095238095	635.1763922055802	1752.0293183979925	2605.0809950306493
AMS	24	fr	fr	UH	90	0.22160997732426305	624.5245641432169	1704.9710497404044	2770.871896352204
AMS	24	fr	fr	UH	91	0.8405442176870749	635.5503969889471	1800.300744721589	2873.730163735589
AMS	24	fr	fr	UH	92	0.33687074829931973	468.45536424400404	2089.215478982705	2792.298977909589
AMS	24	fr	fr	UH	93	0.15065759637188206	519.0942458030595	1718.4887172099873	2558.019029403715
AMS	24	fr	fr	UH	94	0.2943990929705216	514.6837149333774	1760.3255991683402	2825.9275351936612
AMS	24	fr	fr	UH	95	0.4148752834467121	457.59916420840597	1725.76839855654	2603.713682535019
AMS	24	fr	fr	UH	96	0.7339455782312926	449.5033711087569	1479.3404590838186	2422.891454518767
AMS	24	fr	fr	UH	97	0.3892743764172335	658.0458966381893	1623.9314209901577	2811.55121072603
AMS	24	fr	fr	UH	98	0	0	0	0
AMS	24	fr	fr	UH	99	0.7492970521541951	495.85721146432326	1651.5015517960155	2462.5471947245305
AMS	24	fr	fr	UM	0	0	0	0	0
AMS	24	fr	fr	UM	0	0	0	0	0
AMS	24	fr	fr	UM	0	0	0	0	0
AMS	24	fr	fr	UM	0	0	0	0	0
AMS	24	fr	fr	UM	1	0.479342403628118	612.551258934368	1843.0293992632642	2756.4924150660877
AMS	24	fr	fr	UM	2	0.2477777777777778	427.77806987161466	1601.1866510876384	2584.181326057984
AMS	24	fr	fr	UM	3	0.4587074829931973	641.2179732771959	1591.6233890695469	2502.0539575010357
AMS	24	fr	fr	UM	4	0.1136281179138322	553.1635172011446	1851.366469642652	2618.2249637402733
AMS	24	fr	fr	UM	5	0.4200226757369615	688.4916055839026	1685.1514290917962	2878.7759631611625
AMS	24	fr	fr	UM	6	0.2442857142857143	634.0287057703716	1774.2200433089336	2805.2896564622833
AMS	24	fr	fr	UM	7	0.33970521541950116	567.5728262261542	1779.280645786315	2820.362149927722
AMS	24	fr	fr	UM	8	0.17718820861678006	403.2698384549174	1593.4916117554571	2541.033481297992
AMS	24	fr	fr	UM	9	0.3505895691609977	788.023033698337	1721.6363914530325	2735.44148964602
AMS	24	fr	fr	UM	10	0.19095238095238096	734.5042425103395	1664.2585787915764	3032.4844905064265
AMS	24	fr	fr	UM	11	0.20820861678004535	813.9720698482447	1650.15880555161	2862.8495734721673
AMS	24	fr	fr	UM	12	0.2568027210884354	649.602805009996	1852.545913585948	2873.3954670669045
AMS	24	fr	fr	UM	13	0.29575963718820864	547.7182930753504	1554.6496919741485	2565.9451432907235
AMS	24	fr	fr	UM	14	1.4424489795918367	525.4671868678757	1544.8159873185884	2501.2814414318377
AMS	24	fr	fr	UM	15	0.29986394557823126	599.2191352862939	1605.0350127303197	2785.609725895308
AMS	24	fr	fr	UM	16	0.40519274376417236	595.1295681356276	1765.1198661262972	2725.991283535235
AMS	24	fr	fr	UM	17	0.11873015873015871	526.2460623271636	1618.8531646010379	2859.440245480276
AMS	24	fr	fr	UM	18	0.1899546485260771	559.1523279667995	1468.243102389495	2382.472880777434
AMS	24	fr	fr	UM	19	0.2848072562358277	586.8849436248076	1743.6288259982007	2838.0259334702023
AMS	24	fr	fr	UM	20	0.41993197278911565	638.0279167380161	1692.956718781658	2792.151265500743
AMS	24	fr	fr	UM	21	0.4440816326530612	580.0961493389862	1750.5128331808119	2649.9126288058787
AMS	24	fr	fr	UM	22	0.27131519274376414	517.566542862771	1623.9822204883808	2673.9960249768683
AMS	24	fr	fr	UM	23	0.5565079365079365	574.1472486277545	1686.6562404331994	2736.9824450172555
ARI	33	fr	fr	UH	0	0	0	0	0
ARI	33	fr	fr	UH	0	0	0	0	0
ARI	33	fr	fr	UH	0	0	0	0	0
ARI	33	fr	fr	UH	0	0	0	0	0
ARI	33	fr	fr	UH	0	0	0	0	0
ARI	33	fr	fr	UH	0	0	0	0	0
ARI	33	fr	fr	UH	0	0	0	0	0
ARI	33	fr	fr	UH	0	0	0	0	0
ARI	33	fr	fr	UH	0	0	0	0	0
ARI	33	fr	fr	UH	0	0	0	0	0
ARI	33	fr	fr	UH	0	0	0	0	0
ARI	33	fr	fr	UH	0	0	0	0	0
ARI	33	fr	fr	UH	0	0	0	0	0
ARI	33	fr	fr	UH	0	0	0	0	0
ARI	33	fr	fr	UH	0	0	0	0	0
ARI	33	fr	fr	UH	0	0	0	0	0
ARI	33	fr	fr	UH	0	0	0	0	0
ARI	33	fr	fr	UH	0	0	0	0	0
ARI	33	fr	fr	UH	0	0	0	0	0
ARI	33	fr	fr	UH	1	0.28192743764172334	659.9685396142004	1827.299285775261	2828.5479376990816
ARI	33	fr	fr	UH	2	0.13591836734693877	432.77286652532587	1291.304403356146	2695.0505203228704
ARI	33	fr	fr	UH	3	0.16337868480725623	537.2476850016601	1690.2324925740786	2740.31616468059
ARI	33	fr	fr	UH	4	0.6024263038548753	592.7952089698315	1530.2760904230809	2785.3911854657
ARI	33	fr	fr	UH	5	0.6784807256235827	612.2665963068931	1501.0058130231153	2723.9597810821338
ARI	33	fr	fr	UH	6	0.24857142857142858	383.2535049289891	1329.15907014279	2531.7947087133725
ARI	33	fr	fr	UH	7	0.21814058956916102	489.80945671014905	1380.9366249567213	2568.888041402259
ARI	33	fr	fr	UH	8	0.2576870748299319	535.2343280702187	1241.1547795248975	2710.718861614396
ARI	33	fr	fr	UH	9	0.12170068027210884	589.137683214236	1684.123948971986	2673.8959648243426
ARI	33	fr	fr	UH	10	0.3921995464852608	480.3200167757186	1318.6466617869082	2670.901786133069
ARI	33	fr	fr	UH	11	0.22984126984126982	427.4381256912352	1490.3291730122157	2800.4626167623137
ARI	33	fr	fr	UH	12	0.19072562358276643	542.7502297558325	1148.0466021024592	2782.221967991048
ARI	33	fr	fr	UH	13	0.4487528344671202	426.5721088664988	1136.1247181188926	2566.7461252171706
ARI	33	fr	fr	UH	14	0.3179591836734694	523.3342221728548	1162.4392703887415	2667.8686580824447
ARI	33	fr	fr	UH	15	0.15578231292517006	526.4115906668696	1468.9679002185928	2641.190880680332
ARI	33	fr	fr	UH	16	0.6059183673469388	594.6823619684525	1703.9395605319194	2774.2466056216517
ARI	33	fr	fr	UH	17	0.5790249433106576	438.715633631629	1491.2371016109148	2739.0878353925314
ARI	33	fr	fr	UH	18	0.46582766439909296	411.7535516548842	1503.0401096955661	2677.3401202986774
ARI	33	fr	fr	UH	19	0.2219954648526077	591.072097517651	1231.3016226666869	2622.092984110141
ARI	33	fr	fr	UH	20	0.24117913832199547	617.6620139968736	1435.2052032665947	2771.0259404421085
ARI	33	fr	fr	UH	21	0.38045351473922906	591.6417873357989	1495.8976339660853	2799.985115734383
ARI	33	fr	fr	UH	22	0.7420181405895692	561.2097264452368	1724.5546177938222	2838.8527181661275
ARI	33	fr	fr	UH	23	0.2993424036281179	528.2806872129129	1156.7369738116186	2668.154360502929
ARI	33	fr	fr	UH	24	0.5280272108843538	529.5403245078227	1064.5614009514018	2660.9914871299193
ARI	33	fr	fr	UH	25	0.31963718820861675	494.6857189258596	1530.4834113310014	2623.7180422942524
ARI	33	fr	fr	UH	26	0.5059637188208617	579.7841841202031	1459.6636592386287	2700.930324307915
ARI	33	fr	fr	UH	27	0.7570975056689343	737.6301067154858	1464.949991822963	2585.317009128213
ARI	33	fr	fr	UH	28	0.4705442176870749	570.5261929111672	1449.4703794713466	2655.7024255962915
ARI	33	fr	fr	UH	29	0.19653061224489796	473.2031092830074	1403.3544573545012	2723.3324394039846
ARI	33	fr	fr	UH	30	0.3490022675736961	531.5214716410534	1321.5678136318254	2730.484343775984
ARI	33	fr	fr	UH	31	0.4958049886621315	510.5578712977708	1410.942273526194	2593.4416843387403
ARI	33	fr	fr	UH	32	0.42557823129251704	667.0637841990005	1589.4761005777998	2737.1095221695955
ARI	33	fr	fr	UH	33	0	0	0	0
ARI	33	fr	fr	UH	34	0.2184580498866213	561.6747117602971	1443.086883494755	2684.7185834360603
ARI	33	fr	fr	UH	35	0.46655328798185947	660.0068934598411	1584.6125870289532	2700.088676107899
ARI	33	fr	fr	UH	36	0.8473242630385488	562.1033545133815	1649.2251714558693	2622.2443793793786
ARI	33	fr	fr	UH	37	0.5857142857142857	662.2225218277845	1384.2481930069266	2592.860472318068
ARI	33	fr	fr	UH	38	0.1932879818594104	385.4528368168503	1410.457572039658	2582.264124732567
ARI	33	fr	fr	UH	39	0.32126984126984126	431.4319198101738	1222.5589881352432	2622.9232418877864
ARI	33	fr	fr	UH	40	0.3747165532879818	504.86920183734566	1533.4324444911192	2852.6200532362996
ARI	33	fr	fr	UH	41	0.08628117913832198	505.48110242906205	1468.3207948915813	2815.305604359937
ARI	33	fr	fr	UH	42	0.2419501133786848	489.4362295773854	1431.4310846474607	2702.080323692452
ARI	33	fr	fr	UH	43	0.1850793650793651	510.46710208428726	1622.4498009499314	2672.9860292811886
ARI	33	fr	fr	UH	44	0.6432199546485261	601.2191528846313	1580.1172962139703	2865.924279232084
ARI	33	fr	fr	UH	45	0.20009070294784578	546.5006103457908	1440.8994407930602	2575.0330105532466
ARI	33	fr	fr	UH	46	0.55	491.41309993542654	1343.4659150775126	2722.8343441364577
ARI	33	fr	fr	UH	47	0.20097505668934237	520.7139070741932	1323.4180792009292	2701.6482329937826
ARI	33	fr	fr	UH	48	0.2985714285714286	564.1446985106453	1407.7358298099768	2758.2807817717694
ARI	33	fr	fr	UH	49	0.16693877551020406	327.2170222273884	1468.6204133035703	2751.0005874234766
ARI	33	fr	fr	UH	50	0.30072562358276644	458.9130371136043	1251.346375509562	2649.890459998622
ARI	33	fr	fr	UH	51	0.08487528344671202	560.3698984385843	1596.4968702584001	2850.0164734839977
ARI	33	fr	fr	UH	52	0.31934240362811794	459.33139220276405	1607.4465151439429	2712.7360039829628
ARI	33	fr	fr	UH	53	0.116734693877551	668.1157351321741	1469.2523505598942	2786.5449341986587
ARI	33	fr	fr	UH	54	0.21065759637188206	499.4157694554199	1738.7552933383793	2588.230909000905
ARI	33	fr	fr	UH	55	0.9146031746031745	647.9227140144984	1399.9790625379246	2726.1654331086897
ARI	33	fr	fr	UH	56	0.3769160997732426	525.4492456332694	1475.0306470176113	2895.16037926122
ARI	33	fr	fr	UH	57	0	0	0	0
ARI	33	fr	fr	UH	58	0.313469387755102	558.9980015796291	1426.0721297579125	2586.669101585834
ARI	33	fr	fr	UH	59	0.2210657596371882	430.441821639517	1353.9605905429885	2612.0224894213043
ARI	33	fr	fr	UH	60	0.11360544217687074	364.7899250391322	1424.5206123975402	2751.3021186966175
ARI	33	fr	fr	UH	61	0.3779365079365079	533.7672676731532	1146.8608650125889	2707.845048164599
ARI	33	fr	fr	UH	62	0.22662131519274378	427.23345647264364	1677.5477847024545	2765.233648851483
ARI	33	fr	fr	UH	63	0.16902494331065757	408.51180606206964	1693.5169317462205	2836.8139039200573
ARI	33	fr	fr	UH	64	0.24532879818594103	533.7356052097568	1221.8104674006427	2781.551542978595
ARI	33	fr	fr	UH	65	0.5404761904761904	492.391049673698	1104.2011238161144	2634.447554463377
ARI	33	fr	fr	UH	66	1.046984126984127	591.3280507759713	1572.6980560014172	2747.38480461993
ARI	33	fr	fr	UM	0	0	0	0	0
ARI	33	fr	fr	UM	0	0	0	0	0
ARI	33	fr	fr	UM	1	0.3280952380952381	631.3874592223104	1548.1252966048014	2694.074884987248
ARI	33	fr	fr	UM	2	0.38056689342403627	643.289839964446	1412.5455667571196	2660.1802265626297
ARI	33	fr	fr	UM	3	0.5199319727891156	545.181266538396	1552.837858285756	2593.5896269792333
ARI	33	fr	fr	UM	4	0.2765532879818594	518.3474712520004	1476.154869638241	2817.8642205683554
ARI	33	fr	fr	UM	5	0.1714285714285714	482.5185054925112	1413.548701044049	2637.145697257741
ARI	33	fr	fr	UM	6	0.3459863945578231	671.6280685872418	1586.2426020218754	2697.0688766963617
ARI	33	fr	fr	UM	7	0.543265306122449	496.36684049117844	1553.5826862435704	2699.0825398657253
ARI	33	fr	fr	UM	8	0.31587301587301586	604.5595763220384	1575.474757285728	2670.3256229838707
CAR	20	dt	fr	UH	0	0	0	0	0
CAR	20	dt	fr	UH	0	0	0	0	0
CAR	20	dt	fr	UH	0	0	0	0	0
CAR	20	dt	fr	UH	0	0	0	0	0
CAR	20	dt	fr	UH	0	0	0	0	0
CAR	20	dt	fr	UH	0	0	0	0	0
CAR	20	dt	fr	UH	1	0.3709750566893424	747.6226768983626	1604.8648215240094	2711.16377939296
CAR	20	dt	fr	UH	2	0.3049206349206349	674.9507920971739	1534.8386595965917	2879.9348387889913
CAR	20	dt	fr	UH	3	0.2873015873015873	496.311091420943	1730.0507419834057	2927.4580099076566
CAR	20	dt	fr	UH	4	0.1443764172335601	683.335808257353	1518.5729356715678	2819.849728441034
CAR	20	dt	fr	UH	5	0.28634920634920635	631.6289245349122	1627.5271842970812	2962.856050795794
CAR	20	dt	fr	UH	6	0.19687074829931975	725.2290937687015	1914.7829963520596	2967.498678195079
CAR	20	dt	fr	UH	7	0.23990929705215416	635.5259430502991	1525.5516937690854	2954.0419919990745
CAR	20	dt	fr	UH	8	0.13956916099773242	627.007253907523	1462.9560290841907	2720.938490344672
CAR	20	dt	fr	UH	9	0.23578231292517007	722.7187714513035	1717.4410733010488	2909.9808797638066
CAR	20	dt	fr	UH	10	0.20183673469387756	627.5559460880442	1471.2640879450773	2962.9336314120355
CAR	20	dt	fr	UH	11	0.4613832199546486	683.4272667261139	1190.7104409210046	3034.954030525593
CAR	20	dt	fr	UH	12	0.2380045351473923	647.1507046937218	1837.5440750560385	2751.2910044285354
CAR	20	dt	fr	UH	13	0.33904761904761904	624.7105296953858	1667.1840670335382	2964.054644332355
CAR	20	dt	fr	UH	14	0.28548752834467117	636.8843506207487	1678.5819597116529	2935.584402569042
CAR	20	dt	fr	UH	141	0	0	0	0
CAR	20	dt	fr	UH	15	0.2056235827664399	675.6221604134308	1754.5018549839367	2839.936810958072
CAR	20	dt	fr	UH	16	0.618843537414966	708.7624269407194	1635.9016527241179	2976.7784139299183
CAR	20	dt	fr	UH	17	0.5838775510204082	679.2873967435221	1601.624638146648	2999.3704422551245
CAR	20	dt	fr	UH	18	0.2196598639455782	723.8519090892287	1636.322383414612	2782.6182219600446
CAR	20	dt	fr	UH	19	0.1	632.6739433173002	1862.2082243779678	3008.835294468928
CAR	20	dt	fr	UH	20	0.6165986394557823	727.923364386302	1552.4611808576542	2889.4371078499216
CAR	20	dt	fr	UH	21	0.23380952380952383	692.4731948618904	1165.5218609585888	2927.8403207484166
CAR	20	dt	fr	UH	22	0.1965079365079365	755.3237900774512	1607.0644372074405	2668.3052315436694
CAR	20	dt	fr	UH	23	0.177437641723356	716.8859009947819	1428.6642956473868	2846.6735085192586
CAR	20	dt	fr	UH	24	0.32897959183673464	678.7152060156315	1562.7468142194848	2877.5585627602413
CAR	20	dt	fr	UH	25	0.42859410430839007	560.8986681124313	1709.019026980742	2705.0312908293195
CAR	20	dt	fr	UH	26	0.2545578231292517	640.067820863937	1662.7634240844986	3075.5056223064216
CAR	20	dt	fr	UH	27	0.25748299319727885	661.9770007084575	1728.404516850615	2949.0530751887763
CAR	20	dt	fr	UH	28	0.754172335600907	577.9057314708123	1497.773247004891	2900.545457945083
CAR	20	dt	fr	UM	0	0	0	0	0
CAR	20	dt	fr	UM	1	0.4813378684807257	724.2389830684292	1333.3716441860095	2732.5017621747384
CAR	20	dt	fr	UM	2	0.20351473922902494	706.9539230077871	1704.7648010217592	2968.6890876122548
CAR	20	dt	fr	UM	3	0.2898412698412698	709.477555677557	1572.4151579879665	2940.385202561151
CAR	20	dt	fr	UM	4	0.16777777777777778	672.3029404900955	1537.6550113746941	2884.5620702368406
CAR	20	dt	fr	UM	5	0.6068027210884354	674.0497822680443	1578.6475769318217	2839.6831614955017
CAR	20	dt	fr	UM	6	0.14795918367346939	687.5852706029187	1769.486849082387	3117.090542802851
CAR	20	dt	fr	UM	7	0.170702947845805	615.4489719127591	1829.3349374598056	3081.765836241974
CAR	20	dt	fr	UM	8	0.4972789115646259	720.1566996699711	1729.4625641083912	2777.7532567260414
CAR	20	dt	fr	UM	9	0.25530612244897954	658.8190696828157	1758.7201561726479	2838.0755082222213
CAR	20	dt	fr	UM	10	0.2752834467120181	643.9277001731813	1849.203733970391	2927.54169634375
CHP	40	fr	fr	UH	0	0	0	0	0
CHP	40	fr	fr	UH	0	0	0	0	0
CHP	40	fr	fr	UH	0	0	0	0	0
CHP	40	fr	fr	UH	0	0	0	0	0
CHP	40	fr	fr	UH	0	0	0	0	0
CHP	40	fr	fr	UH	0	0	0	0	0
CHP	40	fr	fr	UH	0	0	0	0	0
CHP	40	fr	fr	UH	1	0.1320861678004535	493.2947339948058	1658.041431948633	2677.875065478477
CHP	40	fr	fr	UH	2	0.22746031746031745	483.0318543180283	1669.569526020798	2685.254533686289
CHP	40	fr	fr	UH	3	0.3259637188208617	431.58883775282766	1607.7569072055544	2787.697708615292
CHP	40	fr	fr	UH	4	0.19560090702947844	376.89962134346797	1519.6528564322357	2968.8338217055407
CHP	40	fr	fr	UH	5	0.11893424036281178	523.13834697438	1547.9345384369617	2946.5501207921716
CHP	40	fr	fr	UH	6	0.4439002267573696	592.8812412678011	1668.7742615086738	2873.093220077604
CHP	40	fr	fr	UH	7	0.21875283446712016	649.4512308145497	1961.6357318080543	3015.3410826888526
CHP	40	fr	fr	UH	8	0.4842403628117914	604.0244933503311	1660.7150625769937	3099.0255045723666
CHP	40	fr	fr	UH	9	0.20843537414965987	523.2834071007596	1590.910851979193	2866.1333959642907
CHP	40	fr	fr	UH	10	0.18696145124716554	402.67423535693547	1700.088351898196	2797.867128299831
CHP	40	fr	fr	UH	11	0.13095238095238096	446.2423113056412	1753.1611423703546	2927.33373991418
CHP	40	fr	fr	UH	12	0.32401360544217683	435.4208437181826	1856.7334842185153	2774.8886464129596
CHP	40	fr	fr	UH	13	0.181156462585034	528.1258485199761	1517.5263404206712	2875.0480649347023
CHP	40	fr	fr	UH	14	0.21346938775510202	426.0556395143372	1508.4560377673872	2714.870858568101
CHP	40	fr	fr	UH	15	0.15918367346938775	363.939609184632	1542.7842728906087	2882.0309102784895
CHP	40	fr	fr	UH	16	0.09954648526077098	513.2566995111066	1647.8778142368499	2923.768063498623
CHP	40	fr	fr	UH	17	0.23625850340136054	620.8868507611917	1592.1859865676747	2948.93401822261
CHP	40	fr	fr	UH	18	0.26487528344671196	645.0146299953927	1693.0086557077689	2666.622859179657
CHP	40	fr	fr	UH	19	0.3240362811791383	497.61816793716264	1321.9286808314087	2549.754275873619
CHP	40	fr	fr	UH	20	0.33929705215419503	654.1690515527537	1826.606459167933	3069.644895043798
CHP	40	fr	fr	UH	21	0.16886621315192743	546.6869645550557	1567.4234809556137	2777.5211247359653
CHP	40	fr	fr	UH	22	0.14242630385487529	376.4967345938796	1680.9188822148203	2933.0804923288815
CHP	40	fr	fr	UH	23	0.23671201814058954	310.8759127544592	1152.7602520806618	2735.8859287076807
CHP	40	fr	fr	UH	24	0.24242630385487526	609.6021818084054	1668.832724398523	2725.8954531264867
CHP	40	fr	fr	UH	25	0.15419501133786848	417.1762936833394	1559.245392304187	2634.4638852128323
CHP	40	fr	fr	UH	26	0.5132426303854876	308.84135906911905	1516.0641032094422	2858.3927485347313
CHP	40	fr	fr	UH	27	0.24993197278911564	657.0947781424768	1715.0654155987945	2872.7178737313034
CHP	40	fr	fr	UH	28	0.22138321995464852	546.1795008386165	1407.1343583659489	2695.468432314529
CHP	40	fr	fr	UH	29	0.19351473922902493	632.1998821168369	1488.4153150138332	2965.559230228127
CHP	40	fr	fr	UH	30	0.25487528344671206	645.8339033462966	1644.8761892385592	2807.906161797504
CHP	40	fr	fr	UH	31	0	0	0	0
CHP	40	fr	fr	UH	32	0	0	0	0
CHP	40	fr	fr	UH	33	0.15789115646258503	542.87729675369485	1670.8327755721562	2758.738877873015
CHP	40	fr	fr	UH	34	0	0	0	0
CHP	40	fr	fr	UH	35	0.07444444444444445	468.727291085207	1756.937431947503	3064.2475974953354
CHP	40	fr	fr	UH	36	0.1900453514739229	300.9297964559557	1695.6549606452297	2669.816383900319
CHP	40	fr	fr	UH	37	0.3893877551020408	422.3766507397289	1563.6470045202482	2669.6539883521855
CHP	40	fr	fr	UH	38	0.13138321995464852	595.74515317516	1669.5848602619612	2444.6447818064207
CHP	40	fr	fr	UH	39	0.18321995464852606	484.5866811927868	1790.1520433922608	2908.199504058206
CHP	40	fr	fr	UH	40	0.24854875283446712	708.5825845954598	1694.8224353421203	2534.218909202726
CHP	40	fr	fr	UH	41	0.28083900226757375	420.622135241136	1624.2243945485302	2784.6857848880527
CHP	40	fr	fr	UM	0	0	0	0	0
CHP	40	fr	fr	UM	0	0	0	0	0
CHP	40	fr	fr	UM	0	0	0	0	0
CHP	40	fr	fr	UM	0	0	0	0	0
CHP	40	fr	fr	UM	1	0.1136734693877551	707.0976358045024	1492.786627044667	2965.551274118106
CHP	40	fr	fr	UM	2	0.1894331065759637	518.3142762979138	1545.7960541629986	2801.4756412111938
CHP	40	fr	fr	UM	3	0.18294784580498866	587.8795742969169	1626.9655708416544	2965.7214962490566
CHP	40	fr	fr	UM	4	0.15170068027210884	650.6009482672683	1798.7329593753611	2914.9775331200412
CHP	40	fr	fr	UM	5	0.09934240362811791	313.71780261287955	1688.2915661519094	2905.0789576128495
CHP	40	fr	fr	UM	6	0.15945578231292515	638.7968250669279	1723.8288255012258	2817.7319558990976
CHP	40	fr	fr	UM	7	0.09961451247165531	618.5226928271647	1591.196538121026	3084.7726894432203
CHP	40	fr	fr	UM	8	0.18027210884353742	452.99653166849737	1366.4384138398468	2648.7975703334323
CHP	40	fr	fr	UM	9	0.33873015873015877	635.32364213876	1681.4987110996194	2901.256013811251
CHP	40	fr	fr	UM	10	0.1483219954648526	633.8506402878918	1725.8866152509945	2980.1388220281597
CHP	40	fr	fr	UM	11	0.08972789115646257	575.8582090661439	1547.9843756579273	2844.7961616033654
CHP	40	fr	fr	UM	12	0	0	0	0
CHP	40	fr	fr	UM	13	0.28845804988662127	729.6163330620793	1748.5009197775687	2913.1298520490473
CHP	40	fr	fr	UM	14	0.24746031746031746	545.670375960258	1556.0783579659364	2705.202113722896
CHP	40	fr	fr	UM	15	0.19489795918367345	537.9529195532779	1827.1587142328328	2904.645959199844
CHP	40	fr	fr	UM	16	0.10725623582766439	493.05082630810455	1635.8377819252405	2968.280944612373
CHP	40	fr	fr	UM	17	0.11297052154195011	619.6119013049737	1723.048939471363	2748.378392061677
CHP	40	fr	fr	UM	18	0.20975056689342406	316.358242343124	1587.5316812248252	2911.57605287172
CHP	40	fr	fr	UM	19	0.1331065759637188	334.7686234300898	1742.7236225653041	2665.548964706269
CHP	40	fr	fr	UM	20	0.12907029478458049	512.6508972592902	1711.7711249990293	2751.751920206918
CHP	40	fr	fr	UM	21	0.3275963718820861	591.6170073727636	1701.332694336503	2941.525481361886
CHP	40	fr	fr	UM	22	0.5543537414965987	446.3503314245438	1687.2136734980263	2790.544073588997
CHP	40	fr	fr	UM	23	0.35517006802721085	366.9584139075808	1567.5772643603939	2799.706833273775
CHP	40	fr	fr	UM	24	0.28775510204081634	667.4000214107608	1506.5931108386117	2664.6906898168922
CHP	40	fr	fr	UM	25	0.11290249433106575	378.0874407161416	1491.072714237374	2347.6326879752455
CHP	40	fr	fr	UM	26	0.0953968253968254	699.5875891775927	1573.50945704828	3188.745265463322
CHP	40	fr	fr	UM	27	0.3142630385487528	484.71671959093544	1708.1338276350423	2684.03516968231
CHP	40	fr	fr	UM	28	0.12424036281179138	521.487202228066	1535.0017671384305	2599.2544988522836
CLF	34	fr	fr	UH	0	0	0	0	0
CLF	34	fr	fr	UH	0	0	0	0	0
CLF	34	fr	fr	UH	0	0	0	0	0
CLF	34	fr	fr	UH	0	0	0	0	0
CLF	34	fr	fr	UH	0	0	0	0	0
CLF	34	fr	fr	UH	0	0	0	0	0
CLF	34	fr	fr	UH	0	0	0	0	0
CLF	34	fr	fr	UH	0	0	0	0	0
CLF	34	fr	fr	UH	0	0	0	0	0
CLF	34	fr	fr	UH	0	0	0	0	0
CLF	34	fr	fr	UH	0	0	0	0	0
CLF	34	fr	fr	UH	0	0	0	0	0
CLF	34	fr	fr	UH	0	0	0	0	0
CLF	34	fr	fr	UH	0	0	0	0	0
CLF	34	fr	fr	UH	0	0	0	0	0
CLF	34	fr	fr	UH	0	0	0	0	0
CLF	34	fr	fr	UH	0	0	0	0	0
CLF	34	fr	fr	UH	0	0	0	0	0
CLF	34	fr	fr	UH	0	0	0	0	0
CLF	34	fr	fr	UH	0	0	0	0	0
CLF	34	fr	fr	UH	0	0	0	0	0
CLF	34	fr	fr	UH	0	0	0	0	0
CLF	34	fr	fr	UH	0	0	0	0	0
CLF	34	fr	fr	UH	0	0	0	0	0
CLF	34	fr	fr	UH	0	0	0	0	0
CLF	34	fr	fr	UH	0	0	0	0	0
CLF	34	fr	fr	UH	1	0.1492517006802721	642.459319153206	1513.0889012530001	2608.4810889261544
CLF	34	fr	fr	UH	2	0.23328798185941044	449.1180744955106	1643.0210996009976	2598.1757845140964
CLF	34	fr	fr	UH	3	0.12712018140589568	489.28484333600966	1745.80623520088	2394.6219247568515
CLF	34	fr	fr	UH	4	0.7411337868480726	579.1616688296439	1648.794115887124	2664.171091105538
CLF	34	fr	fr	UH	5	0.2139002267573696	596.7721927492638	1621.3742406900549	2558.0525698495485
CLF	34	fr	fr	UH	6	0.1227437641723356	670.8283006912027	1986.6300053343887	2921.959022319581
CLF	34	fr	fr	UH	7	0.2963265306122449	512.016220736096	1658.0693910892483	2608.0272846554262
CLF	34	fr	fr	UH	8	0.25276643990929704	572.5140247848094	1467.1085200684379	2549.181204046314
CLF	34	fr	fr	UH	9	0.4580952380952381	464.0070528529424	1627.1400834799877	2631.7307705447874
CLF	34	fr	fr	UH	10	0.1775283446712018	599.3618236196495	1816.9636668979622	2509.6369408068813
CLF	34	fr	fr	UH	11	0	0	0	0
CLF	34	fr	fr	UH	12	0.14714285714285713	359.53847623813647	1577.8568296132407	2770.813348507327
CLF	34	fr	fr	UH	13	0.11959183673469387	548.0828798021394	1670.7812052843994	2613.7975350303573
CLF	34	fr	fr	UH	14	0.1391156462585034	530.6414113602284	1681.916402737237	2581.5045129946766
CLF	34	fr	fr	UH	15	0.30866213151927435	501.57503457074193	1839.67130568639	2650.185325852063
CLF	34	fr	fr	UH	16	0.12648526077097505	471.1513758745833	1820.3785864644508	2614.9651842595713
CLF	34	fr	fr	UH	17	0.1958730158730159	441.0381862534328	1729.3784918830013	2445.8419753589624
CLF	34	fr	fr	UH	18	0.33201814058956913	471.33853671474435	1677.8969399398982	2480.173081529904
CLF	34	fr	fr	UH	19	0.22399092970521542	513.9105498700098	2015.7562477713382	2729.3665264611964
CLF	34	fr	fr	UH	20	0.3649659863945578	474.6114878336907	1680.7859633220287	2627.6717984182715
CLF	34	fr	fr	UH	21	0.44553287981859413	624.8975978411701	1821.5578092900564	2553.395889282967
CLF	34	fr	fr	UH	22	0.0957142857142857	538.1764060358337	1735.8921830445533	2702.515214317816
CLF	34	fr	fr	UH	23	0.1959863945578231	568.61840313427615	1700.2069446731698	2668.3350189763587
CLF	34	fr	fr	UH	24	0.13689342403628119	720.5014165229642	1714.8966746074718	2661.3758634133524
CLF	34	fr	fr	UH	25	0.13732426303854875	616.4062443062477	1777.7931121500703	2610.7940002566174
CLF	34	fr	fr	UH	26	0.22022675736961453	567.7791517521224	1715.1600980985309	2642.3983814001303
CLF	34	fr	fr	UH	27	0.14072562358276644	704.9586438975139	1469.6289542710838	2655.145163464525
CLF	34	fr	fr	UH	28	0.27392290249433104	601.5238534278511	1453.587704433988	2624.1747214287475
CLF	34	fr	fr	UH	29	0.19918367346938773	562.6266771242663	1610.3557715910915	2442.8997591311704
CLF	34	fr	fr	UH	30	0.30356009070294787	335.05998673167306	1698.1995286773558	2590.067882677349
CLF	34	fr	fr	UH	31	0.39526077097505663	368.92897650299415	1602.02432457097	2560.7161529274304
CLF	34	fr	fr	UH	32	0.2289795918367347	541.9221931798056	1647.1739599167659	2661.9399612673697
CLF	34	fr	fr	UH	33	0.19941043083900226	412.7070113289557	1678.7333614024406	2534.826872996322
CLF	34	fr	fr	UH	34	0.20643990929705217	618.0377776754342	1703.2567603694556	2603.902484746686
CLF	34	fr	fr	UH	35	0.12369614512471655	683.9241386540245	1631.1692192610142	2721.9255412683337
CLF	34	fr	fr	UH	36	1.2821541950113378	543.09837401842606	1593.168143938419	2608.881633763117
CLF	34	fr	fr	UH	37	0.17605442176870748	471.431166617387	1941.8269526339561	2741.9120003154762
CLF	34	fr	fr	UH	38	0.3225850340136054	492.443002586126	1583.1021636584794	2599.193429311786
CLF	34	fr	fr	UH	39	0.309297052154195	579.0646334031227	1823.1271232056802	2588.484853110831
CLF	34	fr	fr	UH	40	0.1892517006802721	366.61854097776785	1569.7064032268581	2511.3960789538123
CLF	34	fr	fr	UH	41	0.19054421768707483	516.1850561076304	1600.1687738468554	2562.4302003231273
CLF	34	fr	fr	UH	42	0.2515873015873016	437.8640820504455	1778.214010408543	2518.718883535588
CLF	34	fr	fr	UH	43	0.37603174603174605	544.1470522324923	1731.8752657235987	2563.907038371973
CLF	34	fr	fr	UH	44	0.21140589569160997	384.17929230120166	1345.7030881211726	2854.9937619768407
CLF	34	fr	fr	UH	45	0.23417233560090703	522.410450897696	1722.6130926421292	2575.4417405210525
CLF	34	fr	fr	UH	46	0.09675736961451248	505.1317188411511	1470.7982905124002	2425.1845979336467
CLF	34	fr	fr	UH	47	0	0	0	0
CLF	34	fr	fr	UH	48	0.20297052154195008	459.0574673968705	1570.067605732596	2727.3821313310373
CLF	34	fr	fr	UH	49	0.14179138321995463	486.2889956506637	1685.5186073171105	2860.380823840063
CLF	34	fr	fr	UH	50	0.570702947845805	699.4144866390741	1693.1989166569483	2804.130730803273
CLF	34	fr	fr	UH	51	0.1458503401360544	503.7562372543122	1829.0246104786595	2699.261122308426
CLF	34	fr	fr	UH	52	0.2760090702947846	664.7682511422031	1677.5831037363214	2694.2556094566103
CLF	34	fr	fr	UH	53	1.206643990929705	346.84262991679174	1689.417934514608	2642.216931584712
CLF	34	fr	fr	UH	54	0.19267573696145127	516.8070020138227	1403.3337183434874	2650.944479167948
CLF	34	fr	fr	UH	55	0.4452380952380952	571.4054898141699	1765.2101943871976	2733.6620950285715
CLF	34	fr	fr	UH	56	0.208843537414966	591.7693156649092	1760.3532124820288	2747.635101419999
CLF	34	fr	fr	UH	57	0.2782993197278911	502.5817229719728	1659.0896839048141	2508.9331537275775
CLF	34	fr	fr	UH	58	0.2576417233560091	517.4489848536127	1700.211077356633	2821.3174061032382
CLF	34	fr	fr	UH	59	0.4515646258503402	492.46518216665567	1582.6181848546446	2546.633116019685
CLF	34	fr	fr	UH	60	0.21573696145124718	521.3857016602177	1687.1964098422945	2952.4826090633533
CLF	34	fr	fr	UH	61	0.1931065759637188	537.7119029053711	1554.9694059566557	2616.5270788860025
CLF	34	fr	fr	UH	62	0.46412698412698417	562.5357447032862	1713.3939718443337	2702.801508019946
CLF	34	fr	fr	UH	63	0.24181405895691607	564.7248116161188	1768.87816330203	2700.7094903231673
CLF	34	fr	fr	UH	64	0.7536507936507937	543.5507425339898	1742.7558859409826	2556.2545345565995
CLF	34	fr	fr	UH	65	0.23702947845804986	436.60385830625364	1754.7589842980872	2601.8082576488405
CLF	34	fr	fr	UH	66	0	0	0	0
CLF	34	fr	fr	UH	67	0.21414965986394555	612.5093422562672	1536.1922058991222	2519.638211174799
CLF	34	fr	fr	UH	68	0.23551020408163267	601.9204873692207	1735.7030411361	2716.630027532895
CLF	34	fr	fr	UH	69	0.11006802721088435	463.3925441952241	1915.1739736415648	2726.683619104909
CLF	34	fr	fr	UH	70	0.2788208616780046	530.28011881332975	1497.0809088050253	2470.284252365778
CLF	34	fr	fr	UH	71	0.12092970521541949	441.8085857332396	1627.5987275043658	2532.581808084866
CLF	34	fr	fr	UH	72	0.1912018140589569	671.9626455374879	1752.4522565104628	2821.851154223356
CLF	34	fr	fr	UH	73	0.1135827664399093	533.130609107193	1219.7864712651544	2642.111311886254
CLF	34	fr	fr	UH	74	0.2788662131519274	644.7992292166081	1300.1683296303652	2543.0595748069477
CLF	34	fr	fr	UH	75	0.19394557823129252	638.7795756575127	1441.0316504666705	2735.3552325244923
CLF	34	fr	fr	UH	76	0.1272108843537415	566.2825485555537	1576.0718507933086	2583.390961590736
CLF	34	fr	fr	UH	77	0.1389342403628118	565.174497659627	1881.2546904370806	2566.4367673344063
CLF	34	fr	fr	UH	78	0.33371882086167803	431.63946675739027	1690.9684158701125	3059.21783937443
CLF	34	fr	fr	UH	79	0.21219954648526076	647.6714903021743	1512.2499374558095	2669.0324730143107
CLF	34	fr	fr	UH	80	1.0419274376417234	537.9232365818945	1730.1107648128743	2565.3820694287397
CLF	34	fr	fr	UH	81	0.3504761904761905	545.0967877860598	1657.7571428339097	2606.839558966223
CLF	34	fr	fr	UH	82	0.11553287981859409	592.6135887065427	1111.0670433207638	2585.4533797907166
CLF	34	fr	fr	UM	0	0	0	0	0
CLF	34	fr	fr	UM	0	0	0	0	0
CLF	34	fr	fr	UM	0	0	0	0	0
CLF	34	fr	fr	UM	0	0	0	0	0
CLF	34	fr	fr	UM	0	0	0	0	0
CLF	34	fr	fr	UM	0	0	0	0	0
CLF	34	fr	fr	UM	0	0	0	0	0
CLF	34	fr	fr	UM	0	0	0	0	0
CLF	34	fr	fr	UM	0	0	0	0	0
CLF	34	fr	fr	UM	0	0	0	0	0
CLF	34	fr	fr	UM	1	0.3454875283446712	373.1269100791219	1727.8315588594164	2577.6367282877673
CLF	34	fr	fr	UM	2	0.07970521541950112	514.8131178607506	1751.0365247581965	2783.7426097457114
CLF	34	fr	fr	UM	3	0.2260090702947846	724.9677833082649	1700.3284473955314	2598.474200513295
CLF	34	fr	fr	UM	4	0.2851700680272109	667.9783758086076	1644.6378556279233	2828.026940230448
CLF	34	fr	fr	UM	5	0.21798185941043083	439.2795029607682	1501.850812849009	2614.6548662537393
CLF	34	fr	fr	UM	6	0.13648526077097506	595.1296821219028	1484.5991428690058	2390.0943512101235
CLF	34	fr	fr	UM	7	0.14535147392290249	502.7748324171781	1515.267958689546	2759.5342318163885
CLF	34	fr	fr	UM	8	0.1275736961451247	510.6660392288949	1458.1160509795075	2467.2883992885677
CLF	34	fr	fr	UM	9	0.1430612244897959	479.5401225390658	1797.7322984222174	2498.6247842012244
CLF	34	fr	fr	UM	10	0.1633106575963719	638.1633490749789	1779.2900258940672	2717.24567112445
CLF	34	fr	fr	UM	11	0.18800453514739227	643.5088567207688	1525.1551170021496	2634.370529610852
CLF	34	fr	fr	UM	12	0.15795918367346937	573.2602428055749	1642.4728420052413	3040.2939203917113
CLF	34	fr	fr	UM	13	0.10265306122448978	525.1212350636422	1915.263784839315	2604.297658438572
CLF	34	fr	fr	UM	14	0.08444444444444443	672.5523841232153	1742.479862756443	2789.4454955615474
CLF	34	fr	fr	UM	15	0.20870748299319727	694.9394967740312	1750.9182097963178	2661.313367651909
CLF	34	fr	fr	UM	16	0.14487528344671202	505.43440489435136	1584.8571190958091	2634.878220406995
CLF	34	fr	fr	UM	17	0.12641723356009069	726.5792369298442	1587.0174606326134	2453.672612692374
CLF	34	fr	fr	UM	18	0.19215419501133787	507.3993962779776	1455.581083261267	2703.0052852712033
CLF	34	fr	fr	UM	19	0.09006802721088436	598.7442847387708	1963.9613167250197	2756.9968932920433
CLF	34	fr	fr	UM	20	0	0	0	0
GUE	39	fr	fr	UH	0	0	0	0	0
GUE	39	fr	fr	UH	0	0	0	0	0
GUE	39	fr	fr	UH	0	0	0	0	0
GUE	39	fr	fr	UH	0	0	0	0	0
GUE	39	fr	fr	UH	0	0	0	0	0
GUE	39	fr	fr	UH	0	0	0	0	0
GUE	39	fr	fr	UH	0	0	0	0	0
GUE	39	fr	fr	UH	0	0	0	0	0
GUE	39	fr	fr	UH	0	0	0	0	0
GUE	39	fr	fr	UH	0	0	0	0	0
GUE	39	fr	fr	UH	0	0	0	0	0
GUE	39	fr	fr	UH	0	0	0	0	0
GUE	39	fr	fr	UH	0	0	0	0	0
GUE	39	fr	fr	UH	0	0	0	0	0
GUE	39	fr	fr	UH	0	0	0	0	0
GUE	39	fr	fr	UH	0	0	0	0	0
GUE	39	fr	fr	UH	0	0	0	0	0
GUE	39	fr	fr	UH	0	0	0	0	0
GUE	39	fr	fr	UH	0	0	0	0	0
GUE	39	fr	fr	UH	0	0	0	0	0
GUE	39	fr	fr	UH	0	0	0	0	0
GUE	39	fr	fr	UH	1	0.45977324263038555	576.8731699577239	1824.8193658089453	2867.3319031027418
GUE	39	fr	fr	UH	2	0.49142857142857144	385.19822032737045	1400.6413164640944	2392.2145893999464
GUE	39	fr	fr	UH	3	0.5108843537414967	478.9965352971639	1579.60778146236	2595.486507858624
GUE	39	fr	fr	UH	4	0.40757369614512473	585.7473482002207	1714.4901628915234	2695.212356375337
GUE	39	fr	fr	UH	5	0.3055555555555556	580.4737732472979	1748.7781057955494	2637.186516475891
GUE	39	fr	fr	UH	6	0.19829931972789114	539.3382924611138	1742.2599227759638	2697.374307021687
GUE	39	fr	fr	UH	7	0.204172335600907	467.2095792798941	1685.8469672302363	2576.243039600321
GUE	39	fr	fr	UH	8	0.7160090702947846	517.5768921586528	1687.9942604551056	2506.754197405831
GUE	39	fr	fr	UH	9	0.1405442176870748	569.2217599357838	1640.1608524739597	2487.204783939758
GUE	39	fr	fr	UH	10	0.4177097505668934	566.230939251531	1591.4047795567744	2547.5244424230955
GUE	39	fr	fr	UH	100	0.6112925170068028	383.77254545771	1617.8121336964698	2933.0163625079103
GUE	39	fr	fr	UH	101	0.35412698412698407	386.3987636899696	1472.513641987001	2619.766497489919
GUE	39	fr	fr	UH	102	0.21122448979591837	587.7988074638233	1457.0300041039563	2837.0561569719957
GUE	39	fr	fr	UH	103	0.14997732426303853	459.5719507081816	1675.660998248316	2516.6784757162472
GUE	39	fr	fr	UH	104	0.4405215419501134	461.7406973789005	1817.219617552319	2655.3707137818888
GUE	39	fr	fr	UH	105	0.5638775510204082	420.65081454353253	1762.5702876511232	2629.1917128346913
GUE	39	fr	fr	UH	106	0.5388208616780046	494.7583771857554	1697.7903193620643	2708.1768338845895
GUE	39	fr	fr	UH	107	0.5948979591836735	430.5310230715265	1561.4490936385566	2468.8870450660565
GUE	39	fr	fr	UH	108	0.20174603174603176	461.8455920086546	1574.2249905033884	2557.8134976093443
GUE	39	fr	fr	UH	109	0.45195011337868485	561.3726682789103	1669.4442688485758	2651.619109720613
GUE	39	fr	fr	UH	11	0.42253968253968255	312.7101840970946	1669.2768033236948	2674.009890652701
GUE	39	fr	fr	UH	110	0.4489569160997733	654.0892938167146	1750.1780266526982	2920.0789697062974
GUE	39	fr	fr	UH	111	0.20489795918367346	466.7767853019226	1383.8188133511635	2497.044809797031
GUE	39	fr	fr	UH	112	0.35299319727891154	570.7496988297705	1553.5362021155804	2618.637282116314
GUE	39	fr	fr	UH	113	1.448843537414966	364.10210445798396	1658.1561719643312	2634.753294926532
GUE	39	fr	fr	UH	114	0.17371882086167797	447.70387382982625	1481.3627562463787	2521.601075476127
GUE	39	fr	fr	UH	115	0.1769160997732426	469.17653053672086	1417.604755376971	2728.6346964440154
GUE	39	fr	fr	UH	116	0.33632653061224493	592.7992833924313	1777.2062510803255	2603.2803270841255
GUE	39	fr	fr	UH	117	0.3490702947845805	540.3173694455891	1613.145929618968	2650.438969461684
GUE	39	fr	fr	UH	118	0.17859410430839004	516.1401815829784	1674.3369987484334	2751.517559884203
GUE	39	fr	fr	UH	119	0.2732199546485261	460.2411621071037	1649.052748387675	2673.523043509753
GUE	39	fr	fr	UH	12	0.2531519274376417	471.8319473762757	1752.476132275092	2576.227175809293
GUE	39	fr	fr	UH	120	0.4205668934240363	538.4644693860736	1640.790077303436	2536.842737281273
GUE	39	fr	fr	UH	13	0.43546485260770973	468.20027975098236	1621.6444986243937	2441.351647794358
GUE	39	fr	fr	UH	14	0.5354648526077098	484.37444480907396	1617.1183570503124	2684.8786973051688
GUE	39	fr	fr	UH	15	0.773015873015873	452.8589463728532	1571.3063416781094	2612.6555739917962
GUE	39	fr	fr	UH	16	0.12820861678004536	414.92262859664174	1548.5562062459749	2560.80256129645
GUE	39	fr	fr	UH	17	0.38009070294784575	518.0398697475973	1573.8589746062994	2580.4674533712105
GUE	39	fr	fr	UH	18	0.9920408163265307	381.74529073741263	1569.5764143502038	2615.246065390322
GUE	39	fr	fr	UH	19	0.3117233560090703	475.4332470018172	1519.8480184727127	2452.5062856449736
GUE	39	fr	fr	UH	20	0.6665759637188209	549.5233454713623	1683.7863526305932	2782.9053300577943
GUE	39	fr	fr	UH	21	0.5142630385487529	517.0416767583839	1651.596947873743	2642.0398231747813
GUE	39	fr	fr	UH	22	0.19628117913832197	406.991141355858	1736.5600081955229	2807.3541579647094
GUE	39	fr	fr	UH	23	0.2805442176870748	474.5755026021304	1561.424474930965	2552.500034412338
GUE	39	fr	fr	UH	24	0.7514285714285714	519.7109135180847	1608.931522410133	2546.3717744425117
GUE	39	fr	fr	UH	25	0.16773242630385485	458.01252275771907	1889.0065354669368	2859.9401874796763
GUE	39	fr	fr	UH	26	0.31775510204081636	519.0803275464812	1619.5835547192673	2582.9348694285136
GUE	39	fr	fr	UH	27	0.17909297052154197	454.24565592620365	1667.3970703626935	2736.4809568955834
GUE	39	fr	fr	UH	28	0.4152380952380953	458.4728101539218	1527.661468286431	2638.2600105765955
GUE	39	fr	fr	UH	29	0.9542857142857143	409.44071291583197	1399.2031987541554	2420.3275724261507
GUE	39	fr	fr	UH	30	0.4324036281179139	375.0274608394878	1618.45652926074	2415.8918796564712
GUE	39	fr	fr	UH	31	0.21253968253968256	507.02462573772215	1538.9985180270564	2532.4783163373695
GUE	39	fr	fr	UH	32	0	0	0	0
GUE	39	fr	fr	UH	33	0.43854875283446715	449.34437969841974	1540.1526279059353	2670.727432659018
GUE	39	fr	fr	UH	34	0.6765079365079365	446.5241850655273	1660.7277857582978	2553.8733034049087
GUE	39	fr	fr	UH	35	0.1677551020408163	589.7971468355347	1493.5293456894406	2744.04360850605
GUE	39	fr	fr	UH	36	0.2797052154195011	500.97884715180675	1764.527838276316	2678.9205308884034
GUE	39	fr	fr	UH	37	0.453015873015873	463.1017803874968	1559.5227926948205	2491.756767206109
GUE	39	fr	fr	UH	38	0.5799773242630386	395.0089165914784	1580.526417563855	2801.962572980789
GUE	39	fr	fr	UH	39	0.20594104308390024	485.0490585151255	1419.3675639618589	2567.525465217088
GUE	39	fr	fr	UH	40	0.3842630385487529	442.5179572915139	1583.4282283848054	2644.825783580642
GUE	39	fr	fr	UH	41	0.3012244897959183	426.259629780408	1775.2094014549734	2624.3728025248747
GUE	39	fr	fr	UH	42	0.29780045351473927	565.5084311652248	1631.9602725786283	2685.6429470431353
GUE	39	fr	fr	UH	43	0.6943083900226757	402.40066489782805	1624.5968430213713	2550.164228198485
GUE	39	fr	fr	UH	44	0.13285714285714284	492.4635790182646	1650.1378083166499	2673.954347990863
GUE	39	fr	fr	UH	45	0.38374149659863943	444.03572917865375	1650.621391061872	2318.5895447438747
GUE	39	fr	fr	UH	46	0.2182766439909297	492.9653174388604	1499.3975701627742	2606.62988442385
GUE	39	fr	fr	UH	47	0.23020408163265307	414.5133713756246	1499.0161545878886	2568.2007795428635
GUE	39	fr	fr	UH	48	0.25140589569161	443.592079437851	1360.3075861613013	2792.0632868125895
GUE	39	fr	fr	UH	49	0.2948072562358277	547.9761364141045	1877.3877048263394	2794.585834797873
GUE	39	fr	fr	UH	50	0.6396145124716553	382.17207150238875	1617.9089721000946	2608.506940936998
GUE	39	fr	fr	UH	51	0.14936507936507937	424.5058530882237	1388.8231785512758	2460.396581745552
GUE	39	fr	fr	UH	52	0.4449433106575964	474.2168032398673	1737.5467308434677	2714.8011510887804
GUE	39	fr	fr	UH	53	0.23893424036281177	483.03023847028004	1574.3287360635939	2694.3939120375917
GUE	39	fr	fr	UH	54	0.2621315192743764	453.0241248503701	1475.6707873793773	2592.6334535468422
GUE	39	fr	fr	UH	55	0.4057596371882086	436.58175480070713	1512.6934607803018	2492.56877750487
GUE	39	fr	fr	UH	56	0.3575736961451247	480.8377420351751	1558.5841468077012	2641.496594697455
GUE	39	fr	fr	UH	57	0.16895691609977323	480.67455951253123	1765.3009323796216	2866.257160924032
GUE	39	fr	fr	UH	58	0.2926984126984127	477.3342041327286	1734.3324790045326	2709.0638019031417
GUE	39	fr	fr	UH	59	0.28065759637188203	348.5299705488288	1610.6615230346881	2643.65324389715
GUE	39	fr	fr	UH	60	0.1864625850340136	426.35672461109607	1620.179756076921	2710.1148094609525
GUE	39	fr	fr	UH	61	0.4274376417233561	463.3637862362719	1494.6935305731959	2623.7939178515817
GUE	39	fr	fr	UH	62	0.6827437641723356	488.94394935338977	1768.8835280883306	2668.596083526695
GUE	39	fr	fr	UH	63	0.7611791383219955	326.6404524692739	1629.0203350450386	2556.767294939619
GUE	39	fr	fr	UH	64	0.30036281179138324	553.3385531525381	1667.6099823546688	2703.177910617319
GUE	39	fr	fr	UH	65	0.4075963718820862	487.7497744164838	1623.3539739481334	2642.6103160166676
GUE	39	fr	fr	UH	66	0.2829931972789116	330.04004622193963	1561.0323412796088	2526.956635328389
GUE	39	fr	fr	UH	67	0.3232426303854875	467.3564527424599	1483.4740192970573	2631.478591539336
GUE	39	fr	fr	UH	68	0.17188208616780046	460.0858078539673	1602.7421000234835	2566.5579629638214
GUE	39	fr	fr	UH	69	0.5419047619047619	405.42781257679377	1567.1944381837843	2671.097969690931
GUE	39	fr	fr	UH	70	0.30181405895691604	325.0083095090059	1615.5464793675733	2774.028656861139
GUE	39	fr	fr	UH	71	0.4866666666666667	453.1352975312929	1607.444109127408	2733.6979100545404
GUE	39	fr	fr	UH	72	0.5765079365079365	532.0692163569358	1626.0118910632925	2582.148191732261
GUE	39	fr	fr	UH	73	0.16179138321995465	393.577883854883	1535.1793175973255	2836.0974321852987
GUE	39	fr	fr	UH	74	0.5079818594104308	481.30088422931635	1565.5489314024599	2596.9166626602314
GUE	39	fr	fr	UH	75	0.2527210884353741	497.7567519030244	1391.015550258774	2915.7057886301573
GUE	39	fr	fr	UH	76	0.29526077097505665	514.588499006274	1697.6279004642897	2467.923079503979
GUE	39	fr	fr	UH	77	0.2851700680272109	442.6314177969767	1659.472184425544	2595.756977523378
GUE	39	fr	fr	UH	78	0.46165532879818594	371.6115340107401	1537.82146949067	2556.4124756812607
GUE	39	fr	fr	UH	79	0.30671201814058957	428.814849652891	1696.6278367677637	2563.809571676444
GUE	39	fr	fr	UH	80	0	0	0	0
GUE	39	fr	fr	UH	81	0.29417233560090705	365.21647235495135	1734.2660717232309	2825.3205021789163
GUE	39	fr	fr	UH	82	0.18306122448979592	378.96358974861676	1584.2240272795598	2731.6698665180647
GUE	39	fr	fr	UH	83	0.3414512471655329	566.7584755782528	1669.4332619403174	2710.5141939191317
GUE	39	fr	fr	UH	84	0.3049206349206349	566.7471578987094	1596.9759214019834	2588.60159058533
GUE	39	fr	fr	UH	85	0.1680952380952381	563.7738596397751	1655.35752023849	2621.10501747412
GUE	39	fr	fr	UH	86	0.17997732426303856	555.4040758287529	1699.924492616174	2636.368685603554
GUE	39	fr	fr	UH	87	0.32274376417233563	423.963379516155	1630.0478924168071	2558.732725795724
GUE	39	fr	fr	UH	88	0.3155555555555556	617.9905393414872	1612.5309657915527	2669.3243364858617
GUE	39	fr	fr	UH	89	0.29725623582766436	586.533319901506	1701.080455473452	2744.369062928593
GUE	39	fr	fr	UH	90	0.48049886621315196	431.92730461190285	1506.6042029085263	2544.120841748435
GUE	39	fr	fr	UH	91	0.23120181405895693	366.12210131108947	1815.1478001794806	2940.14461560551
GUE	39	fr	fr	UH	92	0.3082086167800453	310.9824265595564	1610.7374424928971	2791.016868549923
GUE	39	fr	fr	UH	93	0.836984126984127	477.5311606149357	1519.5138474652078	2671.8599570159486
GUE	39	fr	fr	UH	94	0.2632199546485261	517.0597356049003	1524.4157180908262	2556.811801567361
GUE	39	fr	fr	UH	95	0.7984580498866214	353.9254148259277	1659.944002521334	2710.5384756796757
GUE	39	fr	fr	UH	96	0.9651473922902495	538.0017239483236	1749.2788454829752	2641.2722013597586
GUE	39	fr	fr	UH	97	0.23829931972789117	452.7123119012619	1609.125358699724	2694.3980500628813
GUE	39	fr	fr	UH	98	0.21927437641723355	483.70331846749247	1304.5679203056807	2333.9706812927798
GUE	39	fr	fr	UH	99	0.6647845804988662	491.8386512906784	1517.6414270934774	2712.5406628627925
GUE	39	fr	fr	UM	0	0	0	0	0
GUE	39	fr	fr	UM	0	0	0	0	0
GUE	39	fr	fr	UM	0	0	0	0	0
GUE	39	fr	fr	UM	0	0	0	0	0
GUE	39	fr	fr	UM	0	0	0	0	0
GUE	39	fr	fr	UM	0	0	0	0	0
GUE	39	fr	fr	UM	0	0	0	0	0
GUE	39	fr	fr	UM	1	0.2941950113378685	402.0106479202255	1463.1652998700722	2561.964593842101
GUE	39	fr	fr	UM	2	0.4883673469387755	564.086732932127	1620.7770361193561	2589.9051785233332
GUE	39	fr	fr	UM	3	0.22507936507936507	500.9575334062246	1544.035382824948	2579.370953141171
GUE	39	fr	fr	UM	4	0.3862358276643991	521.5341331989064	1661.6251452789134	2642.6372756931682
GUE	39	fr	fr	UM	5	0.5691836734693878	387.2345880745165	1620.645311717536	2575.4769546900507
GUE	39	fr	fr	UM	6	0.336530612244898	490.99677723549195	1570.5400173757664	2498.498886207874
GUE	39	fr	fr	UM	7	0.4969160997732427	448.22714602111125	1603.5393299380141	2615.7916866191613
GUE	39	fr	fr	UM	8	0.5784353741496598	492.75134819479945	1544.4793905955598	2532.0874198748534
GUE	39	fr	fr	UM	9	0.45108843537414967	496.71560949744656	1627.290691484071	2605.5674508848792
GUE	39	fr	fr	UM	10	0.3760544217687075	424.6391992416923	1555.1832417531275	2635.6714250334685
GUE	39	fr	fr	UM	11	0.4711337868480726	458.88747997101484	1704.885509174006	2596.2621471182847
GUE	39	fr	fr	UM	12	0.4972789115646259	449.78274539116615	1705.2053538371258	2622.514412927294
GUE	39	fr	fr	UM	13	0.40519274376417236	587.5120406346764	1646.543418518048	2508.375134082922
GUE	39	fr	fr	UM	14	0.579795918367347	481.5036261255893	1664.713095387606	2700.4596376491018
GUE	39	fr	fr	UM	15	0.23936507936507936	500.02766028302244	1677.426120775121	2753.6769181540703
GUE	39	fr	fr	UM	16	0.3421541950113378	471.7641405063001	1544.8331469155394	2512.5622090514134
GUE	39	fr	fr	UM	17	0.4519954648526078	538.2070026093859	1601.8509729723949	2581.740039360982
GUE	39	fr	fr	UM	18	0.2537414965986394	412.6660346857348	1624.004925566954	2755.171510093088
GUE	39	fr	fr	UM	19	0.2201814058956916	492.83277557828075	1626.4335366759742	2598.27747198037
GUE	39	fr	fr	UM	20	0.3848526077097506	481.2902778331687	1656.5480266862592	2722.3808339130032
GUE	39	fr	fr	UM	21	0.30764172335600903	511.7724612156804	1461.7690343860363	2719.7513212817107
GUE	39	fr	fr	UM	22	0.3630385487528345	458.3145248626445	1497.9025360688984	2620.600348731235
GUE	39	fr	fr	UM	23	0.22614512471655326	544.575743883409	1545.3221359799486	2570.297482306169
GUE	39	fr	fr	UM	24	0.2863718820861678	467.79139322827166	1569.4246763573412	2592.678106010617
GUE	39	fr	fr	UM	25	0.3174149659863945	449.93337581235204	1445.1546416624449	2556.2426707247355
INE	34	dt	fr	UH	0	0	0	0	0
INE	34	dt	fr	UH	0	0	0	0	0
INE	34	dt	fr	UH	0	0	0	0	0
INE	34	dt	fr	UH	0	0	0	0	0
INE	34	dt	fr	UH	0	0	0	0	0
INE	34	dt	fr	UH	0	0	0	0	0
INE	34	dt	fr	UH	0	0	0	0	0
INE	34	dt	fr	UH	0	0	0	0	0
INE	34	dt	fr	UH	0	0	0	0	0
INE	34	dt	fr	UH	0	0	0	0	0
INE	34	dt	fr	UH	0	0	0	0	0
INE	34	dt	fr	UH	0	0	0	0	0
INE	34	dt	fr	UH	0	0	0	0	0
INE	34	dt	fr	UH	0	0	0	0	0
INE	34	dt	fr	UH	0	0	0	0	0
INE	34	dt	fr	UH	0	0	0	0	0
INE	34	dt	fr	UH	0	0	0	0	0
INE	34	dt	fr	UH	0	0	0	0	0
INE	34	dt	fr	UH	0	0	0	0	0
INE	34	dt	fr	UH	0	0	0	0	0
INE	34	dt	fr	UH	0	0	0	0	0
INE	34	dt	fr	UH	0	0	0	0	0
INE	34	dt	fr	UH	1	0.752108843537415	805.1790806644303	1648.2488787485722	2918.3739414376632
INE	34	dt	fr	UH	2	0.2551020408163265	534.6648171948474	1671.8512497414208	3149.8817274125345
INE	34	dt	fr	UH	3	0.5253968253968254	679.7400519244787	1800.7408257972365	2960.7087798412435
INE	34	dt	fr	UH	4	0	0	0	0
INE	34	dt	fr	UH	5	0.7500680272108844	486.2222917054596	1751.23999579796	2960.3250004930533
INE	34	dt	fr	UH	6	0.2629931972789116	473.82078355987227	1536.6237929530894	2764.2524262024217
INE	34	dt	fr	UH	7	0.1607936507936508	497.4471835509537	1811.6518808839642	2798.8677121761357
INE	34	dt	fr	UH	8	0.21492063492063493	489.1476336547396	1630.7840926888266	2920.102478529327
INE	34	dt	fr	UH	9	0.38451247165532876	498.53769944964824	1640.3900370292263	2812.3013970754178
INE	34	dt	fr	UH	10	0.48875283446712026	594.3695053574259	1539.1713033871551	2833.712903620043
INE	34	dt	fr	UH	100	0.20081632653061224	556.5158598469557	1815.6066178939295	2896.076967820556
INE	34	dt	fr	UH	101	0.20303854875283447	478.9263171973376	1567.7763981570042	2841.6776900399173
INE	34	dt	fr	UH	102	0.29684807256235823	537.9565341748947	1435.1897818717703	2753.6272428573943
INE	34	dt	fr	UH	103	0.2603628117913832	708.6159564078034	1430.09035752721	2799.230965740877
INE	34	dt	fr	UH	104	0.0922675736961451	542.0586925137183	1487.9323814229147	2808.1513103120337
INE	34	dt	fr	UH	105	0.20786848072562356	498.4387261966757	1664.7378226275432	2744.248207199257
INE	34	dt	fr	UH	11	0.2419501133786848	565.3503964463742	1719.0754449128362	2963.892249711121
INE	34	dt	fr	UH	12	0.6791609977324263	474.94777831731113	1579.4982112407451	2931.728868321491
INE	34	dt	fr	UH	13	0.4278004535147393	537.3990074330528	1465.4634831017902	2765.3635975088077
INE	34	dt	fr	UH	14	0.5881179138321996	438.6114736478013	1707.1877999964609	3020.4759389052965
INE	34	dt	fr	UH	15	0.5384353741496599	513.4917218991413	1448.78759073689	2788.054925331054
INE	34	dt	fr	UH	16	0.4130385487528345	648.1081916801709	1757.093869337128	2915.3832224569323
INE	34	dt	fr	UH	17	0.28482993197278916	422.7718083311363	1733.5523786404142	2825.673841512599
INE	34	dt	fr	UH	18	0.5073696145124716	543.4921212370423	1655.349018358796	2877.2958534483587
INE	34	dt	fr	UH	19	0	0	0	0
INE	34	dt	fr	UH	20	0.6209750566893424	515.3443400971682	1541.5802567306812	2881.3504241928513
INE	34	dt	fr	UH	21	0.22691609977324265	470.2625234517196	1743.356235761757	2914.832359439053
INE	34	dt	fr	UH	22	0.36882086167800454	462.1411852674467	1635.985095842778	2750.6158600789677
INE	34	dt	fr	UH	23	0.23065759637188207	471.33295037123173	1562.7028354582997	2781.9351880195636
INE	34	dt	fr	UH	24	0.3663492063492063	484.5765410485152	1787.2570544597902	2816.2146279401295
INE	34	dt	fr	UH	25	0.3159637188208617	470.10907894671885	1697.483769066905	2932.868512791503
INE	34	dt	fr	UH	26	0.5523356009070295	539.6211791906328	1617.4249216568778	2696.783068611072
INE	34	dt	fr	UH	27	0.2845578231292517	470.736456939087	1627.2606945769994	2699.1072993494913
INE	34	dt	fr	UH	28	0.0761904761904762	467.56113469182276	1514.5864455666347	2984.3260097351913
INE	34	dt	fr	UH	29	0.4445351473922903	699.451220431831	1537.4651305069788	3170.3256204762383
INE	34	dt	fr	UH	30	0.4810884353741497	569.4430758955922	1646.959708059291	2757.6982509169766
INE	34	dt	fr	UH	31	0.20467120181405893	645.9369995925528	1478.5983581187118	2706.1365092399815
INE	34	dt	fr	UH	32	0.23160997732426306	835.2283261447847	1789.6415039592648	3033.020898523752
INE	34	dt	fr	UH	33	0.32897959183673464	597.2543786926342	1444.6588776159113	2789.3352026437437
INE	34	dt	fr	UH	34	0.5578458049886622	537.4343003879214	1559.2604702354386	2705.7950379256004
INE	34	dt	fr	UH	35	0.4744897959183674	504.3374460725784	1525.849167742461	2742.7269288017233
INE	34	dt	fr	UH	36	0.48834467120181413	574.6304688169041	1683.1440395145312	2762.202554282158
INE	34	dt	fr	UH	37	0.3795918367346939	474.80028480525993	1700.3622358942664	2867.8820675373267
INE	34	dt	fr	UH	38	0.38501133786848074	503.70472519946514	1701.353217087742	3001.8745639548574
INE	34	dt	fr	UH	39	0.12002267573696146	511.2020907890729	1632.5137125233084	2807.3049438027783
INE	34	dt	fr	UH	40	0.2582993197278911	477.3799348919103	1749.840211658101	2707.1548250470473
INE	34	dt	fr	UH	41	0.3225170068027211	465.78664510894623	1671.995062639966	3014.0355952626333
INE	34	dt	fr	UH	42	0.2627891156462585	460.71156554336943	1589.857061215609	2826.7415828196204
INE	34	dt	fr	UH	43	0.23900226757369616	708.5411341484853	1514.9504634344778	2811.9114466403626
INE	34	dt	fr	UH	44	0.5435374149659864	684.5264343203336	1602.3979274326302	3178.6597222447635
INE	34	dt	fr	UH	45	0.27494331065759636	415.6791244653325	1640.6000039774294	2950.760948691027
INE	34	dt	fr	UH	46	0.5151473922902494	664.2760715536928	1539.1024686527905	2830.5494485585814
INE	34	dt	fr	UH	47	0.3818140589569161	503.4661453071907	1595.3775684624447	2670.9673271522497
INE	34	dt	fr	UH	48	0.21106575963718818	548.4415333236966	1656.4277401593301	2776.0551941113513
INE	34	dt	fr	UH	49	0.3029478458049887	576.3733625280411	1719.3360808427174	2924.5198245473894
INE	34	dt	fr	UH	50	0.25276643990929704	515.4208925773038	1548.5856353149416	2721.571415049128
INE	34	dt	fr	UH	51	0.28902494331065764	499.44349104516255	1765.023291670123	3028.3803817943335
INE	34	dt	fr	UH	52	0.27659863945578234	564.5829821641588	1743.1022757446588	2927.305455229858
INE	34	dt	fr	UH	53	0.6153287981859411	487.5808344158249	1491.871655603132	2576.150982637268
INE	34	dt	fr	UH	54	0.6284126984126984	560.5153549377794	1576.4390726301845	2821.7235172834307
INE	34	dt	fr	UH	55	0.19242630385487527	530.0751712996022	1692.2055247593491	2747.2349442893697
INE	34	dt	fr	UH	56	0.41818594104308393	499.91432794250807	1636.1551059980416	2699.2777360155414
INE	34	dt	fr	UH	57	0.3621768707482993	540.525432404844	1681.694876052001	2698.7016103696114
INE	34	dt	fr	UH	58	0.22947845804988662	516.2585365132413	1784.332866476536	2825.8922316427825
INE	34	dt	fr	UH	59	0	0	0	0
INE	34	dt	fr	UH	60	0.2764399092970522	508.6234326247767	1683.792273313326	2946.3329404284527
INE	34	dt	fr	UH	61	0.19034013605442177	506.75349183609706	1704.977894027505	2993.5234191047616
INE	34	dt	fr	UH	62	0.4722448979591837	545.540869596805	1847.7778855624579	3015.6920293457356
INE	34	dt	fr	UH	63	0.1527891156462585	579.3332296232204	1749.2266117278714	2819.655357754732
INE	34	dt	fr	UH	64	0.12061224489795919	637.4745510401447	1649.3794939509112	2715.0302831409235
INE	34	dt	fr	UH	65	0.2395238095238095	493.9680397840332	1409.107001457573	2840.762466719507
INE	34	dt	fr	UH	66	0	0	0	0
INE	34	dt	fr	UH	67	0.23448979591836736	572.7248480547165	1803.6809815345719	2982.092418788472
INE	34	dt	fr	UH	68	0.3821088435374149	585.1263104531654	1400.5537433008358	2909.926498469761
INE	34	dt	fr	UH	69	0.22578231292517006	509.9261836628434	1965.505264851324	2933.2581882749037
INE	34	dt	fr	UH	70	0.3075283446712018	499.78475422360947	1562.3946303502003	2937.2768836510904
INE	34	dt	fr	UH	71	0.34201814058956914	553.1893965463082	1645.0440931634466	2835.6216729129746
INE	34	dt	fr	UH	72	0.28866213151927433	536.9310161435719	1714.310205678803	2914.37350003284
INE	34	dt	fr	UH	73	0.25535147392290247	546.4704093040793	1554.3499762087843	2889.716010481691
INE	34	dt	fr	UH	74	0.17242630385487526	583.6614895755342	1483.7411167484054	3039.521747143513
INE	34	dt	fr	UH	75	0.24750566893424034	527.9351666817178	1497.4551386807461	2865.608693687331
INE	34	dt	fr	UH	76	0.17954648526077097	498.89183819751	1695.7321444401414	2888.922522575143
INE	34	dt	fr	UH	77	0.24573696145124715	561.4327876437563	1481.3760688688876	2954.5208833531883
INE	34	dt	fr	UH	78	0.22165532879818592	495.24641389665624	1381.7854647498684	2892.8076217696625
INE	34	dt	fr	UH	79	0.20263038548752835	634.3792928519716	1397.6801268488243	2825.0206296422366
INE	34	dt	fr	UH	80	0.2783219954648526	373.0925979209541	1472.8398110396945	2664.5216096179056
INE	34	dt	fr	UH	81	0.22569160997732426	523.301425826204	1443.9747244404793	2723.9454155381736
INE	34	dt	fr	UH	82	0.40145124716553293	567.3033078763268	1699.707485873635	2796.7248847558367
INE	34	dt	fr	UH	83	0.23519274376417235	487.48871026788396	1553.5015591673896	2703.713781977314
INE	34	dt	fr	UH	84	0.12607709750566892	478.0861087479157	1764.702658686418	3055.7236755992094
INE	34	dt	fr	UH	85	0.18594104308390022	559.7815602805979	1504.298912933274	2862.81193715314
INE	34	dt	fr	UH	86	0.3545351473922902	663.0166608154725	1580.5627096553771	2761.0205986061205
INE	34	dt	fr	UH	87	0.23448979591836736	486.3341103124366	1405.9623004442628	2687.8242035708654
INE	34	dt	fr	UH	88	0.2549886621315193	590.4831839498042	1798.4995210460356	2886.0231843624347
INE	34	dt	fr	UH	89	0.2705668934240363	526.2225110529508	1760.350815928301	2876.6643502673837
INE	34	dt	fr	UH	90	0.1772562358276644	581.1103357135302	1503.7174020067507	3138.451749922387
INE	34	dt	fr	UH	91	0	0	0	0
INE	34	dt	fr	UH	92	0.40088435374149667	552.6952137755084	1760.2754607498796	2914.0335406709755
INE	34	dt	fr	UH	93	0.21473922902494333	576.9378650460877	1727.492935632597	2819.2413102509795
INE	34	dt	fr	UH	94	0.23281179138321997	521.2787604195307	1648.4281636136916	2744.9840926869565
INE	34	dt	fr	UH	95	0	0	0	0
INE	34	dt	fr	UH	96	0.20630385487528344	574.325504347373	1652.6368302042142	2885.459651429962
INE	34	dt	fr	UH	97	0.17535147392290248	546.1073704431609	1843.2497230310626	2964.4930826764116
INE	34	dt	fr	UH	98	0.16501133786848074	536.1091812529426	1818.7084366834858	2949.149799706339
INE	34	dt	fr	UH	99	0.33594104308390027	747.8705813104464	1705.7021666743105	2813.7185264672908
INE	34	dt	fr	UM	0	0	0	0	0
INE	34	dt	fr	UM	0	0	0	0	0
INE	34	dt	fr	UM	0	0	0	0	0
INE	34	dt	fr	UM	1	0.11736961451247166	766.296079759313	1754.1206124487676	2970.7352926807675
INE	34	dt	fr	UM	2	0.3256235827664399	791.9345363475527	1559.5174403178933	2885.067392904005
INE	34	dt	fr	UM	3	0	0	0	0
INE	34	dt	fr	UM	4	0.1401814058956916	444.94553391939576	1639.5425922812617	2811.3678200207337
INE	34	dt	fr	UM	5	0	0	0	0
INE	34	dt	fr	UM	6	0	0	0	0
INE	34	dt	fr	UM	7	0.14752834467120182	773.4346362227384	1640.0640680704355	2878.019057689987
INE	34	dt	fr	UM	8	0.19705215419501135	701.3887385623067	1566.6561237571796	2809.4503053345047
INE	34	dt	fr	UM	9	0.27507936507936503	979.9635833403381	1451.2652047410866	3023.987641196794
INE	34	dt	fr	UM	10	0.27385487528344665	695.475833924788	1617.2318686146896	2905.241571139963
INE	34	dt	fr	UM	11	0.23346938775510204	587.8081397724682	1773.8971495200303	2898.335885839628
INE	34	dt	fr	UM	12	0.1384580498866213	443.05126808252965	1240.040676067841	2630.066064977899
INE	34	dt	fr	UM	13	0	0	0	0
INE	34	dt	fr	UM	14	0.2422902494331066	523.61263172418	1502.449973274142	2898.3290678316616
INE	34	dt	fr	UM	15	0.2941496598639456	570.3010771296038	1311.1798361574342	2845.950081718196
INE	34	dt	fr	UM	16	0.4976417233560091	668.9226467232444	1432.371751374895	3145.1366298363814
INE	34	dt	fr	UM	17	0	0	0	0
INE	34	dt	fr	UM	18	0.47324263038548753	433.11331927400056	1510.5810213792201	2562.174669853849
INE	34	dt	fr	UM	19	0.09229024943310657	496.3483749468972	1504.7506875355716	2875.7559030576335
INE	34	dt	fr	UM	20	0.10215419501133785	788.6029898701729	1506.133647001126	3193.7473327560488
ING	35	fr	fr	UH	0	0	0	0	0
ING	35	fr	fr	UH	0	0	0	0	0
ING	35	fr	fr	UH	0	0	0	0	0
ING	35	fr	fr	UH	0	0	0	0	0
ING	35	fr	fr	UH	0	0	0	0	0
ING	35	fr	fr	UH	0	0	0	0	0
ING	35	fr	fr	UH	0	0	0	0	0
ING	35	fr	fr	UH	0	0	0	0	0
ING	35	fr	fr	UH	0	0	0	0	0
ING	35	fr	fr	UH	0	0	0	0	0
ING	35	fr	fr	UH	0	0	0	0	0
ING	35	fr	fr	UH	1	0.2631065759637188	627.3267809673155	1633.8374054908456	2618.6873263921807
ING	35	fr	fr	UH	2	0.3197278911564626	540.2279140536017	1534.271689807476	2629.8120058885147
ING	35	fr	fr	UH	3	0.26040816326530614	534.9805483790799	1497.1405940460886	2570.9331875830967
ING	35	fr	fr	UH	4	0.3838321995464853	666.780148464308	1550.321532488445	2429.5549701290233
ING	35	fr	fr	UH	5	0.5829931972789116	636.1471899772665	1501.1729066036346	2734.807901163683
ING	35	fr	fr	UH	6	0.6773469387755102	704.4750351889817	1559.2611561150725	2704.0362739927377
ING	35	fr	fr	UH	7	0.7106122448979592	575.5608466242635	1558.9141725787533	2741.91789901126
ING	35	fr	fr	UH	8	0.2513378684807256	694.6633828935072	1497.1497310925827	2825.13431625991
ING	35	fr	fr	UH	9	0.225827664399093	539.4601294336574	1562.0428864380594	2614.7866572050634
ING	35	fr	fr	UH	10	0.729342403628118	615.422304089536	1526.935540905888	2549.6124124699645
ING	35	fr	fr	UH	11	0.2756009070294785	672.3591702997938	1544.0947973750142	2531.88054332439
ING	35	fr	fr	UH	12	0.21657596371882085	580.2255287589488	1519.466264092189	2628.0977977543644
ING	35	fr	fr	UH	13	0.48317460317460315	451.5074002794262	1639.2910233667371	2681.0934791821055
ING	35	fr	fr	UH	14	1.1357142857142857	537.6315626600579	1554.4214821917076	2582.8681876177357
ING	35	fr	fr	UH	15	0.2899546485260771	562.1797100298356	1622.6345792571128	2649.555814887428
ING	35	fr	fr	UH	16	0.12351473922902495	664.448137028822	1750.7192433052273	2821.162210404883
ING	35	fr	fr	UH	17	0.2537641723356009	583.4235462878239	1689.2227573117627	2693.747388980777
ING	35	fr	fr	UH	18	0.24278911564625852	526.0150883729311	1452.9964427154623	2601.196593437519
ING	35	fr	fr	UH	19	0.6048526077097506	559.6806805160695	1447.6149552393877	2651.461008254425
ING	35	fr	fr	UH	20	0.2521315192743764	652.0341492600461	1426.63285470704	2744.2972775338385
ING	35	fr	fr	UH	21	0.3453741496598639	538.1787934100428	1561.2590638203767	2527.6472068177086
ING	35	fr	fr	UH	22	0.18607709750566895	564.8964126918747	1569.3454783499637	2534.3498217827037
ING	35	fr	fr	UH	23	0.35006802721088437	645.2575018198021	1657.4778242590057	2402.0556880912154
ING	35	fr	fr	UH	24	0.13829931972789114	649.828745307948	1752.547337943327	2650.27508252729
ING	35	fr	fr	UH	25	0.23832199546485258	587.8354379894563	1603.313542973141	2626.811482664144
ING	35	fr	fr	UH	26	0.13056689342403627	640.3626055429304	1546.4150087095852	2657.876497262881
ING	35	fr	fr	UH	27	0.14984126984126983	616.9080736055353	1806.5634884302078	2607.712037729496
ING	35	fr	fr	UH	28	0.3722902494331066	629.3556104926819	1504.052961421897	2660.144021958322
ING	35	fr	fr	UH	29	0.20052154195011337	501.7783270630775	1429.8165082535447	2673.5512453097335
ING	35	fr	fr	UH	30	0.6040136054421769	525.3836055407281	1565.0955949527547	2397.0646095657726
ING	35	fr	fr	UH	31	0.2536961451247165	327.45258637524427	1538.429319374483	2732.103950729591
ING	35	fr	fr	UH	32	0.18226757369614513	699.3889686443755	1479.9643875307884	2465.9133687223366
ING	35	fr	fr	UH	33	0	0	0	0
ING	35	fr	fr	UH	34	0.4006122448979592	526.9729490636416	1480.9718654038984	2653.0371345030044
ING	35	fr	fr	UH	35	0.09088435374149659	501.91794529947407	1567.345665516564	2415.1570122972557
ING	35	fr	fr	UH	36	0.20505668934240365	593.9963282932663	1706.9427085588586	2667.520623211727
ING	35	fr	fr	UH	37	0.27138321995464854	623.1237393775873	1493.0247068092192	2635.1136117653905
ING	35	fr	fr	UH	38	0.5176643990929706	547.8572168237862	1576.3226091325052	2532.4504506152916
ING	35	fr	fr	UH	39	0.21950113378684807	580.6950680586897	1603.7316536102762	2565.4642196490067
ING	35	fr	fr	UH	40	0.2306349206349206	603.9795417729763	1545.7217674787623	2938.6216766855173
ING	35	fr	fr	UH	41	0.24659863945578228	590.256141035683	1500.5188531704773	2739.5365492108667
ING	35	fr	fr	UH	42	0.28088435374149656	452.5593881337884	1626.30303054031	2717.742692148389
ING	35	fr	fr	UH	43	0.26140589569161	649.5515441795042	1587.4739833449762	2713.774487484916
ING	35	fr	fr	UH	44	0.2712244897959184	611.4053243468281	1557.80263270338	2700.0915295719306
ING	35	fr	fr	UH	45	0.15489795918367347	626.3478736508495	1520.5554891994489	2623.5801865224953
ING	35	fr	fr	UH	46	0.5669614512471656	536.6464135108463	1511.6233117009338	2637.6230613163457
ING	35	fr	fr	UH	47	0.27920634920634924	598.7861547249137	1446.5777919684854	2555.7002215472676
ING	35	fr	fr	UH	48	0.2685487528344671	548.4526553321223	1602.4104986996329	2619.172193917702
ING	35	fr	fr	UH	49	0.927392290249433	650.4400500033162	1587.3558430578448	2600.472433955611
ING	35	fr	fr	UH	50	0.22571428571428573	553.6888261114387	1535.4294040082827	2691.8781877804017
ING	35	fr	fr	UH	51	0.1409297052154195	587.8418940917277	1692.350000244263	2727.71982546418
ING	35	fr	fr	UH	52	0.2714512471655329	592.594220676107	1519.6742378219462	2605.3616557029686
ING	35	fr	fr	UH	53	0.9042857142857142	602.0215748578458	1592.7944699576458	2628.013015152983
ING	35	fr	fr	UH	54	0.4525850340136055	537.9960440684285	1562.9462138006588	2620.5402407134466
ING	35	fr	fr	UH	55	0.38541950113378687	678.7448630175737	1416.585136544903	2610.0136979187164
ING	35	fr	fr	UH	56	0.17505668934240362	547.392469544353	1514.001050850222	2592.044066656639
ING	35	fr	fr	UH	57	0.5035600907029478	526.830620363349	1488.1365430280987	2665.224727310419
ING	35	fr	fr	UH	58	0.26222222222222225	665.5013930042386	1384.4664524713412	2648.887225001153
ING	35	fr	fr	UH	59	0.3771655328798186	511.7950603967941	1547.397946868325	2587.4291100990326
ING	35	fr	fr	UH	60	0.42247165532879816	599.8494867044383	1674.0524036262273	2498.160233571427
ING	35	fr	fr	UH	61	0	0	0	0
ING	35	fr	fr	UH	62	0.19578231292517004	617.6553129537637	1472.025941840494	2864.4634056098207
ING	35	fr	fr	UH	63	0.41417233560090705	791.926735722526	1411.5399231257882	3029.8717824000073
ING	35	fr	fr	UH	64	1.0653061224489795	738.0110232025152	1529.0069804500413	2663.708088013549
ING	35	fr	fr	UH	65	0.44412698412698415	639.6565434220888	1436.229759624297	2722.51398870753
ING	35	fr	fr	UH	66	0.237437641723356	647.6022880693097	1626.4568321592292	2734.44075637003
ING	35	fr	fr	UH	67	0.18018140589569162	658.7489382635982	1460.0837889708102	2765.373619481968
ING	35	fr	fr	UM	0	0	0	0	0
ING	35	fr	fr	UM	1	0.030204081632653063	584.2717929582371	1524.6653678653174	2474.6943145288133
ING	35	fr	fr	UM	2	0.3440362811791383	678.9756844100202	1630.4327444808976	2650.020354163392
ING	35	fr	fr	UM	3	0.28367346938775506	598.7190437306025	1522.3239526587586	2367.1673847944203
ING	35	fr	fr	UM	4	0.5293424036281179	599.6072831499705	1674.110954925324	2645.5683288929445
ING	35	fr	fr	UM	5	0.5903628117913833	677.5570628714435	1524.8993079928418	2456.263052155424
ING	35	fr	fr	UM	6	0.44199546485260777	640.458170009515	1590.2151973745838	2382.5317377471524
ING	35	fr	fr	UM	7	0.27714285714285714	589.2771505298332	1601.2124239829539	2734.11573663948
ING	35	fr	fr	UM	8	0.616530612244898	586.191259552753	1580.178707160985	2695.9026195975725
ING	35	fr	fr	UM	9	0.30963718820861674	587.630356955574	1549.308533822634	2571.1163242703833
ING	35	fr	fr	UM	10	0.21276643990929703	839.8581846427378	1551.0569547979749	2587.7084147091055
ING	35	fr	fr	UM	11	0.2572108843537415	646.8598798336723	1585.0225241263956	2619.899663644252
ING	35	fr	fr	UM	12	0.34929705215419504	614.4277524932902	1472.4652822744165	2652.8351566699903
ING	35	fr	fr	UM	13	0.2312471655328798	625.5729231397166	1608.2016830058915	2570.7064963316766
ING	35	fr	fr	UM	14	0.3119727891156463	588.7836803950069	1595.1797762204048	2557.571999457577
JEN	20	dt	fr	UH	0	0	0	0	0
JEN	20	dt	fr	UH	0	0	0	0	0
JEN	20	dt	fr	UH	0	0	0	0	0
JEN	20	dt	fr	UH	0	0	0	0	0
JEN	20	dt	fr	UH	0	0	0	0	0
JEN	20	dt	fr	UH	0	0	0	0	0
JEN	20	dt	fr	UH	0	0	0	0	0
JEN	20	dt	fr	UH	0	0	0	0	0
JEN	20	dt	fr	UH	0	0	0	0	0
JEN	20	dt	fr	UH	0	0	0	0	0
JEN	20	dt	fr	UH	1	0.5680498866213152	593.0536123522636	1511.6294611576755	2713.5138067863872
JEN	20	dt	fr	UH	2	0.31174603174603177	573.693908882085	1447.5007262981999	2540.412376342106
JEN	20	dt	fr	UH	3	0.28210884353741494	595.4453243791143	1595.5316815542787	2791.77691782693
JEN	20	dt	fr	UH	4	0.23458049886621316	721.7943415426847	1566.3825776244284	2853.279678383834
JEN	20	dt	fr	UH	5	0.3068707482993197	644.1748078547126	1413.125117116963	2731.587680832947
JEN	20	dt	fr	UH	6	0.18024943310657596	742.4226849433999	1631.9408136192114	2674.0210819823415
JEN	20	dt	fr	UH	7	0.23083900226757367	700.543566111232	1548.8797526731958	2528.632673952183
JEN	20	dt	fr	UH	8	0.16517006802721088	521.9743819740673	1561.6851765304273	2451.3864518560194
JEN	20	dt	fr	UH	9	0.3661904761904762	715.8816461625831	1586.9977644803153	2817.240414940112
JEN	20	dt	fr	UH	10	0.2252380952380952	631.0336094827903	1652.7277794019933	2657.110704698349
JEN	20	dt	fr	UH	100	0.6568480725623583	716.842199512892	1496.2194714495736	2687.659000458087
JEN	20	dt	fr	UH	101	0.1897959183673469	472.48768132990733	1567.4988898830075	2461.8339490398603
JEN	20	dt	fr	UH	102	0.2893650793650794	537.6747566893704	1610.2174329446116	2562.167467072708
JEN	20	dt	fr	UH	103	0.26591836734693874	491.5676134766561	1653.8422200954349	2682.7710886058367
JEN	20	dt	fr	UH	104	0.17396825396825397	568.6167309047237	1561.943754199119	2633.1881754543606
JEN	20	dt	fr	UH	105	0.4649433106575964	569.0078034168213	1451.611225602619	2589.321376347234
JEN	20	dt	fr	UH	106	0.27931972789115644	682.80244861879	1849.7454043792247	2631.6869501299284
JEN	20	dt	fr	UH	107	0.30181405895691604	473.0721033836176	1793.8374899327573	2569.8116241977477
JEN	20	dt	fr	UH	108	0.3168253968253968	674.936484699211	1734.6671334672174	2653.0311556705788
JEN	20	dt	fr	UH	109	0.784467120181406	650.0250414563404	1512.7794813286093	2634.976192965551
JEN	20	dt	fr	UH	11	0.16746031746031745	694.6426412030698	1700.0141851892386	2681.6371799900926
JEN	20	dt	fr	UH	110	0.3626757369614513	630.6610617274954	1589.571666089386	2719.6484691179194
JEN	20	dt	fr	UH	111	0.2640589569160998	547.3374960263234	1525.7756523689254	2587.5960936499655
JEN	20	dt	fr	UH	112	0.48888888888888893	637.754225224954	1635.984457330619	2890.569192039138
JEN	20	dt	fr	UH	113	0.4729478458049887	619.0043534839441	1491.1367313886478	2692.77969878701
JEN	20	dt	fr	UH	114	0.226734693877551	449.2494477492607	1652.8972591680697	2638.8283257644807
JEN	20	dt	fr	UH	12	0.10884353741496597	722.5954803527163	1720.3892989062301	2733.5849094338955
JEN	20	dt	fr	UH	13	0.27208616780045347	603.3644524807752	1354.3446433249483	2505.600010561159
JEN	20	dt	fr	UH	14	0.17718820861678006	654.3620928141082	1676.6796701982753	2655.1606655512583
JEN	20	dt	fr	UH	15	0.2266439909297052	616.5232471026184	1731.9580133993825	2660.748951094927
JEN	20	dt	fr	UH	16	0.7525170068027212	698.3900890089749	1549.643035075758	2760.183053662202
JEN	20	dt	fr	UH	17	0.2514512471655329	763.2431605488118	1621.950263832803	2682.4166399523638
JEN	20	dt	fr	UH	18	0.2527210884353741	736.7909567596166	1636.029465295036	2695.6266815118734
JEN	20	dt	fr	UH	19	0.1760997732426304	601.709213268325	1696.6402380808765	2789.702348110403
JEN	20	dt	fr	UH	20	0.16224489795918365	736.2395611995867	1736.5279525041667	2748.954807411721
JEN	20	dt	fr	UH	21	0.24081632653061222	510.099270998821	1739.0936295318052	2825.929569598172
JEN	20	dt	fr	UH	22	0.10158730158730159	472.7284954882397	1784.5307293113756	3058.0971520709713
JEN	20	dt	fr	UH	23	0.3636281179138322	592.0307832299818	1831.392947219384	2877.110158982077
JEN	20	dt	fr	UH	24	0.33723356009070293	493.4684942182031	1749.613388604173	2603.3231536557905
JEN	20	dt	fr	UH	25	0.21058956916099772	637.0189864013	1746.4788558357134	2687.345765195968
JEN	20	dt	fr	UH	26	0.27773242630385486	606.1053033755849	1558.6362563657062	2754.541043860511
JEN	20	dt	fr	UH	27	0.2368253968253968	430.1365902616468	1460.2157124397206	2525.994568275595
JEN	20	dt	fr	UH	28	0.16092970521541952	568.1901485992522	1735.57154266962	2694.538082966396
JEN	20	dt	fr	UH	29	0.19263038548752834	557.2643279625099	1467.81854505726	2652.1516417872904
JEN	20	dt	fr	UH	30	0.30551020408163265	467.4979206079559	1460.4489126593862	2609.9751520831774
JEN	20	dt	fr	UH	31	0.12582766439909296	579.0146824939834	1549.85066449843	2783.0064291030612
JEN	20	dt	fr	UH	32	0.24287981859410432	507.87762189929794	1573.148768580048	2732.2233198166073
JEN	20	dt	fr	UH	33	0.1329705215419501	491.4917768635879	1494.6801426784396	2544.6085693769037
JEN	20	dt	fr	UH	34	0.40530612244897957	637.6584392990508	1379.9653945672494	2650.098894419508
JEN	20	dt	fr	UH	35	0.3398639455782313	529.576322889316	1532.8776957910436	2568.60024473738
JEN	20	dt	fr	UH	36	0.31079365079365073	571.3712692347658	1748.0649298082049	2854.816234376129
JEN	20	dt	fr	UH	37	0.9706349206349206	537.8460431819317	1478.1372570281442	2756.3090556147226
JEN	20	dt	fr	UH	38	0.13433106575963719	551.1787402387556	1233.728517650772	2828.7305535328355
JEN	20	dt	fr	UH	39	0.2001360544217687	468.8793455759536	1645.094893473761	2814.413418187057
JEN	20	dt	fr	UH	40	0.2631519274376417	606.2955618500455	1677.3391879994206	2690.0163405094318
JEN	20	dt	fr	UH	41	0.2746031746031746	628.2865442210848	1430.506291943189	2672.4455742087794
JEN	20	dt	fr	UH	42	0.3382766439909297	618.1439340892781	1544.7967039759442	2679.8910092383107
JEN	20	dt	fr	UH	43	0.31732426303854877	611.6577156011443	1681.1847834040707	2818.4579947898455
JEN	20	dt	fr	UH	44	0.10678004535147392	411.9169619757555	1486.5050956738874	2447.688411585853
JEN	20	dt	fr	UH	45	0.2340362811791383	675.0526298636664	1452.858422248336	2685.5133786772444
JEN	20	dt	fr	UH	46	0.22383219954648523	479.35073637318516	1684.843302392679	2774.2708321120863
JEN	20	dt	fr	UH	47	0.3561224489795918	682.2248198200972	1546.4390527536896	2699.7013330125887
JEN	20	dt	fr	UH	48	0.40537414965986396	406.1315896271765	1561.3297991195911	2545.91504555384
JEN	20	dt	fr	UH	49	0.42619047619047623	688.1092375656613	1528.144185797758	2713.4604885232975
JEN	20	dt	fr	UH	50	0.27566893424036276	641.4829827065245	1481.0307357264276	2711.849918073911
JEN	20	dt	fr	UH	51	0.5220181405895692	667.9481601529559	1418.7493731915129	2697.110008000285
JEN	20	dt	fr	UH	52	0.16378684807256236	587.5345346369465	1591.2896802540088	2623.619189734158
JEN	20	dt	fr	UH	53	0.3539909297052154	687.262148998627	1615.0490464777213	2818.962715410535
JEN	20	dt	fr	UH	54	0.13034013605442177	630.6978646519011	1237.7599631281962	2726.861658728592
JEN	20	dt	fr	UH	55	0.20464852607709752	531.6578422247624	1490.0174291924654	2633.46466806874
JEN	20	dt	fr	UH	56	0.23848072562358277	621.9207416821172	1616.9671572328486	2568.77768926918
JEN	20	dt	fr	UH	57	0.2580725623582767	544.4288623838295	1565.9162093378045	2917.4149158948157
JEN	20	dt	fr	UH	58	0.28482993197278916	426.5761731693721	1549.7759924042102	2576.166825622492
JEN	20	dt	fr	UH	59	0.31170068027210884	596.814735909309	1580.8588160877391	2673.874598456634
JEN	20	dt	fr	UH	60	0.4746031746031746	563.7966246781866	1514.5192494036946	2673.5059461694113
JEN	20	dt	fr	UH	61	0.3732879818594105	564.1702871159055	1498.692659485369	2706.077349458863
JEN	20	dt	fr	UH	62	0.6080952380952381	438.7973723683595	1559.2341968637463	2499.826030908072
JEN	20	dt	fr	UH	63	0.16621315192743766	460.30290207927607	1447.7957866312117	2444.7360092813233
JEN	20	dt	fr	UH	64	0.2300907029478458	578.3300621317724	1517.9746992783375	2557.0353731467007
JEN	20	dt	fr	UH	65	0.47122448979591836	539.5209532126718	1601.2120688347952	2508.4980181332444
JEN	20	dt	fr	UH	66	0.15002267573696146	573.9151413328955	1645.0808645879995	2685.0277262597424
JEN	20	dt	fr	UH	67	0.2979138321995465	762.6711098069683	1607.5836914099054	2833.417452359499
JEN	20	dt	fr	UH	68	0.2835827664399093	626.712402565787	1750.0001966862787	2833.4022057723428
JEN	20	dt	fr	UH	69	0.2873015873015873	603.0504278966099	1708.3301898176896	2649.6721589471695
JEN	20	dt	fr	UH	70	0.17587301587301588	626.2433668780895	1466.1556871229088	2575.973779959305
JEN	20	dt	fr	UH	71	0.2310657596371882	433.85017113532086	1405.7289399374583	2653.976198671466
JEN	20	dt	fr	UH	72	0.2844444444444444	594.7457901186693	1525.718148762248	2625.145819029419
JEN	20	dt	fr	UH	73	0.17517006802721088	655.944806253961	1603.6119269492297	2645.004834989348
JEN	20	dt	fr	UH	74	0.22068027210884353	598.5425752995457	1257.8920670409134	2542.3696254643123
JEN	20	dt	fr	UH	75	0.2621088435374149	454.22945139948916	1419.105995879337	2578.4673923294595
JEN	20	dt	fr	UH	76	0.12802721088435373	524.429187091069	1797.7783297847047	2698.9603759566835
JEN	20	dt	fr	UH	77	0.1671201814058957	496.6147423357919	1405.0008583571062	2590.140456696352
JEN	20	dt	fr	UH	78	0.4497505668934241	619.558857226006	1373.2693292122663	2626.9523880430256
JEN	20	dt	fr	UH	79	0.23485260770975055	480.8536928620235	1310.117131223832	2661.6938017940915
JEN	20	dt	fr	UH	80	0.3134240362811791	628.6762708549484	1549.5623932319897	2640.87417404256
JEN	20	dt	fr	UH	81	0	0	0	0
JEN	20	dt	fr	UH	82	0.877233560090703	598.4010609817354	1454.0715859377833	2344.631086976305
JEN	20	dt	fr	UH	83	0.28804988662131514	607.7250887365935	1578.7248489842523	2647.3344577784683
JEN	20	dt	fr	UH	84	0.4339229024943311	423.183862635133	1566.2007385658496	2578.056498715393
JEN	20	dt	fr	UH	85	0.13741496598639455	577.1559032813032	1712.8699291775094	2759.1098346829144
JEN	20	dt	fr	UH	86	0.12392290249433105	640.3114002984855	1775.4886505594664	2765.4720177252266
JEN	20	dt	fr	UH	87	0.04596371882086167	548.2678433807981	1505.459610007613	2633.828078110517
JEN	20	dt	fr	UH	88	0.7473696145124716	749.6404817442774	1416.5081015494993	2797.810117349791
JEN	20	dt	fr	UH	89	0.17573696145124715	496.95307304185576	1522.5850463212182	2538.4202167928734
JEN	20	dt	fr	UH	90	0.2213378684807256	737.8933406317898	1486.2491389147565	2818.04800100229
JEN	20	dt	fr	UH	91	0.34594104308390017	456.73458202907545	1534.5166224342165	2436.8226168216297
JEN	20	dt	fr	UH	92	0.22702947845804985	453.91871390069707	1594.215682639001	2478.068644951705
JEN	20	dt	fr	UH	93	0.5348299319727892	542.1858492674986	1774.4950760273896	2681.4762868109315
JEN	20	dt	fr	UH	94	0.18623582766439908	618.7999700631876	1635.880280103397	2424.7530934765314
JEN	20	dt	fr	UH	95	0.38766439909297057	561.454034761308	1291.9319358176692	2602.316367359227
JEN	20	dt	fr	UH	96	0.4705215419501134	457.76184669097063	1329.1188469586582	2371.9827015119313
JEN	20	dt	fr	UH	97	0.39004535147392294	516.8998498627755	1682.3422085481145	2649.776834693138
JEN	20	dt	fr	UH	98	0.29421768707483	627.5884806017847	1363.8805277973693	2580.8490094496765
JEN	20	dt	fr	UH	99	0.34727891156462587	607.456998149477	1585.0561548231547	2754.6708995603567
JEN	20	dt	fr	UM	0	0	0	0	0
JEN	20	dt	fr	UM	0	0	0	0	0
JEN	20	dt	fr	UM	0	0	0	0	0
JEN	20	dt	fr	UM	0	0	0	0	0
JEN	20	dt	fr	UM	0	0	0	0	0
JEN	20	dt	fr	UM	0	0	0	0	0
JEN	20	dt	fr	UM	0	0	0	0	0
JEN	20	dt	fr	UM	0	0	0	0	0
JEN	20	dt	fr	UM	0	0	0	0	0
JEN	20	dt	fr	UM	0	0	0	0	0
JEN	20	dt	fr	UM	0	0	0	0	0
JEN	20	dt	fr	UM	1	0.34002267573696143	645.721339583959	1551.3429708474705	2804.616264140777
JEN	20	dt	fr	UM	2	0.2220861678004535	636.8966849934529	1520.803101599939	2850.8243117574607
JEN	20	dt	fr	UM	3	0.22979591836734695	692.0853769494541	1520.2402486623773	2815.418310461765
JEN	20	dt	fr	UM	4	0.28215419501133787	726.354588814492	1606.2549720547474	2883.3379773751053
JEN	20	dt	fr	UM	5	0.28786848072562354	637.4368527282227	1640.8655864240884	2529.1535881659247
JEN	20	dt	fr	UM	6	0.18217687074829933	696.9423635832654	1526.45347966508	2780.35048065941
JEN	20	dt	fr	UM	7	0.21922902494331067	689.3852168087867	1496.4525453589872	2848.7245042986992
JEN	20	dt	fr	UM	8	0.24684807256235827	665.49108547994	1541.3221537363981	2746.875436570336
JEN	20	dt	fr	UM	9	0.30916099773242633	755.5691674722711	1518.5681394146936	2799.688425625026
JEN	20	dt	fr	UM	10	0.2209750566893424	739.6058967548082	1675.170126820235	2848.5904372815116
JEN	20	dt	fr	UM	11	0.16369614512471656	711.8333907197509	1664.8605549447348	2684.7329368530777
JEN	20	dt	fr	UM	12	0.19054421768707483	683.0845771950736	1672.3467243019102	2814.4993447963907
JEN	20	dt	fr	UM	13	0.3388208616780045	677.6788868139646	1513.7138650261302	2581.2976276235545
JEN	20	dt	fr	UM	14	0.5260317460317461	779.3512275606627	1707.622871372282	2957.131217571693
JEN	20	dt	fr	UM	15	0.15861678004535149	708.271083911433	1617.5488821734968	2621.8040475253165
JEN	20	dt	fr	UM	16	0.25487528344671206	694.9474951347978	1422.555775766895	2563.587380067855
JEN	20	dt	fr	UM	17	0.2551700680272109	772.8073287817355	1503.8096196284523	2778.431326203253
JEN	20	dt	fr	UM	18	0.1714285714285714	741.9471050274808	1666.0044811576765	3126.077959722848
JEN	20	dt	fr	UM	19	0.16981859410430836	604.8294453005836	1441.1238777540748	2475.652449333165
JEN	20	dt	fr	UM	20	0.306031746031746	605.6408185308696	1678.2017841813527	2468.543780957568
JEN	20	dt	fr	UM	21	0.21215419501133784	708.4017338621708	1477.4551158138763	2862.618267875394
JEN	20	dt	fr	UM	22	0.22351473922902496	726.1591305900457	1418.6400256020293	2645.9314570402357
JEN	20	dt	fr	UM	23	0.43959183673469393	637.7348322479596	1555.1079095320206	2651.560772075547
JEN	20	dt	fr	UM	24	0.23231292517006805	678.182761287695	1521.0894663806887	2689.2365420389488
JEN	20	dt	fr	UM	25	0.41993197278911565	614.1671427208873	1351.4696199638483	2756.9802783898494
JEN	20	dt	fr	UM	26	0.21099773242630385	657.8014620734796	1609.8790006879608	2823.3745966243073
JEN	20	dt	fr	UM	27	0.1364625850340136	718.8572288238445	1417.064672580365	2571.7979938963244
JEN	20	dt	fr	UM	28	0.26140589569161	661.4712628454047	1628.4351761005353	2605.3900122967325
JEN	20	dt	fr	UM	29	0.22031746031746033	574.9989920010862	1446.0265262817356	2499.7575817653747
JEN	20	dt	fr	UM	30	0.269750566893424	768.458376670319	1735.5027372511304	2916.225269012878
JEN	20	dt	fr	UM	31	0.11131519274376417	535.8380519252864	1378.418188366963	2570.2956985426617
JEN	20	dt	fr	UM	32	0.14068027210884354	565.7455380187016	1565.594903983705	2711.824172880273
JEN	20	dt	fr	UM	33	0.1978004535147392	647.9319914925262	1632.6165521721002	2692.4147727545715
JEN	20	dt	fr	UM	34	0.2993424036281179	677.7999238793042	1642.0862125749386	2786.5312267035524
JEN	20	dt	fr	UM	35	0.2727891156462585	589.2038006126562	1312.960650699658	2732.788055693368
JEN	20	dt	fr	UM	36	0.29870748299319727	559.3760702688672	1443.7707530903142	2638.879559795097
JEN	20	dt	fr	UM	37	0.20523809523809525	735.7722032969594	1521.3190576894813	2958.4706820776073
JEN	20	dt	fr	UM	38	0.2717006802721088	555.4985651076693	1439.042173936484	2563.130181711975
JEN	20	dt	fr	UM	39	0.32605442176870747	567.2570172946994	1685.3233743489377	2685.418008585507
JEN	20	dt	fr	UM	40	0.21392290249433107	529.4150423283104	1421.201952402154	2532.8909130278557
JEN	20	dt	fr	UM	42	0.16158730158730158	536.839760999356	1563.5806980652806	2594.842506075068
JEN	20	dt	fr	UM	43	0.16909297052154196	524.389903262763	1182.6428057187968	2592.182417814558
JEN	20	dt	fr	UM	44	0.3029931972789116	624.7276492516222	1528.705741249375	2609.2863467430434
JEN	20	dt	fr	UM	45	0.1975283446712018	702.2743019617989	1352.507069746017	2598.532769643088
JEN	20	dt	fr	UM	46	0.21396825396825395	612.5992204669863	1526.3353670790837	2762.796320119443
JEN	20	dt	fr	UM	47	0.28113378684807255	542.1903438900382	1436.2616995817812	2612.746146035831
JEN	20	dt	fr	UM	48	0.18326530612244898	530.0715032876317	1565.7148347072293	2600.1262948652425
JEN	20	dt	fr	UM	49	0.5558956916099773	576.5803003887197	1457.5471620943367	2612.727260122681
JEN	20	dt	fr	UM	50	0.192312925170068	449.2019430381487	1375.348040201432	2649.9436955698316
JEN	20	dt	fr	UM	51	0.3270521541950113	716.4428430144392	1726.3207110176693	2814.203730332837
JEN	20	dt	fr	UM	52	0.12337868480725622	581.4633008107294	1560.1896680526324	2749.9584650170045
JEN	20	dt	fr	UM	53	0.26294784580498864	525.8549883334265	1548.0182220704016	2607.247181553944
JEN	20	dt	fr	UM	54	0.2897052154195011	626.5050528892775	1624.9103362193923	2711.362358456272
JEN	20	dt	fr	UM	55	0.2085034013605442	721.0571974541527	1665.4701043137406	2787.581013092357
JEN	20	dt	fr	UM	56	0.2231519274376417	571.4777623817272	1624.4609747415411	2712.5607121869425
JEN	20	dt	fr	UM	57	0.27773242630385486	598.7590592510622	1528.0335037519408	2661.1640350119656
JEN	20	dt	fr	UM	58	0.20970521541950113	604.2438745841414	1486.416471391845	2650.494006929666
JEN	20	dt	fr	UM	59	0.18877551020408165	705.4279613751428	1439.6678850861672	2672.63878166029
JEN	20	dt	fr	UM	60	0.16666666666666666	640.999089649288	1564.680288742442	2765.6766363329684
JEN	20	dt	fr	UM	61	0.17224489795918366	742.3678536183155	1627.128775561298	2655.332765286413
JEN	20	dt	fr	UM	62	0.20428571428571426	636.6762603312102	1605.0258154069077	2904.0497699350567
JEN	20	dt	fr	UM	63	0.2140816326530612	687.839085378029	1524.0195943169547	2937.923251965351
JEN	20	dt	fr	UM	64	0.1954421768707483	681.5728030009589	1531.278460012046	2634.792548560486
JEN	20	dt	fr	UM	65	0.17777777777777778	557.7195304157984	1493.548745724539	2596.2367450332476
JEN	20	dt	fr	UM	66	0.20428571428571426	603.8348254556929	1529.8975217450957	2633.628758751198
JEN	20	dt	fr	UM	67	0.15653061224489798	581.425170602689	1628.74644228826	2651.9085258873965
JEN	20	dt	fr	UM	68	0.13873015873015873	541.2336713383979	1718.508455195013	2709.250303606147
JEN	20	dt	fr	UM	69	0.19009070294784577	592.1958276729067	1668.7885639829767	2570.778274239522
JEN	20	dt	fr	UM	70	0.11140589569160997	699.6283314909574	1593.0560812381034	2678.1274767619752
JEN	20	dt	fr	UM	71	0.19412698412698412	669.9348754418767	1689.3314776098046	2787.9948035574903
JEN	20	dt	fr	UM	72	0.3534920634920635	618.5508139659947	1338.6328803040153	2588.6111446112905
JEN	20	dt	fr	UM	73	0.20090702947845804	582.6626067824416	1421.4126516424758	2489.4610672961635
JEN	20	dt	fr	UM	74	0	0	0	0
JEN	20	dt	fr	UM	75	0.2158503401360544	500.45989269915003	1559.60158062393	2595.8609734113707
JEN	20	dt	fr	UM	76	0.2811111111111111	626.864340835188	1340.0528369365052	2614.8179294916445
JEN	20	dt	fr	UM	77	0.14482993197278912	558.9153984901595	1521.5924140865236	2732.9676300049045
JEN	20	dt	fr	UM	78	0.49396825396825395	509.58505889932246	1337.0289025326333	2732.6877798097385
JEN	20	dt	fr	UM	79	0.197891156462585	677.8886161928755	1601.1024322627206	2819.8360259630012
JEN	20	dt	fr	UM	80	0.14208616780045352	623.1598189312341	1162.1399387086592	2663.6619875684232
JEN	20	dt	fr	UM	81	0.2572108843537415	573.3710332502126	1705.6754578315167	2761.4754529663105
JEN	20	dt	fr	UM	82	0	0	0	0
JEN	20	dt	fr	UM	821	0.15553287981859412	615.2610185349582	1375.6059541564377	2688.4933899584184
LUH	20	dt	fr	UH	0	0	0	0	0
LUH	20	dt	fr	UH	0	0	0	0	0
LUH	20	dt	fr	UH	0	0	0	0	0
LUH	20	dt	fr	UH	0	0	0	0	0
LUH	20	dt	fr	UH	0	0	0	0	0
LUH	20	dt	fr	UH	0	0	0	0	0
LUH	20	dt	fr	UH	1	0.22437641723356008	630.737660797055	1785.028495546782	2666.5096391321667
LUH	20	dt	fr	UH	2	0.33079365079365075	612.9758054963592	1626.904445688805	2703.3756015709596
LUH	20	dt	fr	UH	3	0.7632879818594105	650.9193885658925	1471.363623498898	2716.231334534449
LUH	20	dt	fr	UH	4	0.407233560090703	624.586728905487	1669.3088695893025	2662.291313608932
LUH	20	dt	fr	UH	5	0.3284580498866213	570.2991244238148	1725.9913683122484	2691.0690339449948
LUH	20	dt	fr	UH	6	1.2373696145124715	487.85921942589823	1513.488856890494	2665.762660255419
LUH	20	dt	fr	UH	7	0.3280952380952381	535.4470746492352	1605.651060476583	2697.20153243622
LUH	20	dt	fr	UH	8	0.5543764172335601	571.1797375349225	1580.9938441329539	2700.501226988485
LUH	20	dt	fr	UH	9	0.31235827664399096	621.7920342128582	1560.9299377263474	2739.138146022682
LUH	20	dt	fr	UH	10	0.2706802721088435	521.8509740923582	1592.13771218359	2597.482329772039
LUH	20	dt	fr	UH	11	0.5056689342403629	603.295240522113	1554.527424336402	2780.1238604012306
LUH	20	dt	fr	UH	12	0.5957823129251701	613.5327036525273	1664.0383799639135	2817.16090364624
LUH	20	dt	fr	UH	13	0.14215419501133786	552.9679472105323	1753.5373326881222	2949.3942353397624
LUH	20	dt	fr	UH	14	0.1899546485260771	490.8428413765712	1805.5224778805257	2764.104732181281
LUH	20	dt	fr	UH	15	0.19439909297052152	585.6844211718478	1454.1764647276384	2625.3570264837667
LUH	20	dt	fr	UH	16	0.25791383219954644	548.2804620529494	1603.8633372155466	2639.5768296699302
LUH	20	dt	fr	UH	17	0.40975056689342404	590.5135312564996	1391.153627965885	2543.239446397866
LUH	20	dt	fr	UH	18	0.3274149659863945	497.9386456294055	1685.7327670664554	2631.525981722908
LUH	20	dt	fr	UH	19	0.3756916099773242	573.5852315371013	1603.9446648463709	2592.128543882393
LUH	20	dt	fr	UH	20	0.29800453514739234	558.2117864015943	1613.761007010807	2791.500372495114
LUH	20	dt	fr	UH	21	0.4382312925170069	535.4361425751857	1568.3685462210376	2766.2387534459904
LUH	20	dt	fr	UH	22	0.24668934240362814	604.1083173668944	1870.6900707498437	2612.6322556222235
LUH	20	dt	fr	UH	23	0.26712018140589566	434.45408573310004	1710.2109571371934	2527.252079946252
LUH	20	dt	fr	UH	24	0.20426303854875286	553.4358476779184	1578.2917941275591	2799.8796066720192
LUH	20	dt	fr	UH	25	0.6833106575963719	499.8893980380627	1634.908098205224	2854.4727384134985
LUH	20	dt	fr	UH	26	0.33181405895691607	517.6951623559821	1492.3296923243554	2703.228251031868
LUH	20	dt	fr	UH	27	0.05673469387755101	665.3485282613033	1447.9592935754556	2705.2937932394166
LUH	20	dt	fr	UH	28	0.43181405895691616	623.8778193638565	1504.5146423829055	2592.829631917062
LUH	20	dt	fr	UH	29	0.3165759637188209	597.8457314841037	1581.1667212209668	2645.297912698815
LUH	20	dt	fr	UH	30	0.28442176870748304	613.1749955567275	1617.206715702577	2806.425449434132
LUH	20	dt	fr	UH	31	0.32927437641723356	461.0680745380755	1637.4510042421894	2696.7300450314888
LUH	20	dt	fr	UH	32	0.8887528344671202	554.2953856666745	1465.5912141852632	2751.9780450507
LUH	20	dt	fr	UH	33	0.5057596371882086	587.8562902502019	1518.8394721387324	2667.632876381917
LUH	20	dt	fr	UH	34	0.30344671201814055	557.6840292169707	1606.6787388877597	2550.7020995104303
LUH	20	dt	fr	UH	35	0.6225396825396826	520.9986727230073	1518.4643387629562	2473.2871080882273
LUH	20	dt	fr	UH	36	0.33176870748299314	541.6634103681267	1421.8461685033699	2710.4726319639426
LUH	20	dt	fr	UH	37	0.4078231292517007	613.1771130158495	1575.128871695987	2607.4985061281177
LUH	20	dt	fr	UH	38	0.2986394557823129	484.60555507480706	1649.7002775916071	2786.4900637061914
LUH	20	dt	fr	UH	39	0.23104308390022674	560.1105971150408	1392.9578066675024	2787.052395053744
LUH	20	dt	fr	UH	40	0.2686848072562358	517.9182731740416	1619.566974899446	2653.0003978458435
LUH	20	dt	fr	UH	41	0.2556235827664399	588.5486722730478	1330.285332586405	2740.8862294034066
LUH	20	dt	fr	UH	42	1.2214058956916098	558.8124336608532	1589.128821781031	2916.825280090021
LUH	20	dt	fr	UH	43	0.07321995464852607	460.2545029445592	1678.2709457455487	2642.4982014107372
LUH	20	dt	fr	UH	44	0.34498866213151924	458.3233882359049	1598.218112947492	2588.676301966383
LUH	20	dt	fr	UH	45	0.15258503401360543	530.0957874141053	1701.9425642968095	2441.529661448191
LUH	20	dt	fr	UH	46	0.35820861678004534	610.1038559740508	1565.9769121212728	2700.0941027841795
LUH	20	dt	fr	UH	47	0.2818367346938776	446.1932673735913	1461.4683181308185	2622.48151018751
LUH	20	dt	fr	UH	48	0.19628117913832197	434.25395589791077	1564.1569796128506	2651.158333207787
LUH	20	dt	fr	UH	49	0.2568707482993198	611.2526339716981	1482.5083520893158	2744.5675563989953
LUH	20	dt	fr	UH	50	0.22560090702947846	537.4179798012217	1478.0395336647591	2533.8270872257162
LUH	20	dt	fr	UH	51	0.4171882086167801	631.2731706626492	1674.1493339743715	2754.231325258747
LUH	20	dt	fr	UH	52	0.40428571428571436	565.9991640257449	1490.1846456387398	2739.9885535407902
LUH	20	dt	fr	UH	53	0.39433106575963717	506.33153219748544	1581.4469164308935	2515.8002751930685
LUH	20	dt	fr	UH	54	0.5870294784580499	810.925297668068	1473.3298265192648	2790.6043455911567
LUH	20	dt	fr	UH	55	0.2293424036281179	554.0720636803034	1446.672142154578	2758.508720598342
LUH	20	dt	fr	UH	56	0.32662131519274373	612.6758472493565	1572.8210915884158	2597.4711288248063
LUH	20	dt	fr	UH	57	0.11485260770975056	497.08237857360996	1696.3195229840483	2636.4352127428415
LUH	20	dt	fr	UH	58	0.544421768707483	523.453152218462	1610.8541563763088	2654.335042735232
LUH	20	dt	fr	UH	59	0.1799546485260771	686.1696522454573	1658.2017143450364	2831.3007244035925
LUH	20	dt	fr	UH	60	0.4842857142857143	497.9027972132857	1526.0157777556697	2782.479699390932
LUH	20	dt	fr	UM	0	0	0	0	0
LUH	20	dt	fr	UM	0	0	0	0	0
LUH	20	dt	fr	UM	0	0	0	0	0
LUH	20	dt	fr	UM	0	0	0	0	0
LUH	20	dt	fr	UM	1	0.6691836734693878	693.3482275538887	1558.696047523239	2727.3949938022015
LUH	20	dt	fr	UM	2	0.276984126984127	626.7369020258839	1522.6614499863633	2564.271352574634
LUH	20	dt	fr	UM	3	0.20537414965986392	572.4083310938881	1373.5731012044544	2539.076146544351
LUH	20	dt	fr	UM	4	0.29913832199546486	659.7938322322093	1620.8261112090174	2685.083634993901
LUH	20	dt	fr	UM	5	0.21210884353741496	658.174737111008	1633.735081175368	2654.759533942349
LUH	20	dt	fr	UM	6	0.12092970521541949	590.231075122714	1679.7181749062786	2567.02145278005
LUH	20	dt	fr	UM	7	0.18718820861678007	747.5672248442845	1601.3744539392776	2696.294759728088
LUH	20	dt	fr	UM	8	0.19657596371882083	588.0209002176884	1600.0680462113255	2664.143611572888
LUH	20	dt	fr	UM	9	0.10351473922902493	755.4431291335707	1554.4446255464086	2702.218279201643
LUH	20	dt	fr	UM	10	0.12782312925170067	570.1240897173716	1642.1065986483186	2706.8382510598713
LUH	20	dt	fr	UM	11	0.15412698412698414	656.2006850308271	1387.581442256984	2812.0686803062595
LUH	20	dt	fr	UM	12	0.21959183673469387	703.5780771408942	1400.6627438033672	2722.0783169617944
LUH	20	dt	fr	UM	13	0.24043083900226755	685.1932970955049	1335.1690909397028	2867.9586497503283
LUH	20	dt	fr	UM	14	0.4356009070294785	538.1425394245036	1533.8246431895607	2714.2638849653904
LUH	20	dt	fr	UM	15	0.2773469387755102	615.8732269954903	1635.1529162279558	2548.7804886747927
LUH	20	dt	fr	UM	16	0.2547165532879818	674.5982604775386	1615.2968425370907	2618.9447895305566
LUH	20	dt	fr	UM	17	0.43006802721088433	764.2070995925	1643.8625096530748	2743.985695748052
LUH	20	dt	fr	UM	18	0.24426303854875284	803.002177923788	1456.5151904659476	2673.7835437914196
LUH	20	dt	fr	UM	19	0.2465532879818594	605.2679639706045	1535.91959402861	2680.691005932827
LUH	20	dt	fr	UM	20	0.1935374149659864	734.755566779832	1525.4503512839092	2516.4921226808815
LUH	20	dt	fr	UM	21	0.24750566893424034	534.6211880179616	1331.9289346707915	2510.6334412370106
LUH	20	dt	fr	UM	22	0.32460317460317456	541.4511011619268	1516.1141009505359	2732.7342187156055
LUH	20	dt	fr	UM	23	0.11875283446712018	753.8915075041434	1555.3021088984804	2700.4582661015525
LUH	20	dt	fr	UM	24	0.21605442176870746	650.8436798784351	1640.7157445013386	2719.8603789080244
LUH	20	dt	fr	UM	25	0.12362811791383219	664.9498277714525	1324.0945984141003	2789.2003282211253
LUH	20	dt	fr	UM	26	0.21562358276643992	793.167865937504	1437.0730122000684	2781.501493552409
LUH	20	dt	fr	UM	27	0.24024943310657595	619.0202198814145	1592.1342324693128	2585.3095961453178
LUH	20	dt	fr	UM	28	0.3016553287981859	667.9457658685089	1470.1108412376843	2619.5862442157973
LUH	20	dt	fr	UM	29	0.10541950113378684	796.1883751701741	1570.3320578077346	2615.569542870262
LUH	20	dt	fr	UM	30	0.2868707482993197	691.3864077932175	1639.9475512714207	2721.8821889734354
LUH	20	dt	fr	UM	31	0.36124716553287983	608.2742168587756	1596.7982574091138	2666.0986687507097
LUH	20	dt	fr	UM	32	0.22233560090702945	651.6634940079865	1515.9673416569312	2661.086872867765
LUH	20	dt	fr	UM	33	0.4252380952380953	654.1693660065994	1606.448594324899	2399.526087635441
LUH	20	dt	fr	UM	34	0.19011337868480724	521.9219054913314	1619.1200441255817	2672.88700728311
LUH	20	dt	fr	UM	35	0.22081632653061226	554.0359762120053	1504.5679094543236	2654.5535396787345
LUH	20	dt	fr	UM	36	0.21176870748299317	647.6628139890402	1645.2240834923211	2691.4743671170036
LUH	20	dt	fr	UM	37	0.1063718820861678	559.032880022547	1685.4038640148015	2667.509279053774
LUH	20	dt	fr	UM	38	0.13247165532879818	788.1921078168145	1503.8404537622077	2697.704026552048
LUH	20	dt	fr	UM	39	0.19099773242630383	646.9874291411722	1617.1242513921723	2714.076657525478
LUH	20	dt	fr	UM	40	0.06401360544217685	673.9809563780829	1579.8916198756667	2768.8634264465277
NAD	39	dt	fr	UH	0	0	0	0	0
NAD	39	dt	fr	UH	0	0	0	0	0
NAD	39	dt	fr	UH	0	0	0	0	0
NAD	39	dt	fr	UH	1	0.3673922902494331	559.6977068517638	1482.5862931218405	2721.814449538294
NAD	39	dt	fr	UH	2	0.34056689342403623	637.7765630752962	1474.6080440048354	2915.1611943082685
NAD	39	dt	fr	UH	3	0.2827437641723356	336.51398266418573	1003.0766567568385	2799.851818182298
NAD	39	dt	fr	UH	4	0.48269841269841274	653.1877704761649	1504.7055263183324	2883.756502319194
NAD	39	dt	fr	UH	5	0.31582766439909293	565.553195543026	1510.3224119641495	2903.906846953206
NAD	39	dt	fr	UH	6	0.2584126984126984	570.4544080157935	1493.1966300740964	2864.469841910131
NAD	39	dt	fr	UH	7	0.2504308390022676	575.0453996167122	1536.0840875688168	2867.804188087847
NAD	39	dt	fr	UH	8	0.16997732426303855	497.9316133372956	1667.9807505568645	2827.263252777371
NAD	39	dt	fr	UH	9	0.2746258503401361	699.7195450907994	1567.87534367702	2828.937922238239
NAD	39	dt	fr	UH	10	0.27693877551020407	747.494835750124	1507.507619734029	2752.470613463524
NAD	39	dt	fr	UH	11	0.209297052154195	688.2610444384503	1495.3593406151429	2946.9671302682364
NAD	39	dt	fr	UH	12	0.21780045351473923	500.5830954481129	1531.298829305378	2810.7880991193974
NAD	39	dt	fr	UH	13	0.3084580498866213	436.6324086549279	1160.636103943168	2817.0615868187415
NAD	39	dt	fr	UH	14	0.419795918367347	542.5681748381415	1523.814455696717	2891.721151987949
NAD	39	dt	fr	UH	15	0.5545351473922903	629.9737847272977	1686.789439281568	2884.9916530896858
NAD	39	dt	fr	UH	16	0.2660544217687075	606.6593668202436	1326.0504898222214	2851.193196382256
NAD	39	dt	fr	UH	17	0.13723356009070295	524.3952578733642	1566.6685363336194	2798.1608109193635
NAD	39	dt	fr	UH	18	0.2834240362811792	685.5761416113671	1585.41554903343	2906.6009872368945
NAD	39	dt	fr	UH	19	0.3204081632653061	523.4000564927753	1326.8769040386949	2813.5690373966436
NAD	39	dt	fr	UH	20	0.16419501133786849	466.61901484017994	1631.6692554793408	2699.759288187208
NAD	39	dt	fr	UH	21	0.21188208616780044	590.7431152104625	1264.9137234598165	2524.0692163451017
NAD	39	dt	fr	UH	22	0.35777777777777775	580.4682287591025	1369.1173683622123	2814.8928852570616
NAD	39	dt	fr	UH	23	0.6757369614512472	554.4466286015206	1282.8733660687165	2906.163538842818
NAD	39	dt	fr	UH	24	0.4089115646258503	645.6861861525317	1791.3210631621978	2907.89076117926
NAD	39	dt	fr	UH	25	0.1768934240362812	724.5400124867197	1668.7903328291738	2689.999720784816
NAD	39	dt	fr	UH	26	0.27900226757369617	602.6761231708555	1573.7399289937298	2928.5313260984612
NAD	39	dt	fr	UH	27	0.2980952380952381	520.2592198860991	1242.0439708458664	2989.2607193016615
NAD	39	dt	fr	UH	28	0.2809297052154195	481.8417610093203	1313.4984238020675	2892.030145715059
NAD	39	dt	fr	UH	29	0.5543310657596372	507.75249633796216	1127.6410754748285	2877.2124768879853
NAD	39	dt	fr	UH	30	0.24054421768707482	628.2879670788493	1357.6244308344728	2850.3578190505273
NAD	39	dt	fr	UH	31	0.4852834467120182	741.3540065083479	1461.8356814294552	2862.9091928545463
NAD	39	dt	fr	UH	32	0.33716553287981854	670.3795629498323	1150.2471301844369	2941.657214615169
NAD	39	dt	fr	UH	33	0.6356689342403629	673.9032478167087	1530.907562728561	2866.7632673396993
NAD	39	dt	fr	UH	34	0	0	0	0
NAD	39	dt	fr	UH	35	0.3254195011337868	700.7041438986954	1457.6879299798754	2834.3925632165583
NAD	39	dt	fr	UH	36	0.2742403628117914	713.0399598795207	1422.9511747369586	2850.3687736153715
NAD	39	dt	fr	UH	37	0.37961451247165534	679.8946740155136	1182.3368525085434	2879.0260402816866
NAD	39	dt	fr	UH	38	0.28385487528344666	701.8035501948502	1403.3459415710427	2851.5976626066504
NAD	39	dt	fr	UH	39	0.45795918367346944	700.914716008124	1557.340891701851	2778.259729964485
NAD	39	dt	fr	UH	40	0.36310657596371887	677.1694306888124	1432.7587334573127	2937.580598896291
NAD	39	dt	fr	UH	41	0.3356689342403628	639.7856785373642	1488.9380469995328	2718.4829739081556
NAD	39	dt	fr	UH	42	0.20297052154195008	693.9570288436123	1596.244263268004	2760.9670078552717
NAD	39	dt	fr	UH	43	0	0	0	0
NAD	39	dt	fr	UH	44	0.24922902494331065	649.644512343713	1514.1330441489745	2844.9005982760928
NAD	39	dt	fr	UH	45	0.5796598639455782	555.6954948362851	1500.6135024908847	2905.6977435159483
NAD	39	dt	fr	UH	46	0.4590022675736962	706.0572673017069	1395.3243782746858	2861.330160413275
NAD	39	dt	fr	UH	47	0.6894331065759638	609.6907588877514	1657.8527240222134	2909.061078915406
NAD	39	dt	fr	UH	48	0	0	0	0
NAD	39	dt	fr	UH	49	0	0	0	0
NAD	39	dt	fr	UH	50	0.24190476190476187	683.4299033176329	1286.935682305139	2833.9149433871703
NAD	39	dt	fr	UH	51	0.2593877551020408	736.7463992556992	1542.7562789581928	2907.673253204408
NAD	39	dt	fr	UH	52	0.2699546485260771	708.6044369896854	1306.2312761827727	2877.50661200084
NAD	39	dt	fr	UH	53	0.303219954648526	582.0135334780061	1322.3937787075824	2823.699783372091
NAD	39	dt	fr	UH	54	0.32648526077097506	647.8238813993615	1276.940466710361	2956.929307032608
NAD	39	dt	fr	UH	55	0.3317233560090703	492.574278664369	1294.6502095755984	3130.8187182975453
NAD	39	dt	fr	UH	56	0.46321995464852606	624.8051372997413	1376.5185541107821	2693.8968706898886
NAD	39	dt	fr	UH	57	0.23736961451247165	647.7888652553488	1261.032174501288	2878.5460166616526
NAD	39	dt	fr	UH	58	0	0	0	0
NAD	39	dt	fr	UH	59	0.14340136054421768	615.9748465355876	1668.6675564616567	2775.1694165646313
NAD	39	dt	fr	UH	60	0.36791383219954643	512.5607463850417	1180.9782570346129	2298.1393310096473
NAD	39	dt	fr	UH	61	0	0	0	0
NAD	39	dt	fr	UH	62	0.31492063492063493	529.1372686314935	1320.2200291980173	2760.0261345724825
NAD	39	dt	fr	UH	63	0	0	0	0
NAD	39	dt	fr	UH	64	0	0	0	0
NAD	39	dt	fr	UM	1	0.3347619047619047	611.9782873845865	1480.6330126752653	2982.3056311055543
NAD	39	dt	fr	UM	2	0.4048526077097506	739.4008908302773	1548.4834731562169	2937.785419899338
NAD	39	dt	fr	UM	3	0.09362811791383219	620.5579699247262	1436.275619976081	2926.8083378421275
NAD	39	dt	fr	UM	4	0.31090702947845805	454.8722132430973	1177.814854178764	2736.5169880072053
NAD	39	dt	fr	UM	5	0.19294784580498867	604.2858376679972	1528.0812742113585	2953.353976871869
NAD	39	dt	fr	UM	6	0.22632653061224492	373.16863063059157	1348.4494479680088	2787.9848837703157
NAD	39	dt	fr	UM	7	0.2852154195011338	672.5645808869926	1414.2496427724475	2775.1682100573303
NAD	39	dt	fr	UM	8	0.22201814058956917	726.4117780405725	1504.7882820501413	2859.8048613786077
NAD	39	dt	fr	UM	9	0	0	0	0
NAD	39	dt	fr	UM	10	0	0	0	0
NAD	39	dt	fr	UM	11	0.12140589569160998	627.0968622126323	1345.5281853490926	2710.4141410765487
NAD	39	dt	fr	UM	12	0	0	0	0
NAT	41	fr	fr	UH	0	0	0	0	0
NAT	41	fr	fr	UH	0	0	0	0	0
NAT	41	fr	fr	UH	0	0	0	0	0
NAT	41	fr	fr	UH	0	0	0	0	0
NAT	41	fr	fr	UH	0	0	0	0	0
NAT	41	fr	fr	UH	0	0	0	0	0
NAT	41	fr	fr	UH	1	0.363015873015873	621.106071013014	1824.738040571693	2950.019867297087
NAT	41	fr	fr	UH	2	0	0	0	0
NAT	41	fr	fr	UH	3	0	0	0	0
NAT	41	fr	fr	UH	4	0.324875283446712	330.9811006042271	1551.0417647862441	2818.4702229663535
NAT	41	fr	fr	UH	5	0.7704535147392291	340.2543937921668	1395.6970314180612	2589.637186057731
NAT	41	fr	fr	UH	6	0.6518367346938776	523.98751626313	1728.891885488359	2536.958041289678
NAT	41	fr	fr	UH	7	0	0	0	0
NAT	41	fr	fr	UH	8	0	0	0	0
NAT	41	fr	fr	UH	9	0.8134920634920635	366.22445306366626	1523.1167988995314	2398.175430210003
NAT	41	fr	fr	UH	10	0.3555555555555555	785.4895851038707	1667.2754877084428	2621.602910366951
NAT	41	fr	fr	UH	11	0.9033786848072564	426.11500619746647	1391.0203797312433	2461.305203681319
NAT	41	fr	fr	UH	12	0.2750340136054422	386.78389909184887	1491.2581812079268	2495.629568227305
NAT	41	fr	fr	UH	13	0.5670975056689342	778.4055396123906	1516.6592096672528	2331.6046502765344
NAT	41	fr	fr	UH	14	0.5747392290249433	578.2439890164101	1572.3061942741292	2781.01263236701
NAT	41	fr	fr	UH	15	0	0	0	0
NAT	41	fr	fr	UH	16	0.0895238095238095	475.656024957977	1711.9422700820983	2547.7811457047546
NAT	41	fr	fr	UH	17	0	0	0	0
NAT	41	fr	fr	UH	18	0.49106575963718824	754.4249077907732	1586.946994356517	2648.1540528488104
NAT	41	fr	fr	UH	19	0.5251927437641724	831.2464899438571	1820.5988888741294	2792.735254719002
NAT	41	fr	fr	UH	20	1.0733333333333333	384.4691052345642	1473.64298618707	2489.2358088718465
NAT	41	fr	fr	UH	21	0.35857142857142854	676.0477650712969	1681.338611916242	2863.283886095028
NAT	41	fr	fr	UH	22	1.8066439909297052	312.7773251403885	1570.5891100049068	2560.8402746854617
NAT	41	fr	fr	UH	23	0	0	0	0
NAT	41	fr	fr	UH	24	0.2710430839002268	931.0351743613518	1625.4656455531099	2397.3833117144422
NAT	41	fr	fr	UH	25	0.7266213151927438	546.6635124360597	1566.7869706532556	2596.033902797217
NAT	41	fr	fr	UH	26	0.1571201814058957	415.4352418659807	1622.2933291518839	2749.508285317936
NAT	41	fr	fr	UH	27	0.2659410430839002	363.85886564992484	1305.004552681335	2489.357594201897
NAT	41	fr	fr	UH	28	0.4522222222222222	365.41822907531576	1391.209243445798	2500.209115263066
NAT	41	fr	fr	UH	29	0.21884353741496596	511.965055794904	1435.056584186624	2590.8118666208293
NAT	41	fr	fr	UH	30	0.23111111111111113	672.2110789391311	1572.091861870457	2844.456641312213
NAT	41	fr	fr	UH	31	0.3141950113378684	397.1035253766178	1484.8098905904897	2776.598930933037
NAT	41	fr	fr	UH	32	0.18244897959183673	742.864591875372	1620.8690043104361	2721.352842677607
NAT	41	fr	fr	UH	33	0.21707482993197277	527.1048115456244	1660.2740156353384	2602.9079920223344
NAT	41	fr	fr	UH	34	0.21553287981859412	339.68371055318096	1659.7351939378595	2663.683016592719
NAT	41	fr	fr	UH	35	0.32485260770975055	508.2253625573197	1431.9866813451576	2465.4762280378245
NAT	41	fr	fr	UH	36	0.7177551020408164	770.8808289038059	1565.264915667612	2829.0311533095182
NAT	41	fr	fr	UH	37	0.4621541950113379	519.8581403227455	1423.7518372406523	2689.5183406420765
NAT	41	fr	fr	UH	38	0.21394557823129254	394.47045034907075	1366.4976395830272	2689.709055712126
NAT	41	fr	fr	UH	39	0.4904308390022676	820.056310967762	1640.2179102007626	2574.1937657624267
NAT	41	fr	fr	UH	40	0.17571428571428568	539.487428033287	1382.1017240636068	2520.961212216477
NAT	41	fr	fr	UH	41	0.62639455782312925	860.6974054192581	1575.5669658940628	2725.2467657340835
NAT	41	fr	fr	UH	42	0.7347619047619048	650.4619345633107	1503.0586040762498	2595.2119926868354
NAT	41	fr	fr	UH	43	0.9793424036281179	740.338536570766	1528.0273867721733	2746.3692116873294
NAT	41	fr	fr	UH	44	1.0006349206349205	336.1928832369599	1498.0736157156152	2491.461281120177
NAT	41	fr	fr	UH	45	0.3528344671201814	342.4466374310871	1226.6590337862706	2427.4630994387226
NAT	41	fr	fr	UM	0	0	0	0	0
NAT	41	fr	fr	UM	1	0.14235827664399092	576.2739814842728	1558.4237672138297	3068.4287588374136
NAT	41	fr	fr	UM	2	0.5077097505668935	861.8797960857156	1726.4560914382591	2922.842482544456
NAT	41	fr	fr	UM	3	0.1849886621315193	307.2294527392948	1636.2694501065203	2604.2227565784874
NAT	41	fr	fr	UM	4	0	0	0	0
NAT	41	fr	fr	UM	5	0.33891156462585037	728.6564704761154	1569.4612771196628	2836.721511103196
NAT	41	fr	fr	UM	6	0.4715192743764173	489.6954043997799	1477.4458875214996	2549.697825169471
SIG	24	fr	fr	UH	0	0	0	0	0
SIG	24	fr	fr	UH	0	0	0	0	0
SIG	24	fr	fr	UH	1	0.12904761904761905	541.1717450901148	1592.3631006369692	2452.5703527882733
SIG	24	fr	fr	UH	2	0.2594104308390023	536.1551924369946	1592.5527052322009	2550.5013912380364
SIG	24	fr	fr	UH	3	0.32605442176870747	494.17566335039584	1510.5244779503378	2626.095087022167
SIG	24	fr	fr	UH	4	0.3280952380952381	652.2346758824566	1498.5308011911284	2528.669190462221
SIG	24	fr	fr	UH	5	0.4346258503401361	676.0970459909098	1564.8124428093788	2592.762498699642
SIG	24	fr	fr	UH	6	0.18405895691609978	506.7456878801564	1596.4372944729616	2637.7497341468206
SIG	24	fr	fr	UH	7	0.20036281179138324	513.701226161225	1524.440964102078	2244.535842269783
SIG	24	fr	fr	UH	8	0.21752834467120183	604.9320984890245	1557.8721626743268	2392.7886502486417
SIG	24	fr	fr	UH	9	0.42217687074829935	517.5709399550872	1502.2626970706035	2560.5562936848355
SIG	24	fr	fr	UH	10	0.3178004535147392	496.2390184645572	1538.6059670149257	2622.9070878073076
SIG	24	fr	fr	UH	11	0.4798185941043084	514.7126408534026	1563.346640276599	2454.835501259138
SIG	24	fr	fr	UH	12	0.25310657596371877	680.600817223628	1548.080211404911	2671.2662715061647
SIG	24	fr	fr	UH	13	0.20854875283446714	637.2216363628324	1723.3571739064178	2518.226128620102
SIG	24	fr	fr	UH	14	0.5352607709750568	515.1632501161456	1622.1359132116306	2594.755178984082
SIG	24	fr	fr	UH	15	0.3065079365079365	652.7869502848572	1523.6490758847597	2598.6605369890485
SIG	24	fr	fr	UH	16	0.28197278911564627	675.5288664115897	1485.1832861925368	2485.0971887548412
SIG	24	fr	fr	UH	17	0.15294784580498863	479.32542168016903	1472.1733019696276	2574.83253959859
SIG	24	fr	fr	UH	18	0.36907029478458053	781.7455749128119	1629.9393162353977	2755.0009496615894
SIG	24	fr	fr	UH	19	0.20780045351473922	550.4042217459407	1627.922150383035	2664.414882119502
SIG	24	fr	fr	UH	20	0.14378684807256234	536.6340478010791	1440.6603420770707	2558.0287158997735
SIG	24	fr	fr	UH	21	0.1809750566893424	528.322649106608	1632.316612968719	2713.3930869941096
SIG	24	fr	fr	UH	22	0.15394557823129248	664.4627549396411	1502.354154499979	2602.6689836750597
SIG	24	fr	fr	UH	23	0.18675736961451248	791.7050859223489	1410.7932989178257	2552.6891399574633
SIG	24	fr	fr	UH	24	0.2143537414965986	643.9811499393867	1622.7226247658903	2580.5909251983217
SIG	24	fr	fr	UH	25	0.2338548752834467	703.4119707278621	1346.5364580732132	2767.8400943303636
SIG	24	fr	fr	UH	26	0.22884353741496596	549.9889530994816	1412.2967437872385	2722.983491349401
SIG	24	fr	fr	UH	27	0.3358503401360544	598.7613649691272	1549.38910113312	2525.773621577663
SIG	24	fr	fr	UM	1	0.28870748299319726	569.1600255942517	1519.2554991501534	2521.848023567807
SIG	24	fr	fr	UM	2	0.37571428571428567	560.7758740936463	1542.7742876529921	2641.571849426023
SIG	24	fr	fr	UM	3	0.2991609977324263	518.108995373152	1497.3366878425027	2537.4084462310043
SIG	24	fr	fr	UM	4	0.4302040816326531	531.9509513696015	1534.5399048266554	2685.374481869991
SIG	24	fr	fr	UM	5	0.4199546485260771	741.5497559334143	1651.9159945414392	2489.642682587673
SYL	37	dt	fr	UH	0	0	0	0	0
SYL	37	dt	fr	UH	1	0.2683673469387755	458.4160778625706	1661.2715142985144	2684.356638039955
SYL	37	dt	fr	UH	2	0	0	0	0
SYL	37	dt	fr	UH	3	0.5332879818594104	702.5906698061955	1405.7256159715828	2912.7788274923287
SYL	37	dt	fr	UH	4	0.41308390022675734	620.1832872024985	1433.765317364656	2699.2470369287767
SYL	37	dt	fr	UH	5	0	0	0	0
SYL	37	dt	fr	UH	6	0.44492063492063494	531.9187843291711	1399.482855918564	2661.7067077112188
SYL	37	dt	fr	UH	7	0.24560090702947843	550.5725606486086	1748.7626603871672	2649.9991183693196
SYL	37	dt	fr	UH	8	0.2710430839002268	608.6952512392826	1698.36477442991	2612.7240916539185
SYL	37	dt	fr	UH	9	0.22823129251700677	662.5904996742513	1386.5678195924606	2566.418446348155
SYL	37	dt	fr	UH	10	0.2673469387755102	614.5304408493256	1666.2610967395863	2704.525326264172
SYL	37	dt	fr	UH	11	0.2652834467120181	622.3997371780338	1499.6667191714557	2930.053455418241
SYL	37	dt	fr	UH	12	0.4508163265306123	520.0571468944472	1104.355844075227	2739.6048321565754
SYL	37	dt	fr	UH	13	0	0	0	0
SYL	37	dt	fr	UH	14	0	0	0	0
SYL	37	dt	fr	UH	15	0	0	0	0
SYL	37	dt	fr	UH	16	0	0	0	0
SYL	37	dt	fr	UH	17	0.2119954648526077	564.1021990037159	1559.3251328392018	2908.659025281637
SYL	37	dt	fr	UH	18	0.13904761904761903	730.8965012035949	1437.4374032766366	2739.234338258574
SYL	37	dt	fr	UH	19	0.3412018140589569	496.58685642290413	1945.4863169149687	2775.446917182256
SYL	37	dt	fr	UH	20	0.2295238095238095	598.2231092017425	1129.6522422817516	2775.0409538759336
SYL	37	dt	fr	UM	0	0	0	0	0
SYL	37	dt	fr	UM	0	0	0	0	0
SYL	37	dt	fr	UM	1	0.3431972789115646	748.5471721709024	1490.6354945414753	2750.7580730052136
SYL	37	dt	fr	UM	2	0.7661224489795918	627.1088865838286	1531.0077640313998	2682.3355625484414
SYL	37	dt	fr	UM	3	0.20691609977324263	768.245858324802	1287.238886500264	2703.5887974418447
SYL	37	dt	fr	UM	4	0.3656916099773243	506.55211330012395	1367.3368391173885	2449.82767420029
SYL	37	dt	fr	UM	5	0.32814058956916103	617.4641948501561	1358.9662325312586	2428.6189445881787
SYL	37	dt	fr	UM	6	0.2306349206349206	731.8006965895025	1299.772261227796	2814.5570162700583
SYL	37	dt	fr	UM	7	0.4470068027210885	517.8532788270467	1484.4960549306063	2613.752958593223
SYL	37	dt	fr	UM	8	0.34977324263038545	429.7731944599496	1617.1232744944828	2666.2986057773614
SYL	37	dt	fr	UM	9	0.14752834467120182	689.5282012844826	1473.3067495538103	2674.8413755754677
SYL	37	dt	fr	UM	10	0.14378684807256234	751.2229236927978	1619.708332833574	2678.627690823938
SYL	37	dt	fr	UM	11	0.4190476190476191	823.627600978104	1353.7565515435804	2654.6396748546495
AMM	36	fr	dt	UH	0	0	0	0	0
AMM	36	fr	dt	UH	0	0	0	0	0
AMM	36	fr	dt	UH	0	0	0	0	0
AMM	36	fr	dt	UH	0	0	0	0	0
AMM	36	fr	dt	UH	0	0	0	0	0
AMM	36	fr	dt	UH	1	0.21151927437641724	439.89241652383816	2078.342817275085	2982.3124386585364
AMM	36	fr	dt	UH	2	0.5669387755102041	651.4416050997522	1530.4157768326918	3015.1208625039358
AMM	36	fr	dt	UH	3	0.21616780045351472	662.5933273081996	1768.6796479811446	2793.631928507063
AMM	36	fr	dt	UH	4	0.1619954648526077	415.9040005014892	1778.2555977875816	2829.3313863886033
AMM	36	fr	dt	UH	5	0.17616780045351474	510.412981711017	1748.175841051495	2946.857754613269
AMM	36	fr	dt	UH	6	0.20879818594104307	582.4284778371663	1547.817056975336	2811.824252516201
AMM	36	fr	dt	UH	7	0.8203174603174603	567.757657965718	1825.2710460774056	2789.977636231093
AMM	36	fr	dt	UH	8	0.35335600907029474	561.882025933246	1572.3968815567075	2755.643132582955
AMM	36	fr	dt	UH	9	0.27070294784580495	558.7814900443268	1766.6149692671777	2800.150326038271
AMM	36	fr	dt	UH	10	0.37081632653061225	502.3011615926529	1729.1613253459263	2870.7385312111937
AMM	36	fr	dt	UH	11	0.06412698412698412	432.8165118817004	1761.0850986102946	2891.194408276824
AMM	36	fr	dt	UH	12	0.19548752834467117	695.4674333907329	1903.3867123352911	3125.011204122176
AMM	36	fr	dt	UH	13	0.29088435374149657	519.5561307585743	1717.150322081166	2903.0476099366847
AMM	36	fr	dt	UH	14	0.35637188208616777	492.6980655120901	1582.4690450564315	2842.7341373463037
AMM	36	fr	dt	UH	15	0.2560090702947846	457.9059790201022	1818.5269483702746	2881.1728899923596
AMM	36	fr	dt	UH	16	0.3440362811791383	461.942556700634	1715.236657361075	2874.570606942645
AMM	36	fr	dt	UH	17	0.33959183673469384	406.77802015818213	1539.3685756463462	3072.3499933862063
AMM	36	fr	dt	UH	18	0.28775510204081634	587.6586551895853	1628.1335468777895	2630.6403541875134
AMM	36	fr	dt	UH	19	0.20317460317460315	498.7680950580526	1828.6498534132556	2889.0783082612006
AMM	36	fr	dt	UH	20	0.6135600907029478	497.01893922090335	1655.7487929411236	2787.1313716831487
AMM	36	fr	dt	UH	21	0.20267573696145122	495.03144338084326	1589.9259583040289	2855.3813463165443
AMM	36	fr	dt	UH	22	0.2610430839002268	468.2535602564333	1512.75857129822	2601.235935963236
AMM	36	fr	dt	UH	23	0.5990702947845805	605.025290400275	1671.029124349298	2725.4762761979464
AMM	36	fr	dt	UH	24	0.1797052154195011	527.8397253625801	1775.4310050929234	2830.5884625829217
AMM	36	fr	dt	UH	25	0.282063492063492	521.094889843356	1662.4729505067082	2821.4844598469426
AMM	36	fr	dt	UH	26	0.337437641723356	546.1508611036825	1747.3241533190715	2846.2559595015587
AMM	36	fr	dt	UH	27	0.26494331065759635	511.94555062764573	1759.1127259055897	2837.852896157874
AMM	36	fr	dt	UH	28	0.2568707482993198	494.1281452919539	1659.0724349745703	2779.1467105092956
AMM	36	fr	dt	UH	29	0.10746031746031745	501.1598422757197	1508.3660443269277	2774.1337066749848
AMM	36	fr	dt	UH	30	0.4189795918367347	478.10296366280545	1633.6179242865408	2749.5802318428246
AMM	36	fr	dt	UH	31	0.23244897959183672	498.94159112088465	1827.523800444999	2813.4930650340875
AMM	36	fr	dt	UH	32	0.25585034013605445	499.03705423858537	1698.8410948825544	2781.423714665198
AMM	36	fr	dt	UH	33	0.19925170068027212	438.8423799351007	1643.0876190396198	2557.8934809143543
AMM	36	fr	dt	UH	34	0.11623582766439908	429.637349105424	1629.6713943570978	2711.1441817642985
AMM	36	fr	dt	UH	35	0.37226757369614516	620.3628325078786	1668.1416188378287	2752.0420575568382
AMM	36	fr	dt	UH	36	0.38943310657596375	439.9640548074636	1743.6252009926611	2718.118056453098
AMM	36	fr	dt	UH	37	0.9051927437641724	477.5098724054608	1703.0902548470613	2727.279763629137
AMM	36	fr	dt	UH	38	0.1573922902494331	552.0603003404128	1716.093466371938	2827.0507030374238
AMM	36	fr	dt	UH	39	0.21197278911564624	489.8198923321247	1686.021445639717	2581.890924874079
AMM	36	fr	dt	UH	40	0.16240362811791384	500.30072427100794	1709.1266797145229	2806.3025227450016
AMM	36	fr	dt	UH	41	0.2602040816326531	445.1365434048961	1751.2871299084627	2715.8900830384327
AMM	36	fr	dt	UH	42	0.16938775510204082	488.4048886371239	1692.4267404813672	2733.551284182753
AMM	36	fr	dt	UH	43	0.34712018140589573	503.1397709624666	1839.035865329945	2643.0076562166414
AMM	36	fr	dt	UH	44	0.1803174603174603	450.6041046775996	1703.9090981943255	2848.580769472139
AMM	36	fr	dt	UH	45	0.2036281179138322	430.9234202673248	1705.2553566535828	2710.1553119611813
AMM	36	fr	dt	UH	46	0.41258503401360547	516.8891357487435	1591.2249470262357	2708.4458984844136
AMM	36	fr	dt	UH	47	0.7326757369614513	605.706892735936	1590.4436478601879	2793.1739868708573
AMM	36	fr	dt	UH	48	0.18938775510204078	501.25847766436607	1900.4142570081754	2809.0427010207823
AMM	36	fr	dt	UH	49	0.5006349206349207	488.21135743929597	1711.954487711339	2754.568731972635
AMM	36	fr	dt	UH	50	0.23748299319727892	439.87484211872516	1715.3583610123371	2751.988747485209
AMM	36	fr	dt	UH	51	0.2867573696145125	518.4309777400997	2071.1323299846904	2974.7637220346164
AMM	36	fr	dt	UH	52	0.1753061224489796	511.98384809585696	1845.8941842301492	2809.1898505516288
AMM	36	fr	dt	UH	53	0.445124716553288	682.9944657769538	1581.6458046393823	2764.136310325367
AMM	36	fr	dt	UH	54	0.2356689342403628	438.2318663000232	1767.9674443309966	2931.380742752178
AMM	36	fr	dt	UH	55	0.2803628117913832	519.9814243028278	1678.78234200313	2752.4779858654624
AMM	36	fr	dt	UH	56	0.241156462585034	488.4041380551059	1709.5621192090844	2844.5620385452216
AMM	36	fr	dt	UH	57	0.22936507936507936	561.8993617087094	1757.519097634446	2905.9225993501313
AMM	36	fr	dt	UH	58	0.3447165532879819	417.60359032978977	1795.404403796565	2805.3901330187555
AMM	36	fr	dt	UH	59	0.13061224489795917	394.8564084128192	1909.9897621819337	2862.116214512519
AMM	36	fr	dt	UH	60	0.3418140589569161	560.0251340429736	1738.2476530772042	2937.6025755191044
AMM	36	fr	dt	UH	61	0.2424716553287982	469.2659618548509	1817.0182962835593	2893.87280615926
AMM	36	fr	dt	UH	62	0.3670748299319728	496.4332682245532	1732.45197803133	2638.013901144755
AMM	36	fr	dt	UH	63	0.17138321995464853	464.5185738769704	2044.206070855984	2780.9939948470837
AMM	36	fr	dt	UH	64	0.2565306122448979	454.7926719967835	1621.5640752264035	2716.2977420232946
AMM	36	fr	dt	UH	65	0.06365079365079365	555.7147821309062	1727.332705414875	2975.7440636230217
AMM	36	fr	dt	UH	66	0.2191156462585034	547.5071486321048	1803.2147447047594	2587.4057312604514
AMM	36	fr	dt	UM	0	0	0	0	0
AMM	36	fr	dt	UM	0	0	0	0	0
AMM	36	fr	dt	UM	0	0	0	0	0
AMM	36	fr	dt	UM	0	0	0	0	0
AMM	36	fr	dt	UM	1	0.3451473922902494	674.3413093706145	1676.3694439752305	2891.9853423590052
AMM	36	fr	dt	UM	2	0.10691609977324262	594.1337411470561	1869.620025160562	2909.4188065402736
AMM	36	fr	dt	UM	3	0.23875283446712017	542.2205100486797	1918.5078618378236	2878.888353381687
AMM	36	fr	dt	UM	4	0.17326530612244898	652.8913669269398	1831.330187661088	2857.9721936698656
AMM	36	fr	dt	UM	5	0.2540816326530613	576.754041328399	1768.049068349503	2880.6298412494334
AMM	36	fr	dt	UM	6	0.19038548752834464	612.9227828749387	1811.5577376738004	2707.895304976495
AMM	36	fr	dt	UM	7	0.2091156462585034	641.0678344948869	1753.866047724654	3020.894921037764
AMM	36	fr	dt	UM	8	0.12519274376417233	460.02711204743684	1680.6802444681118	2767.6009832403993
AMM	36	fr	dt	UM	9	0.20140589569160997	516.2236541198513	1732.4186455094723	2766.4505781106664
AMM	36	fr	dt	UM	10	0.24959183673469384	452.5558053595168	1667.491332970094	2675.4591161916806
AMM	36	fr	dt	UM	11	0.18226757369614513	484.7859862177653	1669.0856344663775	2803.793965594132
AMM	36	fr	dt	UM	12	0.12453514739229024	514.2519292392234	1655.5394381698418	2822.874110064832
AMM	36	fr	dt	UM	13	0.20036281179138324	483.19255957148766	1694.0861572613017	2846.939481868015
AMM	36	fr	dt	UM	14	0.1081859410430839	608.1244367699959	1582.4328001323988	2715.9741984167263
AMM	36	fr	dt	UM	15	0.14877551020408164	484.7809039311596	1772.931407362148	2706.667335655318
AMM	36	fr	dt	UM	16	0.1349206349206349	525.7489288168103	1833.5394976451516	3087.969464971819
AMM	36	fr	dt	UM	17	0.1580952380952381	525.598571699409	1683.999483340218	2747.567870289999
AMM	36	fr	dt	UM	18	0.17068027210884354	537.9166898637976	1824.274423838867	2696.046543330729
AMM	36	fr	dt	UM	19	0.12839002267573696	517.0067660461161	1602.6537248602742	2700.9493737552125
AMM	36	fr	dt	UM	20	0.1715873015873016	470.62244497737896	1671.5893707284672	2854.440298083644
AMM	36	fr	dt	UM	21	0.17478458049886622	518.8346507625838	1694.6038627459707	2568.1445655245216
AMM	36	fr	dt	UM	22	0.26603174603174606	490.58145051807185	1766.0762043591433	2649.259455198602
AMM	36	fr	dt	UM	23	0.1985034013605442	559.5654413813302	1861.4277477217006	2749.8557473257215
AMM	36	fr	dt	UM	24	0.19979591836734692	524.9098912820108	1768.6256910341351	2841.851734228485
AMM	36	fr	dt	UM	25	0.15192743764172337	483.7543669844509	1741.0924876333866	2833.5610495634924
AMM	36	fr	dt	UM	26	0.22768707482993197	499.6244230007357	1772.054853644739	2768.975668901823
AMM	36	fr	dt	UM	27	0.19843537414965987	616.0932709663421	1751.8428905655871	2764.563884570081
AMM	36	fr	dt	UM	28	0.09421768707482991	597.1289365973212	1707.7077401598685	2753.0125060898085
AMM	36	fr	dt	UM	29	0.16798185941043084	592.6403145960904	1674.6656281943983	2835.1653821703194
AMM	36	fr	dt	UM	30	0.15206349206349204	470.65677240666884	2122.0058014205542	2824.6913912596947
AMM	36	fr	dt	UM	31	0.2075736961451247	541.2131752746396	1833.320114233627	2759.9411897356513
AMM	36	fr	dt	UM	32	0.22850340136054423	430.1621493499925	1737.308903661352	2702.053193023671
AMM	36	fr	dt	UM	33	0.20578231292517005	528.5350734786127	1737.6934438561698	2777.8087306081097
AMM	36	fr	dt	UM	34	0.15467120181405894	501.2704277416753	1700.3882763734061	2869.115847666739
AMM	36	fr	dt	UM	35	0.2552834467120181	501.69334115841536	1668.6287493827297	2886.6094520461475
AMM	36	fr	dt	UM	36	0.25571428571428567	551.1655889198862	1731.3637006780416	2815.967845108543
AMM	36	fr	dt	UM	37	0.10183673469387755	476.3279271127791	1524.7520905845367	2670.663033055922
AMM	36	fr	dt	UM	38	0.2036281179138322	498.98863682773873	1708.6042967335393	2628.4685062983863
AMM	36	fr	dt	UM	39	0.3522448979591837	743.6135575519536	1501.3253326017514	2646.0437245676035
AMM	36	fr	dt	UM	40	0.25537414965986394	482.4590817859201	1650.187080451925	2884.2197382354757
AMM	36	fr	dt	UM	41	0.20210884353741496	487.29292361154774	1843.6828222941906	2701.2974746530167
AMM	36	fr	dt	UM	42	0.24136054421768707	594.2499335115277	1596.214195792596	2821.345720224332
AMM	36	fr	dt	UM	43	0.25947845804988656	530.5333825806714	1852.8807658153485	2770.302635172038
AMM	36	fr	dt	UM	44	0.137437641723356	593.0917744108243	1714.5008950607826	2866.298546123672
AMM	36	fr	dt	UM	45	0.22344671201814056	514.7517957869176	1749.3023451454374	2690.14717381673
AMM	36	fr	dt	UM	46	0.0649206349206349	474.8345504521766	2288.41903665868	3011.901547149386
AMM	36	fr	dt	UM	47	0.20179138321995463	540.6092198445974	1794.2563641318188	2899.127588634443
AMM	36	fr	dt	UM	48	0.18224489795918367	519.0070528968798	1742.252150850574	2954.35113208084
AMM	36	fr	dt	UM	49	0.12	460.48187409822015	1808.7517966741093	2690.196581240306
AMM	36	fr	dt	UM	50	0.1673922902494331	315.7828925787091	1744.6880862648165	2840.9212242132644
AMM	36	fr	dt	UM	51	0.17267573696145125	501.93865933156457	1659.929759726739	2565.376474045676
AMM	36	fr	dt	UM	52	0.2109297052154195	540.8765127013941	1811.9851993641764	2853.7336337668135
AMM	36	fr	dt	UM	53	0.12569160997732426	456.5919102934722	1701.393816538549	2962.6242782692752
AMM	36	fr	dt	UM	54	0.17607709750566894	459.17131028338844	1740.9791426506933	2673.682634969467
AMM	36	fr	dt	UM	55	0.1570521541950113	475.10911934006873	1704.5319101404625	2747.9093926089226
AMM	36	fr	dt	UM	56	0.18131519274376415	503.60500338830786	1656.4024940180589	2680.2311511272346
AMM	36	fr	dt	UM	57	0.22541950113378686	591.9909409906544	1841.5841280105294	2688.456385183279
AMS	24	fr	dt	UH	0	0	0	0	0
AMS	24	fr	dt	UH	0	0	0	0	0
AMS	24	fr	dt	UH	0	0	0	0	0
AMS	24	fr	dt	UH	0	0	0	0	0
AMS	24	fr	dt	UH	0	0	0	0	0
AMS	24	fr	dt	UH	0	0	0	0	0
AMS	24	fr	dt	UH	0	0	0	0	0
AMS	24	fr	dt	UH	0	0	0	0	0
AMS	24	fr	dt	UH	0	0	0	0	0
AMS	24	fr	dt	UH	0	0	0	0	0
AMS	24	fr	dt	UH	1	0	0	0	0
AMS	24	fr	dt	UH	2	0.18909297052154192	501.5149001735318	1671.9477826088514	2612.973393688223
AMS	24	fr	dt	UH	3	0.17875283446712018	575.255648289717	1759.1937848196558	2736.08045026594
AMS	24	fr	dt	UH	4	0.24913832199546485	794.0765975364592	1664.1523200128984	2758.2519357659007
AMS	24	fr	dt	UH	5	0.3242176870748299	464.1124805570736	1642.296544422915	2847.999566984722
AMS	24	fr	dt	UH	6	0.5102267573696145	702.070330186041	1718.3653489481107	2810.4661875762044
AMS	24	fr	dt	UH	7	0.10331065759637187	536.6559886396199	1596.2556234470608	2546.3709664783996
AMS	24	fr	dt	UH	8	0.22154195011337866	620.4864587093655	1641.5385764839561	2546.837106008996
AMS	24	fr	dt	UH	9	0.32049886621315193	713.9786265245405	1678.20467956562	2689.2409442911558
AMS	24	fr	dt	UH	10	0.4286848072562358	577.0680674165947	1689.3577360261806	2570.2622585874824
AMS	24	fr	dt	UH	11	0.242312925170068	704.7235013306338	1586.2210574195071	2537.4827336495136
AMS	24	fr	dt	UH	12	0.5541496598639456	551.8183973442211	1808.4863851555224	2575.2756448968394
AMS	24	fr	dt	UH	13	0.33727891156462586	511.4967893939652	1631.7824629476138	2480.35871126083
AMS	24	fr	dt	UH	14	1.614285714285714	479.5925524888935	1490.9438056997828	2395.6701759464027
AMS	24	fr	dt	UH	15	0.16814058956916098	498.20816308930966	1655.1684090024974	2575.703451512813
AMS	24	fr	dt	UH	16	0.30866213151927435	754.2084902152399	1701.6814194529043	2675.775103551788
AMS	24	fr	dt	UH	17	0.2680725623582766	540.5713294893501	1755.247752212353	2586.6840735236838
AMS	24	fr	dt	UH	18	0.1871655328798186	516.8848748086307	1759.8268159160862	2590.1286657171986
AMS	24	fr	dt	UH	19	0.43417233560090707	798.8843301499371	1721.7303664231642	2645.895683836298
AMS	24	fr	dt	UH	20	0.21070294784580498	516.3058867488095	1580.3939468765918	2762.357361452555
AMS	24	fr	dt	UH	21	0.19530612244897957	741.3371779704851	1857.9568251060557	2826.627833315801
AMS	24	fr	dt	UH	22	0.25907029478458055	585.7327681756842	1725.316383742864	2694.1289796488095
AMS	24	fr	dt	UH	23	0.3282312925170068	567.9232636838373	1708.1353367704799	2779.662945090585
AMS	24	fr	dt	UH	24	1.451814058956916	700.3316927164461	1487.452180707458	2632.7341972142585
AMS	24	fr	dt	UH	25	0.4407709750566894	731.2323507094859	1697.8243591860403	2765.57162083799
AMS	24	fr	dt	UH	26	0.34680272108843535	727.7710202210469	1586.0527366988542	2716.6781122785787
AMS	24	fr	dt	UH	27	0.4389569160997733	688.3933080079292	1733.5266289310707	2675.474408481717
AMS	24	fr	dt	UH	28	0.5365079365079365	518.0869414028981	1655.3175516573428	2549.698182184462
AMS	24	fr	dt	UH	29	0.42442176870748305	684.9979681610071	1556.224321480808	2522.512140307972
AMS	24	fr	dt	UH	30	0.14131519274376417	403.1717904439712	1670.402871949066	2506.422918297523
AMS	24	fr	dt	UH	31	0.33859410430839	550.3389472608694	1569.3477475743694	2775.7436916490483
AMS	24	fr	dt	UH	32	0.299297052154195	702.324077837156	1467.2323799656137	2745.20543481373
AMS	24	fr	dt	UH	33	1.1875510204081632	619.4919189611154	1587.578005886967	2607.079223294796
AMS	24	fr	dt	UH	34	0.2450113378684807	661.0397815803921	1491.3385778807685	2605.4446049698113
AMS	24	fr	dt	UH	35	0.9997278911564625	536.952253136708	1387.6147023421508	2528.0569629469765
AMS	24	fr	dt	UH	36	0.3948526077097506	815.5130789539949	1771.4333771600427	2592.586882876872
AMS	24	fr	dt	UH	37	0.4236054421768708	596.1146406034077	1641.3408168143237	2632.1318252921537
AMS	24	fr	dt	UH	38	0.31054421768707485	521.649811397997	1513.4670055285255	2816.5157647067904
AMS	24	fr	dt	UH	39	0	0	0	0
AMS	24	fr	dt	UH	40	0.14936507936507937	554.0362065472965	1785.5159456554832	2544.0679378379236
AMS	24	fr	dt	UH	41	0.3060090702947845	601.7523501935452	1711.0528946780637	2739.5757054752467
AMS	24	fr	dt	UH	42	0.2903174603174603	738.3193576609762	1767.2517539865867	2927.2852665612513
AMS	24	fr	dt	UH	43	0.3681632653061224	527.5526634665895	1743.663409773126	2769.4332552032392
AMS	24	fr	dt	UH	44	0.18834467120181406	559.2848287351533	1526.618758529012	2665.83320348697
AMS	24	fr	dt	UH	45	0.1592063492063492	703.0955417857989	1740.0684262499567	2885.6451568332363
AMS	24	fr	dt	UH	46	0.6200226757369615	608.664316063361	1605.3716156067044	2574.0782506688447
AMS	24	fr	dt	UH	47	0.16632653061224487	542.6041187571725	1865.283343592182	2625.6397984702517
AMS	24	fr	dt	UH	48	0.487936507936508	760.6503489682846	1509.9808480212369	2669.9361069113993
AMS	24	fr	dt	UH	49	0.3154875283446712	537.2137052494088	1659.2263760674157	2618.9585292788124
AMS	24	fr	dt	UH	50	0.16977324263038548	462.0630399618781	1578.9428815988504	2634.455466743778
AMS	24	fr	dt	UH	51	0.6315646258503401	850.1902972850229	1516.6907792602965	2731.1808752616985
AMS	24	fr	dt	UH	52	0.7611791383219955	529.7635461390166	1667.7653349525367	2623.7552288840357
AMS	24	fr	dt	UH	53	1.0549206349206348	524.2116341222159	1613.2826524335078	2538.9163753902803
AMS	24	fr	dt	UH	54	0.5156916099773243	686.0910638225627	1688.8491302843834	2624.6120588595877
AMS	24	fr	dt	UH	55	0.49560090702947845	675.224212775292	1739.3780222586283	2512.884369082109
AMS	24	fr	dt	UH	56	0.46086167800453515	500.1690869387708	1810.353316722345	2673.620951275029
AMS	24	fr	dt	UH	57	0.403061224489796	581.9903803411609	1647.4245528606084	2608.627696633888
AMS	24	fr	dt	UH	58	0.2805668934240363	431.64880688043996	1618.6735369893095	2850.0934717734835
AMS	24	fr	dt	UH	59	0.19070294784580497	527.8930404204177	1786.808886227798	2868.3054196404287
AMS	24	fr	dt	UH	60	0.6656916099773242	717.2740020068628	1725.697948184969	2668.3411547311734
AMS	24	fr	dt	UH	61	0.21707482993197277	584.7175483870269	1751.4050113356207	2619.9810577214885
AMS	24	fr	dt	UH	62	0.27852607709750565	667.0922270808003	1543.6264986909748	2542.3787687884455
AMS	24	fr	dt	UH	63	0.4852154195011338	755.6954663690234	1720.6106912517441	2683.8475325282943
AMS	24	fr	dt	UH	64	0.1472108843537415	441.57057519623254	2400.681863343688	3435.9289869489276
AMS	24	fr	dt	UH	65	1.242312925170068	665.8643600668713	1673.6032162496297	2530.4575332135937
AMS	24	fr	dt	UH	66	0.317437641723356	572.3119144219957	1718.2000401955138	2726.4491967033773
AMS	24	fr	dt	UH	67	0.568843537414966	789.2574923890577	1621.0299852713254	2722.5373107608466
AMS	24	fr	dt	UH	68	0.39780045351473925	614.8580720630405	1516.4664635066165	2646.465368497261
AMS	24	fr	dt	UH	69	0.41931972789115646	735.8183264120821	1690.2149947170503	2648.373996054936
AMS	24	fr	dt	UH	70	1.6510430839002266	508.1388402471415	1579.2788673252883	2537.8690603481973
AMS	24	fr	dt	UH	71	0.4269387755102041	719.2483616517507	1494.999072847809	2506.819458700069
AMS	24	fr	dt	UH	72	0.5211111111111111	451.0170298833415	1725.7609506867686	2765.899631858274
AMS	24	fr	dt	UH	73	0.1921315192743764	815.7594367067286	1777.2790371925182	2814.4097972295167
AMS	24	fr	dt	UH	74	0.34281179138321993	749.5150860735198	1656.6062015415666	2680.8735007365167
AMS	24	fr	dt	UH	75	0.9054421768707482	861.4475646184508	1642.8785314353063	2778.4649121400935
AMS	24	fr	dt	UH	76	0.22424036281179135	626.8668231628898	1812.9749935712885	2706.033655885012
AMS	24	fr	dt	UH	77	0.3395011337868481	575.3525423913272	1744.122492674868	2610.084781391032
AMS	24	fr	dt	UH	78	0.33836734693877546	753.4564549215107	1749.702844926045	2770.729855997758
AMS	24	fr	dt	UH	79	0.5549659863945579	489.4277374181161	1662.6201726785869	2348.0776417049165
AMS	24	fr	dt	UH	80	0.14058956916099774	802.1160511963375	1832.5330611952968	2711.364980761629
AMS	24	fr	dt	UM	0	0	0	0	0
AMS	24	fr	dt	UM	0	0	0	0	0
AMS	24	fr	dt	UM	0	0	0	0	0
AMS	24	fr	dt	UM	0	0	0	0	0
AMS	24	fr	dt	UM	0	0	0	0	0
AMS	24	fr	dt	UM	0	0	0	0	0
AMS	24	fr	dt	UM	1	0.33619047619047615	710.4997725981164	1579.8690639382155	2754.625589113082
AMS	24	fr	dt	UM	2	0.2752154195011338	704.500093021061	1677.681191271209	2620.477167701098
AMS	24	fr	dt	UM	3	0.24242630385487526	782.5943588163121	1566.4450600146552	2626.4428607622704
AMS	24	fr	dt	UM	4	0.2127891156462585	590.5970936087922	1713.5412992734641	2606.500335472505
AMS	24	fr	dt	UM	5	0.23439909297052156	846.2979269334576	1739.6678390730376	2915.527183461196
AMS	24	fr	dt	UM	6	0.2510204081632653	716.6221648772074	1609.3141842405394	2641.8130465558747
AMS	24	fr	dt	UM	7	0.0955328798185941	588.0520788008303	1567.571208205531	2653.446548679994
AMS	24	fr	dt	UM	8	0	0	0	0
AMS	24	fr	dt	UM	9	0.20394557823129253	672.5734176924364	1662.7246642114592	2922.1545411118714
AMS	24	fr	dt	UM	10	0.20312925170068027	826.557362027811	1541.0977925967488	2670.075967283984
AMS	24	fr	dt	UM	11	0.25331065759637184	840.7388885453754	1679.3436007912944	2730.440043618814
AMS	24	fr	dt	UM	12	0.20777777777777776	782.1011176055699	1702.8098731232637	2593.4518654078497
AMS	24	fr	dt	UM	13	0.2314285714285714	782.0685125107768	1566.1943129449533	2491.324664450774
AMS	24	fr	dt	UM	14	0.19487528344671204	792.5134284995878	1596.0538980774024	2819.8483050399996
AMS	24	fr	dt	UM	15	0.22634920634920633	769.1699517293728	1620.4159093246788	2761.9063620596216
AMS	24	fr	dt	UM	16	0.1349659863945578	757.4243277706152	1752.2396101246939	2781.309306685526
AMS	24	fr	dt	UM	17	0.4072789115646259	540.3210606113391	1893.2892507921051	2779.9832201220993
AMS	24	fr	dt	UM	18	0.27433106575963717	622.3990696995908	1648.3034588302496	2580.407073522436
AMS	24	fr	dt	UM	19	0.21968253968253967	853.1111627452025	1681.6771066839422	2956.2409590142834
AMS	24	fr	dt	UM	20	0.1361451247165533	789.9046778404896	1633.605321854648	2792.1598959204744
AMS	24	fr	dt	UM	21	0.29648526077097503	596.7076122641325	1540.9023933491699	2641.0915218059417
AMS	24	fr	dt	UM	22	0.4573696145124717	699.8064970434683	1453.742231242813	2560.5912929722044
AMS	24	fr	dt	UM	23	0.1420408163265306	500.66082453653564	1643.2291542487592	2855.3243663689072
AMS	24	fr	dt	UM	24	0.15485260770975054	876.3837956770326	1552.2909894632653	2913.269212906831
AMS	24	fr	dt	UM	25	0.635328798185941	712.9040646108044	1828.4287112689972	2648.221472542918
AMS	24	fr	dt	UM	26	0	0	0	0
AMS	24	fr	dt	UM	27	0.24782312925170066	720.936703313193	1781.2131788729994	2745.151225699025
AMS	24	fr	dt	UM	28	0.2130612244897959	825.7735580503033	1693.59220503434	2977.116745948928
AMS	24	fr	dt	UM	29	0.2561224489795918	759.6982688102822	1635.4016577178763	3098.815833933282
AMS	24	fr	dt	UM	30	0.13122448979591836	819.4417693048322	1833.1912372394522	2884.599066356112
ARI	33	fr	dt	UH	0	0	0	0	0
ARI	33	fr	dt	UH	0	0	0	0	0
ARI	33	fr	dt	UH	0	0	0	0	0
ARI	33	fr	dt	UH	0	0	0	0	0
ARI	33	fr	dt	UH	0	0	0	0	0
ARI	33	fr	dt	UH	0	0	0	0	0
ARI	33	fr	dt	UH	0	0	0	0	0
ARI	33	fr	dt	UH	0	0	0	0	0
ARI	33	fr	dt	UH	1	0	0	0	0
ARI	33	fr	dt	UH	2	0	0	0	0
ARI	33	fr	dt	UH	3	0.18306122448979592	433.342973986273	1613.8652532692272	3124.7638529654982
ARI	33	fr	dt	UH	4	0.2677551020408163	373.3295131098748	1546.8460098129099	3000.163110160543
ARI	33	fr	dt	UH	5	0.1765532879818594	421.5898195914338	1483.4059723406338	2846.9415865268543
ARI	33	fr	dt	UH	6	0	0	0	0
ARI	33	fr	dt	UH	7	0.17598639455782314	453.34013635552725	1602.7384541478161	2733.3607864212213
ARI	33	fr	dt	UH	8	0	0	0	0
ARI	33	fr	dt	UH	9	0.18573696145124716	322.54607497273827	1565.337450539581	2717.7728021955118
ARI	33	fr	dt	UH	10	0.3092290249433106	497.5358137902827	1450.4102535699355	2606.2996597346
ARI	33	fr	dt	UH	11	0.08709750566893423	474.7100493513035	1757.8306492420138	2843.9699310748083
ARI	33	fr	dt	UH	12	0.23170068027210886	367.56478170936896	1698.0659729319495	2722.8993343354036
ARI	33	fr	dt	UH	13	0.7544671201814059	437.86191249208844	1362.538851058555	2657.6525606369028
ARI	33	fr	dt	UH	14	0.35517006802721085	532.131013103036	1661.5617243602903	2713.9829052217083
ARI	33	fr	dt	UH	15	0	0	0	0
ARI	33	fr	dt	UH	16	0	0	0	0
ARI	33	fr	dt	UH	17	0.7559863945578231	502.2682947407538	1183.8819261349697	2700.8265823108077
ARI	33	fr	dt	UH	18	0	0	0	0
ARI	33	fr	dt	UH	19	0.6055102040816327	387.58820068052546	1150.078276628015	2697.2866996938073
ARI	33	fr	dt	UH	20	0	0	0	0
ARI	33	fr	dt	UH	21	0.2705442176870748	405.63924274095365	1353.4214635783924	2701.012519409082
ARI	33	fr	dt	UH	22	0	0	0	0
ARI	33	fr	dt	UH	23	0.37190476190476185	531.0381545456411	1293.459557149853	2756.5883914082665
ARI	33	fr	dt	UH	24	0.2055328798185941	494.3433757729202	1217.2346881401886	2766.2685873240666
ARI	33	fr	dt	UH	25	0.16247165532879818	548.6754051363125	1708.2801347833617	2785.714727867037
ARI	33	fr	dt	UH	26	0.5144444444444445	629.8852084672139	1552.393069069327	2620.633505263773
ARI	33	fr	dt	UH	27	0.21281179138321996	610.4821659928422	1764.0663780657364	2709.4171098106076
ARI	33	fr	dt	UH	28	0.34990929705215423	420.48986458297327	1573.5214012466713	2690.6725781556447
ARI	33	fr	dt	UH	29	0	0	0	0
ARI	33	fr	dt	UH	30	0.32659863945578227	346.6213475977022	1623.1440887393978	2881.7268495771405
ARI	33	fr	dt	UH	31	0.19244897959183674	428.5804434609684	1857.445372146167	2778.5287246495454
ARI	33	fr	dt	UH	32	0.1404081632653061	468.9040988680882	1537.4601972251776	2804.30074101424
ARI	33	fr	dt	UH	33	0.13417233560090702	387.27530098032156	1524.039699486493	2750.4510385760423
ARI	33	fr	dt	UH	34	0.8415419501133787	374.7684597517179	1185.138225623615	2582.9612073403723
ARI	33	fr	dt	UH	35	0.17793650793650792	582.2964680845496	1612.21317917421	2678.6065937685635
[truncated: 807 more rows]
